# Supplementary material for: Accuracy of Intraoperative Neuromonitoring in the Diagnosis of Intraoperative Neurological Decline in the Setting of Spinal Surgery—A Systematic Review and Meta-Analysis
Source: PubMed Central journal article supplement (PMC10964897; doi:10.1177/21925682231196514), 2024-03-25

**Supplemental Table: List of Excluded Studies**

| <b>Covidence #</b> | <b>Study</b>       | <b>Title</b>                                                                                                                        | <b>Authors</b>                                                                                                          | <b>Journal</b>                              | <b>Reason for Exclusion</b> |
|--------------------|--------------------|-------------------------------------------------------------------------------------------------------------------------------------|-------------------------------------------------------------------------------------------------------------------------|---------------------------------------------|-----------------------------|
| #10                | Zarchi 2022        | A practical method for real-time detection of pedicle wall breaching during funneling                                               | Zarchi O.; Ohana N.; Mercado E.; Amitai A.; Berestizshevsky Y.; Sheinis D.; Benharroch D.; Bar-On E.                    | Archives of Orthopaedic and Trauma Surgery  | Wrong Outcome               |
| #15                | Puvanesarajah 2022 | The deformity angular ratio: can three-dimensional computed tomography improve prediction of intraoperative neuromonitoring events? | Puvanesarajah V.; Marciano G.F.; Hassan F.M.; Lee N.J.; Thuet E.D.; Lombardi J.M.; Sardar Z.M.; Lehman R.A.; Lenke L.G. | Spine Deformity                             | Wrong Outcome               |
| #46                | Jamaludin 2022     | Machine Learning Application of Transcranial Motor-Evoked Potential to Predict Positive Functional Outcomes of Patients             | Jamaludin M.R.; Lai K.W.; Chuah J.H.; Zaki M.A.; Hasikin K.; Abd Razak N.A.; Dhanalakshmi S.; Saw L.B.; Wu X.           | Computational intelligence and neuroscience | Wrong Outcome               |
| #57                | Montes 2022        | Pulse-train versus single-pulse t-EMG stimulation for intraoperative neurophysiologic monitoring                                    | Montes E.; de Blas G.; Barrios C.; Mariscal G.; Burgos J.; Regidor I.; Hevia E.                                         | Clinical Neurology and Neurosurgery         | Wrong Outcome               |

|     |                      |                                                                                                                                                          |                                                                                                                                                                |                                                        |                          |
|-----|----------------------|----------------------------------------------------------------------------------------------------------------------------------------------------------|----------------------------------------------------------------------------------------------------------------------------------------------------------------|--------------------------------------------------------|--------------------------|
|     |                      | of thoracic pedicle screws in adolescent idiopathic scoliosis                                                                                            |                                                                                                                                                                |                                                        |                          |
| #72 | BeaulieuLalanne 2022 | Triggered electromyography (tEMG) in the lumbar spine Its reliable? Correlation of tEMG with postoperative CT images in lumbar instrumentation           | Beaulieu Lalanne L.; Larrondo Carmona R.; Alvarez Lemos F.; Oelker Behn C.; Caceres Copetta M.; Munoz Wilson J.T.; Beaulieu Montoya A.M.; Larrondo Martinez V. | Revista espanola de cirugia ortopedica y traumatologia | Full Text Not in English |
| #78 | Shao 2021            | Efficacy and safety for combination of t-EMG with O-arm assisted pedicle screw placement in neurofibromatosis type I scoliosis surgery                   | Shao X.; Huang Z.; Deng Y.; Yang J.; Sui W.                                                                                                                    | Journal of orthopaedic surgery and research            | Wrong Outcome            |
| #83 | Chang 2021           | Diagnostic accuracy of ssep changes during lumbar spine surgery for predicting postoperative neurological deficit: A systematic review and meta-analysis | Chang R.; Reddy R.P.; Coutinho D.V.; Chang Y.-F.; Anetakis K.M.; Crammond D.J.; Balzer J.R.; Thirumala P.D.                                                    | Spine                                                  | Wrong Study Design       |

|      |                  |                                                                                                                                                |                                                                          |                                              |                          |
|------|------------------|------------------------------------------------------------------------------------------------------------------------------------------------|--------------------------------------------------------------------------|----------------------------------------------|--------------------------|
| #99  | Hiyama 2022      | Utility of Power Tool and Intraoperative Neuromonitoring for Percutaneous Pedicle Screw Placement in Single Position Surgery: A Technical Note | Hiyama A.; Nomura S.; Sakai D.; Watanabe M.                              | World Neurosurgery                           | Wrong Intervention       |
| #116 | Zheng 2021       | Preoperative electrophysiologic assessment of C5-innervated muscles in predicting C5 palsy after posterior cervical decompression              | Zheng C.; Nie C.; Zhu Y.; Xu M.; Lyu F.; Jiang J.; Xia X.                | European Spine Journal                       | Wrong Patient Population |
| #177 | Wu 2020          | Application of different thresholds for instrumentation device testing in minimally invasive lumbosacral spine fixation                        | Wu Y.; Cohen D.; Tellez M.J.; DiGiacinto G.V.; Barquero A.V.; Ulkatan S. | Journal of Clinical Neuroscience             | Wrong Outcome            |
| #183 | Jasiukaitis 2020 | Trending algorithm discriminates hemodynamic from injury related TcMEP amplitude loss                                                          | Jasiukaitis P.; Lyon R.                                                  | Journal of Clinical Monitoring and Computing | Wrong Outcome            |

|      |                     |                                                                                                                                                                                              |                                                                                              |                               |                    |
|------|---------------------|----------------------------------------------------------------------------------------------------------------------------------------------------------------------------------------------|----------------------------------------------------------------------------------------------|-------------------------------|--------------------|
| #203 | Ravindra 2019       | Electromyography stimulation compared with intraoperative O-arm imaging for evaluating pedicle screw breaches in lumbar spine surgery: a prospective analysis of 1006 screws in 164 patients | Ravindra V.M.; Kalra R.R.; Dailey A.T.                                                       | Spine Journal                 | Wrong Outcome      |
| #250 | Zakaria 2018        | Mechanomyography for Intraoperative Assessment of Cortical Breach During Instrumented Spine Surgery                                                                                          | Zakaria H.M.; Tundo K.M.; Sandles C.; Chuang M.; Schultz L.; Aho T.; Abdulkhak M.            | World Neurosurgery            | Wrong Intervention |
| #266 | Zheng 2017          | Screw Placement at the Apex Alters Surgical Outcomes of Moderate Lenke 1 Adolescent Idiopathic Scoliosis                                                                                     | Zheng X.; Qian B.-P.; Liu Z.; Sun X.; Zhu Z.-Z.; Wang B.; Yu Y.; Qiu Y.                      | Clinical Spine Surgery        | Wrong Outcome      |
| #267 | Kaliya-Perumal 2017 | Intraoperative electromyographic monitoring to optimize safe lumbar pedicle screw placement - a retrospective analysis                                                                       | Kaliya-Perumal A.-K.; Charng J.-R.; Niu C.-C.; Tsai T.-T.; Lai P.-L.; Chen L.-H.; Chen W.-J. | BMC Musculoskeletal Disorders | Wrong Intervention |

|      |                |                                                                                                                                                                                         |                                                                                                           |                        |                    |
|------|----------------|-----------------------------------------------------------------------------------------------------------------------------------------------------------------------------------------|-----------------------------------------------------------------------------------------------------------|------------------------|--------------------|
| #270 | Ajiboye 2017   | Utility of Intraoperative Neuromonitoring for Lumbar Pedicle Screw Placement Is Questionable                                                                                            | Ajiboye R.M.; Zoller S.D.; D'Oro A.; Burke Z.D.; Sheppard W.; Wang C.; Buser Z.; Wang J.C.; Pourtaheri S. | Spine                  | Wrong Outcome      |
| #299 | Kassis 2016    | Combining pedicle screw stimulation with spinal navigation, a protocol to maximize the safety of neural elements and minimize radiation exposure in thoracolumbar spine instrumentation | Kassis S.Z.; Abukwedat L.K.; Msaddi A.K.; Majer C.N.; Othman W.                                           | European Spine Journal | Wrong Outcome      |
| #320 | Thirumala 2016 | Diagnostic accuracy of combined multimodality somatosensory evoked potential and transcranial motor evoked potential intraoperative monitoring in patients with idiopathic scoliosis    | Thirumala P.D.; Huang J.; Thiagarajan K.; Cheng H.; Balzer J.; Crammond D.J.                              | Spine                  | Wrong Study Design |

|      |               |                                                                                                                                                                                                                                              |                                                                                                                |                                        |               |
|------|---------------|----------------------------------------------------------------------------------------------------------------------------------------------------------------------------------------------------------------------------------------------|----------------------------------------------------------------------------------------------------------------|----------------------------------------|---------------|
| #365 | Wood 2014     | The surgical learning curve and accuracy of minimally invasive lumbar pedicle screw placement using CT based computer-assisted navigation plus continuous electromyography monitoring - A retrospective review of 627 screws in 150 patients | Wood M.J.; McMillen J.                                                                                         | International Journal of Spine Surgery | Wrong Outcome |
| #377 | Azabou 2014   | Predicting intraoperative feasibility of combined TES-mMEP and cSSEP monitoring during scoliosis surgery based on preoperative neurophysiological assessment                                                                                 | Azabou E.; Manel V.; Abelin-Genevois K.; Andre-Obadia N.; Cunin V.; Garin C.; Kohler R.; Berard J.; Ulkatan S. | Spine Journal                          | Wrong Outcome |
| #393 | Calancie 2014 | Implantation of thoracic pedicle screws: A blinded and randomized clinical study. Part 1. Methods and alarm criteria<br>Clinical article                                                                                                     | Calancie B.; Donohue M.L.; Harris C.B.; Canute G.W.; Singla A.; Wilcoxon K.G.; Moquin R.R.                     | Journal of Neurosurgery: Spine         | Wrong Outcome |

|      |                   |                                                                                                                                                                                                         |                                                                                                                 |                                     |                    |
|------|-------------------|---------------------------------------------------------------------------------------------------------------------------------------------------------------------------------------------------------|-----------------------------------------------------------------------------------------------------------------|-------------------------------------|--------------------|
| #394 | Calancie 2014     | Neuromonitoring with pulse-train stimulation for implantation of thoracic pedicle screws: a blinded and randomized clinical study. Part 1. Methods and alarm criteria                                   | Calancie B.; Donohue M.L.; Harris C.B.; Canute G.W.; Singla A.; Wilcoxon K.G.; Moquin R.R.                      | Journal of neurosurgery. Spine      | Wrong Outcome      |
| #397 | Kulik 2013        | A CT-based study investigating the relationship between pedicle screw placement and stimulation threshold of compound muscle action potentials measured by intraoperative neurophysiological monitoring | Kulik G.; Pralong E.; McManus J.; Debatisse D.; Schizas C.                                                      | European Spine Journal              | Wrong Outcome      |
| #412 | Ney 2013          | Cost-benefit analysis: Intraoperative neurophysiological monitoring in spinal surgeries                                                                                                                 | Ney J.P.; Van Der Goes D.N.; Watanabe J.H.                                                                      | Journal of Clinical Neurophysiology | Wrong Study Design |
| #422 | Fotakopoulos 2013 | The value of transcranial motor-evoked potentials and free-running electromyography in surgery for cervical disc herniation                                                                             | Fotakopoulos G.; Alexiou G.A.; Pachatouridis D.; Karagiorgiadis D.; Konitsiotis S.; Kyritsis A.P.; Voulgaris S. | Journal of Clinical Neuroscience    | Wrong Outcome      |

|      |              |                                                                                                                                                                                             |                                                                                                                      |                                   |                         |
|------|--------------|---------------------------------------------------------------------------------------------------------------------------------------------------------------------------------------------|----------------------------------------------------------------------------------------------------------------------|-----------------------------------|-------------------------|
| #429 | Gazzeri 2013 | Safety of intraoperative electrophysiological monitoring (TES and EMG) for spinal and cranial lesions                                                                                       | Gazzeri R.; Faiola A.; Neroni M.; Fiore C.; Callovini G.; Pischedda M.; Galarza M.                                   | Surgical technology international | Full Text not available |
| #431 | Hwang 2012   | Intraoperative Neurophysiological Monitoring in Spine Deformity Surgery                                                                                                                     | Hwang S.W.; Malhotra N.R.; Shaffrey C.I.; Samdani A.F.                                                               | Spine Deformity                   | Wrong Study Design      |
| #441 | Feng 2012    | Minimally invasive transforaminal lumbar interbody fusion aided with computer-assisted spinal navigation system combined with electromyography monitoring                                   | Feng L.; Wei L.; Fan Z.; Tie L.; Du X.-L.; Chen A.-M.                                                                | Chinese Medical Journal           | Wrong Outcome           |
| #458 | Parker 2011  | Ability of electromyographic monitoring to determine the presence of malpositioned pedicle screws in the lumbosacral spine: Analysis of 2450 consecutively placed screws - Clinical article | Parker S.L.; Amin A.G.; Farber S.H.; McGirt M.J.; Sciubba D.M.; Wolinsky J.-P.; Bydon A.; Gokaslan Z.L.; Witham T.F. | Journal of Neurosurgery: Spine    | Wrong Outcome           |



|      |                 |                                                                                                                                                                        |                                                                                                |                                                  |                       |
|------|-----------------|------------------------------------------------------------------------------------------------------------------------------------------------------------------------|------------------------------------------------------------------------------------------------|--------------------------------------------------|-----------------------|
| #464 | Haghighi 2011   | Correlation between transcranial motor and somatosensory-evoked potential findings in cervical myelopathy or radiculopathy during cervical spine surgery               | Haghighi S.S.; Mundis G.; Zhang R.; Ramirez B.                                                 | Neurological Research                            | Wrong Outcome         |
| #469 | Gavaret 2011    | Intraoperative monitoring in pediatric orthopedic spinal surgery: Three hundred consecutive monitoring cases of which 10% of patients were younger than 4 years of age | Gavaret M.; Trebuchon A.; Aubert S.; Jacopin S.; Blondel B.; Glard Y.; Jouve J.-L.; Bollini G. | Spine                                            | Paediatric population |
| #473 | Mavrogenis 2009 | Accuracy of pedicle screw placement using intraoperative neurophysiological monitoring and computed tomography                                                         | Mavrogenis A.F.; Papagelopoulos P.J.; Korres D.S.; Papadopoulos K.; Sakas D.E.; Pneumaticos S. | Journal of Long-Term Effects of Medical Implants | Wrong Outcome         |
| #474 | Alemo 2010      | Role of intraoperative neurophysiologic monitoring in lumbosacral spine fusion and instrumentation: A retrospective study                                              | Alemo S.; Sayadipour A.                                                                        | World Neurosurgery                               | Wrong Outcome         |

|      |               |                                                                                                        |                                                                       |                                                                                                                                                                                    |                    |
|------|---------------|--------------------------------------------------------------------------------------------------------|-----------------------------------------------------------------------|------------------------------------------------------------------------------------------------------------------------------------------------------------------------------------|--------------------|
| #481 | Samdani 2010  | Learning curve for placement of thoracic pedicle screws in the deformed spine                          | Samdani A.F.; Ranade A.; Saldanha V.; Yondorf M.Z.                    | Neurosurgery                                                                                                                                                                       | Wrong Outcome      |
| #490 | Yamamoto 2010 | Efficacy and limitations of intraoperative spinal cord monitoring using nasopharyngeal tube electrodes | Yamamoto N.; Kobashi H.; Shiba M.; Itoh T.                            | Journal of Neurosurgery: Spine                                                                                                                                                     | Wrong Intervention |
| #505 | Hu 2007       | Time-frequency feature of intraoperative somatosensory evoked potential signals                        | Hu Y.; Jiang F.; Luk K.D.                                             | Conference proceedings : ... Annual International Conference of the IEEE Engineering in Medicine and Biology Society. IEEE Engineering in Medicine and Biology Society. Conference | Wrong Study Design |
| #522 | Kim 2008      | Free-hand pedicle screw placement during revision spinal surgery: Analysis of 552 screws               | Kim Y.-W.; Lenke L.G.; Kim Y.J.; Bridwell K.H.; Kim Y.B.; Watanabe K. | Spine                                                                                                                                                                              | Wrong Outcome      |

|      |                         |                                                                                                                                                                         |                                                                                                                                                     |                                          |                    |
|------|-------------------------|-------------------------------------------------------------------------------------------------------------------------------------------------------------------------|-----------------------------------------------------------------------------------------------------------------------------------------------------|------------------------------------------|--------------------|
| #527 | Rodriguez-Olaverri 2008 | Using triggered electromyographic threshold in the intercostal muscles to evaluate the accuracy of upper thoracic pedicle screw placement (T3-T6)                       | Rodriguez-Olaverri J.C.; Zimick N.C.; Merola A.; De Blas G.; Burgos J.; Piza-Vallespir G.; Hevia E.; Vicente J.; Sanper I.; Domenech P.; Regidor I. | Spine                                    | Wrong Outcome      |
| #547 | Djurasovic 2005         | A prospective analysis of intraoperative electromyographic monitoring of posterior cervical screw fixation                                                              | Djurasovic M.; Dimar 2nd. J.R.; Glassman S.D.; Edmonds H.L.; Carreon L.Y.                                                                           | Journal of spinal disorders & techniques | Wrong Outcome      |
| #552 | Huitema 2006            | Screw position after double-rod anterior spinal fusion in idiopathic scoliosis: An evaluation using computerized tomography                                             | Huitema G.C.; Van Rhijn L.W.; Van Ooij A.                                                                                                           | Spine                                    | Wrong Intervention |
| #600 | MacDonald 2003          | Monitoring scoliosis surgery with combined multiple pulse transcranial electric motor and cortical somatosensory-evoked potentials from the lower and upper extremities | MacDonald D.B.; Al Zayed Z.; Khoudeir I.; Stigsby B.                                                                                                | Spine                                    | Wrong Outcome      |

|      |             |                                                                                                                                                       |                                                                                                       |                                                 |                             |
|------|-------------|-------------------------------------------------------------------------------------------------------------------------------------------------------|-------------------------------------------------------------------------------------------------------|-------------------------------------------------|-----------------------------|
| #611 | Kobara 2000 | Relative effectiveness of electrically- vs mechanically- elicited EMGs in detecting pedicle wall perforation and surgically-induced nerve root damage | Kobara N.; Owen J.H.; Kostuik J.; Huckell C.; Tooke S.M.                                              | Fukuoka igaku zasshi =<br>Hukuoka acta medica   | Wrong Outcome               |
| #613 | Akay 2002   | Continuous neural monitoring in lumbar spine surgery: Experience with 101 patients                                                                    | Akay K.M.; Onder S.                                                                                   | Minimally Invasive<br>Neurosurgery              | Wrong Outcome               |
| #621 | Zileli 2002 | Diagnostic value of electrical stimulation of lumbosacral roots in lumbar spinal stenosis                                                             | Zileli B.; Ertekin C.; Zileli M.;<br>Yunten N.                                                        | Acta Neurologica<br>Scandinavica                | Wrong Patient<br>Population |
| #625 | Pereon 2002 | Combined spinal cord monitoring using neurogenic mixed evoked potentials and collision techniques                                                     | Pereon Y.; Nguyen The Tich S.;<br>Delecrin J.; Pham Dang C.;<br>Bodin J.; Drouet J.-C.; Passuti<br>N. | Spine                                           | Wrong Outcome               |
| #627 | Reidy 2001  | Evaluation of electromyographic monitoring during insertion of thoracic pedicle screws                                                                | Reidy D.P.; Houlden D.; Nolan<br>P.C.; Kim M.; Finkelstein J.A.                                       | Journal of Bone and Joint<br>Surgery - Series B | Wrong Outcome               |

|      |               |                                                                                                                                                                           |                                                                                                            |                                                  |                    |
|------|---------------|---------------------------------------------------------------------------------------------------------------------------------------------------------------------------|------------------------------------------------------------------------------------------------------------|--------------------------------------------------|--------------------|
| #631 | Hu 2001       | Comparison of time-frequency distribution techniques for analysis of spinal somatosensory evoked potential                                                                | Hu Y.; Luk K.D.K.; Lu W.W.; Holmes A.; Leong J.C.Y.                                                        | Medical and Biological Engineering and Computing | Wrong Outcome      |
| #637 | Bosnjak 2000  | Electrical thresholds for biomechanical response in the ankle to direct stimulation of spinal roots L4, L5, and S1: Implications for intraoperative pedicle screw testing | Bosnjak R.; Dolenc V.V.                                                                                    | Spine                                            | Wrong Intervention |
| #639 | Schwartz 2000 | Prevention of positional brachial plexopathy during surgical correction of scoliosis                                                                                      | Schwartz D.M.; Drummond D.S.; Hahn M.; Ecker M.L.; Dormans J.P.                                            | Journal of Spinal Disorders                      | Wrong Outcome      |
| #648 | Luk 1999      | Variability of somatosensory-evoked potentials in different stages of scoliosis surgery                                                                                   | Luk K.D.K.; Hu Y.; Wong Y.W.; Leong J.C.Y.                                                                 | Spine                                            | Wrong Outcome      |
| #662 | Lang 1996     | Myogenic motor-evoked potential monitoring using partial neuromuscular blockade in surgery of the spine                                                                   | Lang E.W.; Beutler A.S.; Chesnut R.M.; Patel P.M.; Kennelly N.A.; Kalkman C.J.; Drummond J.C.; Garfin S.R. | Spine                                            | Wrong Outcome      |

|      |               |                                                                                                                       |                                                                                                                                                                                        |                                               |               |
|------|---------------|-----------------------------------------------------------------------------------------------------------------------|----------------------------------------------------------------------------------------------------------------------------------------------------------------------------------------|-----------------------------------------------|---------------|
| #666 | Nagle 1996    | Intraoperative monitoring of motor evoked potentials: A review of 116 cases                                           | Nagle K.J.; Emerson R.G.; Adams D.C.; Heyer E.J.; Roye D.P.; Schwab F.J.; Weidenbaum M.; McCormick P.; Pile-Spellman J.; Stein B.M.; Farcy J.P.; Gallo E.J.; Dowling K.C.; Turner C.A. | Neurology                                     | Wrong Outcome |
| #670 | Epstein 1996  | Somatosensory evoked potential monitoring (SSEPs) in 173 cervical operations                                          | Epstein N.E.                                                                                                                                                                           | Neuro-Orthopedics                             | Wrong Outcome |
| #672 | Clements 1996 | Evoked and spontaneous electromyography to evaluate lumbosacral pedicle screw placement                               | Clements D.H.; Morledge D.E.; Martin W.H.; Betz R.R.                                                                                                                                   | Spine                                         | Wrong Outcome |
| #690 | Friedman 1987 | Somatosensory evoked potentials after sequential extremity stimulation: A new method for improved monitoring accuracy | Friedman W.A.; Curran M.T.                                                                                                                                                             | Neurosurgery                                  | Wrong Outcome |
| #692 | Mostegl 1984  | The application of somatosensory-evoked potentials in orthopedic spine surgery                                        | Mostegl A.; Bauer R.                                                                                                                                                                   | Archives of Orthopaedic and Traumatic Surgery | Wrong Outcome |

|      |              |                                                                                                                                                  |                                                                                                                                                                               |  |                    |
|------|--------------|--------------------------------------------------------------------------------------------------------------------------------------------------|-------------------------------------------------------------------------------------------------------------------------------------------------------------------------------|--|--------------------|
| #724 | DiMaria 2022 | Patient Factors Impacting Baseline Motor Evoked Potentials (MEPs) in Patients Undergoing Cervical Spine Surgery for Myelopathy or Radiculopathy. | DiMaria, Stephen; Wilent, W.; Nicholson, Kristen; Tesdahl, Eric; Valiuskyte, Kornelija; Mao, Jennifer; Seger, Philip; Singh, Akash; Sestokas, Anthony; Vaccaro, Alex; MD, PhD |  | Wrong Outcome      |
| #726 | Li 2022      | Safe Electromyography Stimulation Thresholds Within Kambin's Triangle During Endoscopic Transforaminal Lumbar Interbody Fusion.                  | Li, Yingda; Wang, Michael                                                                                                                                                     |  | Wrong Outcome      |
| #781 | Kiridly 2021 | Positioning-Related Peripheral Nerve Injury During Spine Surgery and the Role of Intraoperative Neuromonitoring.                                 | Kiridly, Daniel; MD, MBA; Satin, Alexander; Derman, Peter; MD, MBA                                                                                                            |  | Wrong Study Design |

|      |                |                                                                                                                                                                                                                                                           |                                                                                                                                                                                                                                                                                                                                                                                                                                                                                                                                                              |  |               |
|------|----------------|-----------------------------------------------------------------------------------------------------------------------------------------------------------------------------------------------------------------------------------------------------------|--------------------------------------------------------------------------------------------------------------------------------------------------------------------------------------------------------------------------------------------------------------------------------------------------------------------------------------------------------------------------------------------------------------------------------------------------------------------------------------------------------------------------------------------------------------|--|---------------|
| #787 | Kobayashi 2021 | <p>Characteristics of Cases with Poor Transcranial Motor-evoked Potentials Baseline Waveform Derivation in Spine Surgery: A Prospective Multicenter Study of the Monitoring Committee of the Japanese Society for Spine Surgery and Related Research.</p> | <p>Kobayashi, Kazuyoshi;<br/>         Imagama, Shiro; Ando, Kei;<br/>         Yoshida, Go; Ando, Muneharu;<br/>         Kawabata, Shigenori; Yamada, Kei; Kanchiku, Tsukasa;<br/>         Fujiwara, Yasushi; Taniguchi, Shinichirou; Iwasaki, Hiroshi;<br/>         Shigematsu, Hideki; Tadokoro, Nobuaki; Takahashi, Masahito;<br/>         Wada, Kanichiro; Yamamoto, Naoya; Funaba, Masahiro;<br/>         Yasuda, Akimasa; Ushirozako, Hiroki; Hashimoto, Jun; Morito, Shinji; Takatani, Nobunori;<br/>         Tani, Toshikazu; Matsuyama, Yukihiro</p> |  | Wrong Outcome |
|------|----------------|-----------------------------------------------------------------------------------------------------------------------------------------------------------------------------------------------------------------------------------------------------------|--------------------------------------------------------------------------------------------------------------------------------------------------------------------------------------------------------------------------------------------------------------------------------------------------------------------------------------------------------------------------------------------------------------------------------------------------------------------------------------------------------------------------------------------------------------|--|---------------|



|      |            |                                                                                                                                                                                                            |                                                                                                                                                                 |  |               |
|------|------------|------------------------------------------------------------------------------------------------------------------------------------------------------------------------------------------------------------|-----------------------------------------------------------------------------------------------------------------------------------------------------------------|--|---------------|
| #797 | Liu 2021   | The Prognostic Value of Intraoperative Neuromonitoring by Combining Somatosensory- and Motor-Evoked Potentials for Thoracic Spinal Decompression Surgery in Patients with Neurological Deficit.            | Liu, Tun; Dong, Buhuai; Qi, Huaguang; Yan, Liang; MD, PhD; Zhao, Songchuan; Liu, Zhian; Liu, Xuemei; Wang, Fei; Li, Liang; Cai, Wenbo; Luo, Zhenguo; Wang, Gang |  | Wrong Outcome |
| #799 | Zheng 2021 | Comparison of Intraoperative Neuromonitoring Outcome in Treating Thoracic Ossification of the Ligamentum Flavum Through En Bloc Versus Piecemeal Laminectomy.                                              | Zheng, Chaojun; Nie, Cong; Zhu, Yu; Tang, Susu; Jin, Xiang; Lyu, Feizhou; Jiang, Jianyuan; Ma, Xiaosheng                                                        |  | Wrong Outcome |
| #807 | Zhang 2021 | Multi-modal Neuroelectrophysiological Monitoring in the Treatment of Thoracic Tuberculosis with Debridement and Bone Grafting and Posterior Pedicle Screw Fixation via Costal Transverse Process Approach. | Zhang, Chen-wei; Shi, Shi-yuan; Tao, Xiao; Hu, Jin-ping; Cao, Tian-yi; Fei, Jun                                                                                 |  | Wrong Outcome |

|      |              |                                                                                                                                                                       |                                                                                                   |  |                          |
|------|--------------|-----------------------------------------------------------------------------------------------------------------------------------------------------------------------|---------------------------------------------------------------------------------------------------|--|--------------------------|
| #816 | Tanaka 2021  | Effect of Compound Muscle Action Potential After Peripheral Nerve Stimulation Normalization on Anesthetic Fade of Intraoperative Transcranial Motor-Evoked Potential. | Tanaka, Satoshi; Watanabe, Tomoko; Takanashi, Junko; Oka, Hidehiro; Hashimoto, Ryo; Akimoto, Jiro |  | Wrong Patient Population |
| #836 | Modi 2021    | Clinical Correlation of Intraoperative Neuromonitoring in 319 Individuals Undergoing Posterior Decompression and Fixation of Spine.                                   | Modi, Hitesh; MD, MS; Goel, Shakti; Desai, Yatin; Modi, Poonam                                    |  | Wrong Outcome            |
| #851 | Toll 2021    | Congenital Scoliosis of the Pediatric Cervical Spine: Characterization of a 17-Patient Operative Cohort.                                                              | Toll, Brandon; Samdani, Amer; Amanullah, Amir; Pahys, Joshua; Janjua, Muhammad; Hwang, Steven     |  | Wrong Outcome            |
| #856 | Magampa 2021 | Surgeon-directed transcranial motor evoked potential spinal cord monitoring in spinal deformity surgery: A REVIEW OF VIABILITY, SAFETY, AND EFFICACY.                 | Magampa, R.; Dunn, R.                                                                             |  | Wrong Outcome            |

|             |                       |                                                                                                                                                                                                                                                                        |                                                                                                                                                                                                                                                                                                                                                                                                |  |                      |
|-------------|-----------------------|------------------------------------------------------------------------------------------------------------------------------------------------------------------------------------------------------------------------------------------------------------------------|------------------------------------------------------------------------------------------------------------------------------------------------------------------------------------------------------------------------------------------------------------------------------------------------------------------------------------------------------------------------------------------------|--|----------------------|
| <p>#859</p> | <p>Kobayashi 2021</p> | <p>Efficacy of Intraoperative Intervention Following Transcranial Motor-evoked Potentials Alert During Posterior Decompression and Fusion Surgery for Thoracic Ossification of the Posterior Longitudinal Ligament: A Prospective Multicenter Study of the Monitor</p> | <p>Kobayashi, Kazuyoshi; MD, PhD; Imagama, Shiro; Yoshida, Go; Ando, Muneharu; Kawabata, Shigenori; Yamada, Kei; Kanchiku, Tsukasa; Fujiwara, Yasushi; Taniguchi, Shinichirou; Iwasaki, Hiroshi; Tadokoro, Nobuaki; Takahashi, Masahito; Wada, Kanichiro; Yamamoto, Naoya; Shigematsu, Hideki; Funaba, Masahiro; Yasuda, Akimasa; Ushirozako, Hiroki; Tani, Toshikazu; Matsuyama, Yukihiro</p> |  | <p>Wrong Outcome</p> |
| <p>#965</p> | <p>Tanaka 2019</p>    | <p>Muscle-evoked Potentials After Electrical Stimulation to the Brain in Patients Undergoing Spinal Surgery are Less Affected by Anesthetic Fade With Constant-voltage Stimulation Than With Constant-current Stimulation.</p>                                         | <p>Tanaka, Masato; Shigematsu, Hideki; MD, PhD; Kawaguchi, Masahiko; Hayashi, Hironobu; Takatani, Tsunenori; MT, PhD; Iwata, Eiichiro; Okuda, Akinori; Morimoto, Yasuhiko; Kawasaki, Sachiko; Masuda, Keisuke; Yamamoto, Yusuke; Tanaka, Yasuhito</p>                                                                                                                                          |  | <p>Wrong Outcome</p> |

|       |               |                                                                                                                                                                                      |                                                                                                                                                                                          |  |                       |
|-------|---------------|--------------------------------------------------------------------------------------------------------------------------------------------------------------------------------------|------------------------------------------------------------------------------------------------------------------------------------------------------------------------------------------|--|-----------------------|
| #978  | Wang 2019     | Survivals of the Intraoperative Motor-evoked Potentials Response in Pediatric Patients Undergoing Spinal Deformity Correction Surgery: What Are the Neurologic Outcomes of Surgery?. | Wang, Shujie; Li, Chaoxiong; Guo, Lanjun; Hu, Haimei; Jiao, Yang; Shen, Jianxiong; Tian, Ye; Zhang, Jianguo                                                                              |  | Paediatric population |
| #1000 | Levin 2019    | Intraoperative neuromonitoring in paediatric spinal surgery.                                                                                                                         | Levin, D.; Strantzas, S.; Steinberg, B.                                                                                                                                                  |  | Wrong Study Design    |
| #1042 | Ando 2019     | Wave Change of Intraoperative Transcranial Motor-Evoked Potentials During Corrective Fusion for Syndromic and Neuromuscular Scoliosis.                                               | Ando, Kei; Kobayashi, Kazuyoshi; Ito, Kenyu; Tsushima, Mikito; Morozumi, Masayoshi; Tanaka, Satoshi; Machino, Masaaki; Ota, Kyotaro; Nishida, Yoshihiro; Ishiguro, Naoki; Imagama, Shiro |  | Wrong Outcome         |
| #1064 | Ashayeri 2018 | Retrospective Analysis of EMG-evoked Potentials in Cortical Bone Trajectory Pedicle Screws.                                                                                          | Ashayeri, Kimberly; Sahasrabudhe, Nikhil; Galic, Vladimir; Beric, Aleksandar; Smith, Michael                                                                                             |  | Wrong Outcome         |

|       |              |                                                                                                                                      |                                                                            |  |               |
|-------|--------------|--------------------------------------------------------------------------------------------------------------------------------------|----------------------------------------------------------------------------|--|---------------|
| #1067 | Li 2018      | Clinical outcomes of posterior pedicle screw instrumentation without osteotomy in the management of adolescent idiopathic scoliosis. | Li, Ning; Xu, Chen; Shen, Ming-kui; Luo, Ming; Wang, Jie; Xia, Lei         |  | Wrong Outcome |
| #1073 | Chen 2018    | Factors Associated With Inadequate Intraoperative Baseline Lower Extremity Somatosensory Evoked Potentials.                          | Chen, Jonathan; Shilian, Parastou; Cheongsiatmoy, Justin; Gonzalez, Andres |  | Wrong Outcome |
| #1074 | Berends 2018 | Influence of the Montage of Stimulation Electrodes for Intraoperative Neuromonitoring During Orthopedic Spine Surgery.               | Berends, Hanneke; Journee, Henricus                                        |  | Wrong Outcome |

|       |           |                                                                                                                                                                                                            |                                                                                                                                                                                                                                                                                                                                                |  |               |
|-------|-----------|------------------------------------------------------------------------------------------------------------------------------------------------------------------------------------------------------------|------------------------------------------------------------------------------------------------------------------------------------------------------------------------------------------------------------------------------------------------------------------------------------------------------------------------------------------------|--|---------------|
| #1090 | Kato 2018 | An Analysis of the Incidence and Outcomes of Major Versus Minor Neurological Decline After Complex Adult Spinal Deformity Surgery: A Subanalysis of Scolio-RISK-1 Study.                                   | Kato, So; Fehlings, Michael; MD, PhD; FACS, FRCSC; Lewis, Stephen; MD, MSc; Lenke, Lawrence; Shaffrey, Christopher; Cheung, Kenneth; Carreon, Leah; Dekutoski, Mark; Schwab, Frank; Boachie-Adjei, Oheneba; Kebaish, Khaled; Ames, Christopher; Qiu, Yong; Matsuyama, Yukihiro; Dahl, Benny; Mehdian, Hossein; Pellise, Ferran; Berven, Sigurd |  | Wrong Outcome |
| #1163 | Wang 2017 | Proper Responding Strategies to Neuromonitoring Alerts During Correction Step in Posterior Vertebral Column Resection Patients With Severe Rigid Deformities Can Reduce Postoperative Neurologic Deficits. | Wang, Yingsong; Xie, Jingming; Zhao, Zhi; Li, Tao; Bi, Ni; Zhang, Ying; Shi, Zhiyue                                                                                                                                                                                                                                                            |  | Wrong Outcome |

|       |              |                                                                                                                                                 |                                                                                                                                                      |  |                    |
|-------|--------------|-------------------------------------------------------------------------------------------------------------------------------------------------|------------------------------------------------------------------------------------------------------------------------------------------------------|--|--------------------|
| #1169 | Hadley 2017  | Guidelines for the Use of Electrophysiological Monitoring for Surgery of the Human Spinal Column and Spinal Cord.                               | Hadley, Mark; Shank, Christopher; Rozzelle, Curtis; Walters, Beverly; C MD, MSc                                                                      |  | Wrong Study Design |
| #1192 | Cheah 2017   | Intraoperative Use of Neuromonitoring in Multilevel Thoracolumbar Spine Instrumentation and the Effects on Postoperative Neurological Injuries. | Cheah, Jonathan; Zhang, Alan; Tay, Bobby                                                                                                             |  | Wrong Outcome      |
| #1197 | Bartley 2017 | Perioperative and Delayed Major Complications Following Surgical Treatment of Adolescent Idiopathic Scoliosis.                                  | Bartley, Carrie; Yaszay, Burt; Bastrom, Tracey; Shah, Suken; Lonner, Baron; Asghar, Jahangir; Miyanji, Firoz; Samdani, Amer; Newton, Peter           |  | Wrong Intervention |
| #1198 | Ajiboye 2017 | Utility of Intraoperative Neuromonitoring for Lumbar Pedicle Screw Placement Is Questionable: A Review of 9957 Cases.                           | Ajiboye, Remi; Zoller, Stephen; D'Oro, Anthony; Burke, Zachary; Sheppard, William; Wang, Christopher; Buser, Zorica; Wang, Jeffrey; Pourtaheri, Sina |  | Wrong Outcome      |

|       |              |                                                                                                                                                                     |                                                                                                                                                                                                                                               |  |               |
|-------|--------------|---------------------------------------------------------------------------------------------------------------------------------------------------------------------|-----------------------------------------------------------------------------------------------------------------------------------------------------------------------------------------------------------------------------------------------|--|---------------|
| #1225 | Kim 2017     | Perioperative Neurologic Complications in Adult Spinal Deformity Surgery: Incidence and Risk Factors in 564 Patients.                                               | Kim, Han; Iyer, Sravisht; Zebala, Luke; Kelly, Michael; Sciubba, Daniel; Protopsaltis, Themistocles; Gupta, Munish; Neuman, Brian; Mundis, Gregory; Ames, Christopher; Smith, Justin; MD, PhD; Hart, Robert; Burton, Douglas; Klineberg, Eric |  | Wrong Outcome |
| #1231 | Appel 2017   | Efficacy of Head Repositioning in Restoration of Electrophysiological Signals During Cervical Spine Procedures.                                                     | Appel, Shmuel; Korn, Akiva; Biron, Tali; Goldstein, Kobi; Rand, Nahshon; Millgram, Michael; Floman, Yizhar; Ashkenazi, Ely                                                                                                                    |  | Wrong Outcome |
| #1246 | Ajiboye 2017 | Routine Use of Intraoperative Neuromonitoring During ACDFs for the Treatment of Spondylotic Myelopathy and Radiculopathy Is Questionable: A Review of 15,395 Cases. | Ajiboye, Remi; D'Oro, Anthony; Ashana, Adedayo; Buerba, Rafael; Lord, Elizabeth; Buser, Zorica; Wang, Jeffrey; Pourtaheri, Sina                                                                                                               |  | Wrong Outcome |



|       |              |                                                                                                                                                                         |                                                                                                                                                                                                            |  |               |
|-------|--------------|-------------------------------------------------------------------------------------------------------------------------------------------------------------------------|------------------------------------------------------------------------------------------------------------------------------------------------------------------------------------------------------------|--|---------------|
| #1276 | Wang 2016    | Deformity Angular Ratio Describes the Severity of Spinal Deformity and Predicts the Risk of Neurologic Deficit in Posterior Vertebral Column Resection Surgery.         | Wang, Xiao-bin; Lenke, Lawrence; Thuet, Earl; BS, CNIM; Blanke, Kathy; Koester, Linda; Roth, Michael                                                                                                       |  | Wrong Outcome |
| #1277 | Samdani 2016 | Reversible Intraoperative Neurophysiologic Monitoring Alerts in Patients Undergoing Arthrodesis for Adolescent Idiopathic Scoliosis: What Are the Outcomes of Surgery?. | Samdani, Amer; Bennett, James; Ames, Robert; Asghar, Jahangir; Orlando, Giuseppe; Pahys, Joshua; Yaszay, Burt; MiyANJI, Firoz; Lonner, Baron; Lehman, Ronald; Newton, Peter; Cahill, Patrick; Betz, Randal |  | Wrong Outcome |
| #1316 | Wang 2016    | Exploration of the Intraoperative Motor Evoked Potential.                                                                                                               | Wang, Shujie; Tian, Ye                                                                                                                                                                                     |  | Wrong Outcome |
| #1340 | Ney 2015     | Does intraoperative neurophysiologic monitoring matter in noncomplex spine surgeries?.                                                                                  | Ney, John; MD, MPH; van der Goes, David; Nuwer, Marc; MD, PhD                                                                                                                                              |  | Wrong Outcome |

|       |                |                                                                                                                                                          |                                                                                       |  |                          |
|-------|----------------|----------------------------------------------------------------------------------------------------------------------------------------------------------|---------------------------------------------------------------------------------------|--|--------------------------|
| #1352 | Erdogan 2015   | Effective Use of Multimodal Intraoperative Neuromonitoring in Neurosurgery.                                                                              | Erdogan, Ezgi; Karamursel, Sacit; Kiris, Talat                                        |  | Wrong Patient Population |
| #1415 | Gavrancic 2014 | Train-of-Four Test in Intraoperative Neurophysiologic Monitoring: Differences Between Hand and Foot Train-of-Four.                                       | Gavrancic, Brane; Lolis, Athena; Beric, Aleksandar                                    |  | Wrong Intervention       |
| #1419 | Zhu 2014       | Misplacement Pattern of Pedicle Screws in Pediatric Patients With Spinal Deformity: A Computed Tomography Study.                                         | Zhu, Feng; Sun, Xu; Qiao, Jun; Ding, Yitao; Zhang, Bing; Qiu, Yong                    |  | Wrong Outcome            |
| #1422 | Cole 2014      | Intraoperative Neuromonitoring in Single-Level Spinal Procedures: A Retrospective Propensity Score-Matched Analysis in a National Longitudinal Database. | Cole, Tyler; Veeravagu, Anand; Zhang, Michael; Li, Alexander; Ratliff, John; MD, FACS |  | Wrong Outcome            |

|       |            |                                                                                                                                                                                 |                                                                                                                                                                               |  |               |
|-------|------------|---------------------------------------------------------------------------------------------------------------------------------------------------------------------------------|-------------------------------------------------------------------------------------------------------------------------------------------------------------------------------|--|---------------|
| #1428 | Smith 2014 | Incidence of Lumbar Spine Pedicle Breach After Percutaneous Screw Fixation: A Radiographic Evaluation of 601 Screws in 151 Patients.                                            | Smith, Zachary; Sugimoto, Koichi; Lawton, Cort; Fessler, Richard; MD, PhD                                                                                                     |  | Wrong Outcome |
| #1431 | Chong 2014 | Direct Comparison of the Effect of Desflurane and Sevoflurane on Intraoperative Motor-evoked Potentials Monitoring.                                                             | Chong, Chin; Ted MBBS, MMed; Manninen, Pirjo; MD, FRCPC; Sivanaser, Vanitha; MBBS, MMed; Subramanyam, Rajeev; MD, DNB; MNAMS, MS; Lu, Nancy; Venkatraghavan, Lashmi; MD, FRCA |  | Wrong Outcome |
| #1466 | Dede 2014  | Using the Freehand Pedicle Screw Placement Technique in Adolescent Idiopathic Scoliosis Surgery: What Is the Incidence of Neurological Symptoms Secondary to Misplaced Screws?. | Dede, Ozgur; Ward, William; Bosch, Patrick; Bowles, Austin; Roach, James                                                                                                      |  | Wrong Outcome |

|       |              |                                                                                                                                                                                 |                                                                                                                                  |  |                    |
|-------|--------------|---------------------------------------------------------------------------------------------------------------------------------------------------------------------------------|----------------------------------------------------------------------------------------------------------------------------------|--|--------------------|
| #1482 | Shah 2013    | Transcranial motor evoked potential monitoring outcome in the high-risk brain and spine surgeries: Correlation of clinical and neurophysiological data - An Indian perspective. | Shah, Poornima                                                                                                                   |  | Wrong Outcome      |
| #1553 | Imam 2013    | Spinal N22 in diagnosing lumbosacral radiculopathy.                                                                                                                             | Imam, Mohamed; Hassan, Marwa                                                                                                     |  | Wrong Intervention |
| #1578 | Michael 2012 | Intraoperative Neuromonitoring in Spine Surgery.                                                                                                                                | Michael, Keith; Boden, Scott                                                                                                     |  | Wrong Study Design |
| #1610 | deBlas 2012  | Safe Pedicle Screw Placement in Thoracic Scoliotic Curves Using t-EMG: Stimulation Threshold Variability at Concavity and Convexity in Apex Segments.                           | de Blas, Gema; MD, PhD; Barrios, Carlos; Regidor, Ignacio; Montes, Elena; Burgos, Jesus; Piza-Vallespir, Gabriel; Hevia, Eduardo |  | Wrong Outcome      |
| #1659 | Ovadia 2011  | The Contribution of an Electronic Conductivity Device to the Safety of Pedicle Screw Insertion in Scoliosis Surgery.                                                            | Ovadia, Dror; Korn, Akiva; Fishkin, Michael; Steinberg, David; Wientroub, Shlomo; Ofiram, Elisha                                 |  | Wrong Outcome      |

|       |                |                                                                                                                                                 |                                                                                                                                                                         |  |                    |
|-------|----------------|-------------------------------------------------------------------------------------------------------------------------------------------------|-------------------------------------------------------------------------------------------------------------------------------------------------------------------------|--|--------------------|
| #1698 | Parker 2011    | Accuracy of Free-Hand Pedicle Screws in the Thoracic and Lumbar Spine: Analysis of 6816 Consecutive Screws.                                     | Parker, Scott; McGirt, Matthew; Farber, S; Amin, Anubhav; Rick, Anne-Marie; Suk, Ian; Bydon, Ali; Sciubba, Daniel; Wolinsky, Jean-Paul; Gokaslan, Ziya; Witham, Timothy |  | Wrong Intervention |
| #1742 | Modi 2010      | Accuracy of Thoracic Pedicle Screw Using Ideal Pedicle Entry Point in Severe Scoliosis.                                                         | Modi, Hitesh; MS, PhD; Suh, Seung-Woo; MD, PhD; 1, a; Hong, Jae-Young; Yang, Jae-Hyuk                                                                                   |  | Wrong Outcome      |
| #1754 | Ayhan 2010     | Transthoracic Surgical Treatment for Centrally Located Thoracic Disc Herniations Presenting With Myelopathy: A 5-year Institutional Experience. | Ayhan, Selim; Nelson, Clarke; Gok, Beril; Petteys, Rory; Wolinsky, Jean-Paul; Witham, Timothy; Bydon, Ali; Gokaslan, Ziya; Sciubba, Daniel                              |  | Wrong Outcome      |
| #1767 | Takahashi 2010 | Accuracy of Multilevel Registration in Image-Guided Pedicle Screw Insertion for Adolescent Idiopathic Scoliosis.                                | Takahashi, Jun; Hirabayashi, Hiroki; Hashidate, Hiroyuki; Ogiwara, Nobuhide; Kato, Hiroyuki                                                                             |  | Wrong Outcome      |

|       |                |                                                                                                                                                       |                                                                       |             |                          |
|-------|----------------|-------------------------------------------------------------------------------------------------------------------------------------------------------|-----------------------------------------------------------------------|-------------|--------------------------|
| #1771 | Duffy 2010     | Usefulness of Electromyography Compared to Computed Tomography Scans in Pedicle Screw Placement.                                                      | Duffy, Michael; Phillips, Jonathan; Knapp, Dennis; Herrera-Soto, Jose |             | Wrong Outcome            |
| #1786 | Castellon 2009 | Intraoperative Neurophysiologic Spinal Cord Monitoring in Thoracolumbar Burst Fractures.                                                              | Castellon, Alfredo; Meves, Robert; Avanzi, Osmar                      |             | Wrong Outcome            |
| #1791 | Hart 2009      | Intraoperative Neuromonitoring in Pediatric Spinal Deformity Surgery.                                                                                 | Hart, Erin; Grottkau, Brian                                           |             | Wrong Study Design       |
| #1800 | Xu 2009        | Sensitivity and efficacy of intraoperative electromyography monitoring in combination with 3D imaging modality during complex lumbosacral procedures. | Xu, Feng; Yu, Xing; Bi, Lian-yong; Gao, Fei; Ke, Hai; Xu, Lin         | Ne: Symbol. | Full Text Not in English |

|       |                 |                                                                                                                                                                                          |                                                                                                                                                                                                      |  |                    |
|-------|-----------------|------------------------------------------------------------------------------------------------------------------------------------------------------------------------------------------|------------------------------------------------------------------------------------------------------------------------------------------------------------------------------------------------------|--|--------------------|
| #1819 |                 | Motor and Somatosensory Evoked Potentials Are Well Maintained in Patients Given Dexmedetomidine During Spine Surgery.                                                                    |                                                                                                                                                                                                      |  | Wrong Outcome      |
| #1850 | Dimopoulos 2009 | Quantitative Estimation of the Recurrent Laryngeal Nerve Irritation by Employing Spontaneous Intraoperative Electromyographic Monitoring During Anterior Cervical Discectomy and Fusion. | Dimopoulos, Vasilios; Chung, Induk; Lee, Gregory; Johnston, Kim; MD, FACS; Kapsalakis, Ioannis; Smisson, Hugh; III MD, FACS; Grigorian, Arthur; MD, PhD; Robinson, Joe; Jr MD, FACS; Fountas, Kostas |  | Wrong Intervention |
| #1869 | TOBIAS 2008     | Effects of dexmedetomidine on intraoperative motor and somatosensory evoked potential monitoring during spinal surgery in adolescents.                                                   | TOBIAS, JOSEPH; GOBLE, TIMOTHY; BATES, GUY; ANDERSON, JOHN; HOERNSCHEMEYER, DANIEL                                                                                                                   |  | Wrong Outcome      |
| #1882 | Bala 2008       | Motor and Somatosensory Evoked Potentials Are Well Maintained in Patients Given Dexmedetomidine during Spine Surgery.                                                                    | Bala, Endrit; Sessler, Daniel; Nair, Dileep; McLain, Robert; Dalton, Jarrod; Farag, Ehab                                                                                                             |  | Wrong Outcome      |

|       |              |                                                                                                                                                   |                                                                                                                          |  |               |
|-------|--------------|---------------------------------------------------------------------------------------------------------------------------------------------------|--------------------------------------------------------------------------------------------------------------------------|--|---------------|
| #1901 | Donohue 2008 | Pulse-Train Stimulation for Detecting Medial Malpositioning of Thoracic Pedicle Screws.                                                           | Donohue, Miriam; Murtagh-Schaffer, Catherine; Basta, John; Moquin, Ross; Bashir, Asif; Calancie, Blair                   |  | Wrong Outcome |
| #1906 | Sakai 2008   | Segmental Pedicle Screwing for Idiopathic Scoliosis Using Computer-assisted Surgery.                                                              | Sakai, Yoshihito; Matsuyama, Yukihiro; Nakamura, Hiroshi; Katayama, Yoshito; Imagama, Shiro; Ito, Zenya; Ishiguro, Naoki |  | Wrong Outcome |
| #1925 | Anschel 2008 | Successful Intraoperative Spinal Cord Monitoring During Scoliosis Surgery Using a Total Intravenous Anesthetic Regimen Including Dexmedetomidine. | Anschel, David; Aherne, Andrew; Soto, Roy; Carrion, Wesley; Hoegerl, Carl; Nori, Palgun; Seidman, Peggy                  |  | Wrong Outcome |
| #1937 | Lehman 2007  | Computed Tomography Evaluation of Pedicle Screws Placed in the Pediatric Deformed Spine Over an 8-Year Period.                                    | Lehman, Ronald; Lenke, Lawrence; Keeler, Kathryn; Kim, Yongjung; Cheh, Gene                                              |  | Wrong Outcome |



|       |             |                                                                                                                                                                                                 |                                                                                                                           |  |               |
|-------|-------------|-------------------------------------------------------------------------------------------------------------------------------------------------------------------------------------------------|---------------------------------------------------------------------------------------------------------------------------|--|---------------|
| #1970 |             | The Use of Somatosensory Evoked Potentials to Determine the Relationship Between Patient Positioning and Impending Upper Extremity Nerve Injury During Spine Surgery: A Retrospective Analysis. |                                                                                                                           |  | Wrong Outcome |
| #1995 | Tanaka 2006 | Postoperative Segmental C5 Palsy After Cervical Laminoplasty May Occur Without Intraoperative Nerve Injury: A Prospective Study With Transcranial Electric Motor-Evoked Potentials.             | Tanaka, Nobuhiro; MD, PhD; Nakanishi, Kazuyoshi; Fujiwara, Yasushi; Kamei, Naosuke; Ochi, Mitsuo                          |  | Wrong Outcome |
| #2027 | Sala 2006   | Motor Evoked Potential Monitoring Improves Outcome after Surgery for Intramedullary Spinal Cord Tumors: A Historical Control Study.                                                             | Sala, Francesco; Palandri, Giorgio; Basso, Elisabetta; Lanteri, Paola; Deletis, Vedran; Faccioli, Franco; Bricolo, Albino |  | Wrong Outcome |

|       |               |                                                                                                                                                      |                                                                                                     |  |                          |
|-------|---------------|------------------------------------------------------------------------------------------------------------------------------------------------------|-----------------------------------------------------------------------------------------------------|--|--------------------------|
| #2072 | Smorgick 2005 | Accuracy and Safety of Thoracic Pedicle Screw Placement in Spinal Deformities.                                                                       | Smorgick, Yossi; Millgram, Michael; Anekstein, Yoram; Floman, Yizhar; Mirovsky, Yigal               |  | Wrong Outcome            |
| #2085 | Thuet 2005    | Increased Risk of Postoperative Neurologic Deficit for Spinal Surgery Patients With Unobtainable Intraoperative Evoked Potential Data.               | Thuet, Earl; Padberg, Anne; Raynor, Barry; Bridwell, Keith; Riew, K; Taylor, Brett; Lenke, Lawrence |  | Wrong Outcome            |
| #2127 | Liu 2005      | Effects of isoflurane and propofol on cortical somatosensory evoked potentials during comparable depth of anaesthesia as guided by bispectral index. | Liu, E.; Wong, H.; Chia, C.; Lim, H.; Chen, Z.; Lee, T.                                             |  | Wrong Patient Population |
| #2186 | Kim 2004      | Free Hand Pedicle Screw Placement in the Thoracic Spine: Is it Safe?                                                                                 | Kim, Yongjung; Lenke, Lawrence; Bridwell, Keith; Cho, Yongsun; Riew, K.                             |  | Wrong Outcome            |

|       |            |                                                                                                                                               |                                                                                                                                                                        |  |                    |
|-------|------------|-----------------------------------------------------------------------------------------------------------------------------------------------|------------------------------------------------------------------------------------------------------------------------------------------------------------------------|--|--------------------|
| #2203 | Rohde 2003 | Measurement of motor evoked potentials following repetitive magnetic motor cortex stimulation during isoflurane or propofol anaesthesia.      | Rohde, V.; Krombach, G.; Baumert, J.; Kreitschmann-Andermahr, I.; Weinzierl, M.; Gilsbach, J.                                                                          |  | Wrong Intervention |
| #2225 | Shi 2003   | Electrical Stimulation for Intraoperative Evaluation of Thoracic Pedicle Screw Placement.                                                     | Shi, Yong-bing; MD, PhD; Binette, Michael; Martin, William; Pearson, James; Hart, Robert                                                                               |  | Wrong Outcome      |
| #2236 | Aglia 2002 | The Use of Transcranial Magnetic Stimulation for Monitoring Descending Spinal Cord Motor Function.                                            | Aglia, Linda; Romero, Rafael; Desai, Sukumar; Ramirez, Marcela; Gonzalez, Andres; Gugino, Laverne; MD, PhD                                                             |  | Wrong Outcome      |
| #2246 | Inoue 2002 | Intraoperative Monitoring of Myogenic Motor-Evoked Potentials From the External Anal Sphincter Muscle to Transcranial Electrical Stimulation. | Inoue, Satoki; Kawaguchi, Masahiko; Takashi, Shimoda; Kakimoto, Meiko; Sakamoto, Takanori; Kitaguchi, Katsuyasu; Furuya, Hitoshi; Morimoto, Tetsuya; Sakaki, Toshisuke |  | Wrong Outcome      |

|       |                    |                                                                                                                                                                      |                                                                                                                                                   |  |                    |
|-------|--------------------|----------------------------------------------------------------------------------------------------------------------------------------------------------------------|---------------------------------------------------------------------------------------------------------------------------------------------------|--|--------------------|
| #2269 | Ku 2002            | Effect of sevoflurane/nitrous oxide versus propofol anaesthesia on somatosensory evoked potential monitoring of the spinal cord during surgery to correct scoliosis. | Ku, A.; Hu, Y.; Irwin, M.; Chow, B.; Gunawardene, S.; Tan, E.; Luk, K.                                                                            |  | Wrong Outcome      |
| #2291 | Reidy 2001         | Evaluation of electromyographic monitoring during insertion of thoracic pedicle screws.                                                                              | Reidy, D.; Houlden, D.; Nolan, P.; Kim, M.; Finkelstein, J.                                                                                       |  | Wrong Outcome      |
| #2328 | Wilson-Holden 2000 | A Prospective Comparison of Neurogenic Mixed Evoked Potential Stimulation Methods: Utility of Epidural Elicitation During Posterior Spinal Surgery.                  | Wilson-Holden, Tracy; Padberg, Anne; Parkinson, Jeffery; Bridwell, Keith; Lenke, Lawrence; Bassett, George                                        |  | Wrong Intervention |
| #2334 | Toleikis 2000      | The Usefulness of Electrical Stimulation for Assessing Pedicle Screw Placements.                                                                                     | Toleikis, J.; Skelly, Jon; Carlvin, Arnold; Toleikis, Sandra; Bernard, Thomas; Burkus, J.; Burr, Max; Dorchak, John; Goldman, Marc; Walsh, Thomas |  | Wrong Outcome      |

|       |              |                                                                                                                                             |                                                                                                       |  |                    |
|-------|--------------|---------------------------------------------------------------------------------------------------------------------------------------------|-------------------------------------------------------------------------------------------------------|--|--------------------|
| #2360 | Owen 1999    | The Application of Intraoperative Monitoring During Surgery for Spinal Deformity.                                                           | Owen, Jeffrey                                                                                         |  | Wrong Study Design |
| #2385 | Laureau 1999 | Comparative Study of Propofol and Midazolam Effects on Somatosensory Evoked Potentials during Surgical Treatment of Scoliosis.              | Laureau, Emmanuele; Marciniak, Bruno; Hebrard, Anne; Herbaux, Bernard; Guieu, Jean                    |  | Wrong Outcome      |
| #2394 | Ubags 1999   | A Comparison of Myogenic Motor Evoked Responses to Electrical and Magnetic Transcranial Stimulation During Nitrous Oxide/Opioid Anesthesia. | Ubags, Leon; MD, PhD; Kalkman, Cor; Been, Henk; Koelman, Johannes; de Visser, Bram; Ongerboer MD, PhD |  | Wrong Outcome      |
| #2418 | Balzer 1998  | Simultaneous Somatosensory Evoked Potential and Electromyographic Recordings during Lumbosacral Decompression and Instrumentation.          | Balzer, Jeffrey; Rose, Robert; Welch, William; Sciabassi, Robert; MD, PhD                             |  | Wrong Outcome      |

|       |                    |                                                                                                                   |                                                                                                                                           |  |                    |
|-------|--------------------|-------------------------------------------------------------------------------------------------------------------|-------------------------------------------------------------------------------------------------------------------------------------------|--|--------------------|
| #2426 | Cheng 1998         | Posterior Tibial Nerve Somatosensory Cortical Evoked Potentials in Adolescent Idiopathic Scoliosis.               | Cheng, Jack; MBBS, FRCS; FACS, FHKAM; Guo, Xia; Sher, Andy                                                                                |  | Wrong Outcome      |
| #2428 | Darden 1998        | A Comparison of Impedance and Electromyogram Measurements in Detecting the Presence of Pedicle Wall Breakthrough. | Darden, Bruce; Owen, Jeffrey; Hatley, Martha; Kostuik, John; Tooke, S.                                                                    |  | Wrong Outcome      |
| #2431 | Vedran 1997        | The Role of Motor Evoked Potentials during Surgery for Intramedullary Spinal Cord Tumors.                         | Vedran MD, PhD                                                                                                                            |  | Wrong Outcome      |
| #2449 | Schwarzenbach 1997 | Accuracy of Computer-Assisted Pedicle Screw Placement: An In Vivo Computed Tomography Analysis.                   | Schwarzenbach, Othmar; Berlemann, Ulrich; Jost, Bernhard; Visarius, Heiko; Arm, Erich; Langlotz, Frank; Nolte, Lutz-P.; Ozdoba, Christoph |  | Wrong Intervention |

|       |                |                                                                                                                                                              |                                                                                                 |  |               |
|-------|----------------|--------------------------------------------------------------------------------------------------------------------------------------------------------------|-------------------------------------------------------------------------------------------------|--|---------------|
| #2460 | Bernard 1996   | Effects of Isoflurane and Desflurane on Neurogenic Motor- and Somatosensory-evoked Potential Monitoring for Scoliosis Surgery.                               | Bernard, Jean-Marc; MD, PhD; Pereon, Yann; Fayet, Guillemette; Guiheneuc, Pierre                |  | Wrong Outcome |
| #2468 | Pechstein 1996 | Transcranial High-frequency Repetitive Electrical Stimulation for Recording Myogenic Motor Evoked Potentials with the Patient under General Anesthesia.      | Pechstein, Ulrich; Cedzich, Cornelia; Nadstawek, Joachim; Schramm, Johannes                     |  | Wrong Outcome |
| #2475 | Woodforth 1996 | Variability of Motor-Evoked Potentials Recorded During Nitrous Oxide Anesthesia from the Tibialis Anterior Muscle After Transcranial Electrical Stimulation. | Woodforth, Ian; MB, BS; Hicks, Richard; Crawford, Matthew; Stephen, John; Burke, David; MD, DSc |  | Wrong Outcome |
| #2483 | Dennis 1996    | Monitoring of Median Nerve Somatosensory Evoked Potentials During Cervical Spinal Cord Decompression.                                                        | Dennis, G.; Dehkordi, O.; Millis, R.; Cole, A.; Brown, D.; Paul, O.                             |  | Wrong Outcome |

|       |                |                                                                                                                                                                               |                                                                                                  |                                            |                    |
|-------|----------------|-------------------------------------------------------------------------------------------------------------------------------------------------------------------------------|--------------------------------------------------------------------------------------------------|--------------------------------------------|--------------------|
| #2491 | Lee 1995       | Intraoperative Monitoring of Motor Function by Magnetic Motor Evoked Potentials.                                                                                              | Lee, Wei-Yuh; Hou, Wen-Yeong; Yang, Lin-Huse; Lin, Swei-Ming                                     |                                            | Wrong Intervention |
| #2496 | Koyanagi 1993  | Spinal Cord Evoked Potential Monitoring after Spinal Cord Stimulation during Surgery of Spinal Cord Tumors.                                                                   | Koyanagi, Izumi; Iwasaki, Yoshinobu; Isu, Toyohiko; Abe, Hiroshi; Akino, Minoru; Kuroda, Satoshi |                                            | Wrong Intervention |
| #2498 | Rappaport 1992 | Effects of Anesthesia and Stimulus Intensity on Posterior Tibial Nerve Somatosensory Evoked Potentials.                                                                       | Rappaport, Maurice; Leonard, Jill; Portillo, Sarbelio                                            |                                            | Wrong Outcome      |
| #2504 | DVORAK 1990    | Motor-Evoked Potentials in Patients with Cervical Spine Disorders.                                                                                                            | DVORAK, JIRI; HERDMANN, JORG; JANSSEN, BEATRICE; THEILER, ROBERT; GROB, DIETER                   |                                            | Wrong Intervention |
| #2517 | Min 2018       | Accuracy of thoracic pedicle screw placement using freehand technique and triggered EMG in adolescent idiopathic scoliosis: Is it different between concave and convex side?. | Min, Woo-Kie; Na, Sang-Bong; Jang, Jin-An                                                        | Journal of orthopaedic surgery (Hong Kong) | Wrong Outcome      |



|       |               |                                                                                                                                                              |                                                                                                                                                         |                                                                                                                                                                                     |               |
|-------|---------------|--------------------------------------------------------------------------------------------------------------------------------------------------------------|---------------------------------------------------------------------------------------------------------------------------------------------------------|-------------------------------------------------------------------------------------------------------------------------------------------------------------------------------------|---------------|
| #2523 | Iacopino 2017 | EMG-Guided Percutaneous Placement of Cement-Augmented Pedicle Screws for Osteoporotic Thoracolumbar Burst Fractures.                                         | Iacopino, Domenico Gerardo; Certo, Francesco; Graziano, Francesca; Basile, Luigi; Guli, Carlo; Visocchi, Massimiliano; Conti, Alfredo; Maugeri, Rosario | Acta neurochirurgica. Supplement                                                                                                                                                    | Wrong Outcome |
| #2529 | Kumar 2014    | Elevated preoperative blood pressure predicts the intraoperative loss of SSEP neuromonitoring signals during spinal surgery.                                 | Kumar, Akash; Chen, Yuangen; Lin, Hung-Mo; Deiner, Stacie                                                                                               | Journal of clinical monitoring and computing                                                                                                                                        | Wrong Outcome |
| #2532 | Holdefer 2013 | Utility of evoked EMG monitoring to improve bone screw placements in the cervical spine.                                                                     | Holdefer, Robert N; Heffez, Daniel S; Cohen, Bernard A                                                                                                  | Journal of spinal disorders & techniques                                                                                                                                            | Wrong Outcome |
| #2538 | Regidor 2011  | Recording triggered EMG thresholds from axillary chest wall electrodes: a new refined technique for accurate upper thoracic (T2-T6) pedicle screw placement. | Regidor, Ignacio; de Blas, Gema; Barrios, Carlos; Burgos, Jesus; Montes, Elena; Garcia-Urquiza, Sergio; Hevia, Eduardo                                  | European spine journal : official publication of the European Spine Society, the European Spinal Deformity Society, and the European Section of the Cervical Spine Research Society | Wrong Outcome |

|       |              |                                                                                                                                                               |                                                                                                                                         |                                                                                                                                                                                     |               |
|-------|--------------|---------------------------------------------------------------------------------------------------------------------------------------------------------------|-----------------------------------------------------------------------------------------------------------------------------------------|-------------------------------------------------------------------------------------------------------------------------------------------------------------------------------------|---------------|
| #2540 | Samdani 2011 | Triggered electromyography for placement of thoracic pedicle screws: is it reliable?.                                                                         | Samdani, Amer F; Tantorski, Mark; Cahill, Patrick J; Ranade, Ashish; Koch, Stephen; Clements, David H; Betz, Randal R; Asghar, Jahangir | European spine journal : official publication of the European Spine Society, the European Spinal Deformity Society, and the European Section of the Cervical Spine Research Society | Wrong Outcome |
| #2543 | Drake 2010   | Intraoperative neurophysiological monitoring during complex spinal deformity cases in pediatric patients: methodology, utility, prognostication, and outcome. | Drake, James; Zeller, Reinhard; Kulkarni, Abhaya V; Strantzas, Samuel; Holmes, Laura                                                    | Child's nervous system : ChNS : official journal of the International Society for Pediatric Neurosurgery                                                                            | Wrong Outcome |
| #2549 | Zaarour 2007 | Effect of low-dose ketamine on voltage requirement for transcranial electrical motor evoked potentials in children.                                           | Zaarour, Christian; Engelhardt, Thomas; Strantzas, Samuel; Pehora, Carolyne; Lewis, Stephen; Crawford, Mark W                           | Spine                                                                                                                                                                               | Wrong Outcome |
| #2551 | Sutter 2007  | Multimodal intraoperative monitoring: an overview and proposal of methodology based on 1,017 cases.                                                           | Sutter, Martin; Eggspuehler, Andreas; Muller, Alfred; Dvorak, Jiri                                                                      | European spine journal : official publication of the European Spine Society, the European Spinal Deformity Society, and the European                                                | Wrong Outcome |

|       |              |                                                                                                     |                                                                     |                                                                                                            |                    |
|-------|--------------|-----------------------------------------------------------------------------------------------------|---------------------------------------------------------------------|------------------------------------------------------------------------------------------------------------|--------------------|
|       |              |                                                                                                     |                                                                     | Section of the Cervical Spine Research Society                                                             |                    |
| #2558 | Bose 2004    | Neurophysiological monitoring of spinal cord function during instrumented anterior cervical fusion. | Bose, Bikash; Sestokas, Anthony K; Schwartz, Daniel M               | The spine journal : official journal of the North American Spine Society                                   | Wrong Outcome      |
| #2564 | Cioni 1999   | Intraoperative motor evoked potentials monitoring in spinal neurosurgery.                           | Cioni, B; Meglio, M; Rossi, G F                                     | Archives italiennes de biologie                                                                            | Wrong Study Design |
| #2569 | Maguire 1995 | Evaluation of intrapedicular screw position using intraoperative evoked electromyography.           | Maguire, J; Wallace, S; Madiga, R; Leppanen, R; Draper, V           | Spine                                                                                                      | Wrong Outcome      |
| #2570 | Erwin 1993   | Up and down the spinal cord: intraoperative monitoring of sensory and motor spinal cord pathways.   | Erwin, C W; Erwin, A C                                              | Journal of clinical neurophysiology : official publication of the American Electroencephalographic Society | Wrong Study Design |
| #285  | Agarwal 2017 | Intraoperative Neurophysiologic Monitoring                                                          | Agarwal N.; Hamilton D.K.; Ozpinar A.; Choi P.; Hart R.; Yaylali I. | World Neurosurgery                                                                                         | No 2x2             |

|       |               |                                                                                                                                                                             |                                                                                                                                                |                                            |               |
|-------|---------------|-----------------------------------------------------------------------------------------------------------------------------------------------------------------------------|------------------------------------------------------------------------------------------------------------------------------------------------|--------------------------------------------|---------------|
|       |               | for Adult Patients Undergoing Posterior Spinal Fusion                                                                                                                       |                                                                                                                                                |                                            |               |
| #169  | Barsotti 2020 | Diagnostic accuracy of perioperative electromyography in the positioning of pedicle screws in adolescent idiopathic scoliosis treatment: A cross-sectional diagnostic study | Barsotti C.E.; Gavassi B.M.; Prado F.E.; Batista B.N.; De Resende Pratali R.; Ribeiro A.P.; De Oliveira C.E.S.; Ferreira R.R.                  | BMC Musculoskeletal Disorders              | No 2x2        |
| #1904 | Cheh 2008     | Loss of Spinal Cord Monitoring Signals in Children During Thoracic Kyphosis Correction With Spinal Osteotomy: Why Does It Occur and What Should You Do?                     | Cheh, Gene; Lenke, Lawrence; Padberg, Anne; MS, CCC-A; Kim, Yongjung; Daubs, Michael; MD, FACS; Kuhns, Craig; Stobbs, Georgia; Hensley, Marsha |                                            | Wrong Outcome |
| #41   | Chen 2013     | Comparison of the wake-up test and combined TES-MEP and CSEP monitoring in spinal surgery                                                                                   | Chen B.; Chen Y.; Yang J.; Xie D.; Su H.; Li F.; Wan Y.; Peng X.; Zheng Z.                                                                     | Journal of Spinal Disorders and Techniques | Wrong Outcome |

|      |                     |                                                                                                                                                  |                                                                                                                                                                             |                                     |        |
|------|---------------------|--------------------------------------------------------------------------------------------------------------------------------------------------|-----------------------------------------------------------------------------------------------------------------------------------------------------------------------------|-------------------------------------|--------|
| #756 | Chen 2022           | Intraoperative<br>Neuromonitoring Auxiliary<br>Significance of DNEP for<br>MEP-positive Event During<br>Severe Spinal Deformity<br>Surgery.      | Chen, Jian; Deng, Yao-long;<br>Sui, Wen-yuan; Yang, Jing-fan;<br>MD, PhD; Xu, Jing; Huang, Zi-<br>fang; Yang, Jun-lin                                                       |                                     | No 2x2 |
| #168 | Cousino 2020        | Anterolateral S1 screw<br>malposition detected with<br>intraoperative<br>neurophysiological monitoring<br>during posterior lumbosacral<br>fusion | Cousino J.P.C.; Luna F.; Torche<br>M.; Viguera S.; Torche E.;<br>Valdes G.                                                                                                  | Surgical Neurology<br>International | No 2x2 |
| #828 | Krzeptowsky<br>2021 | Neurophysiological<br>Intraoperative Monitoring in<br>the Elderly.                                                                               | De la Maza Krzeptowsky, Lilia;<br>San-Juan, Daniel; Ximenez<br>Camilli, Cecilia; Alvarez Perera,<br>Luis; Valdez Ruvalcaba, Hector;<br>Morales Baez, Jorge; Ansel,<br>David |                                     | No 2x2 |

|       |                |                                                                                                                                                                            |                                                                                                                                                                                                                                    |       |               |
|-------|----------------|----------------------------------------------------------------------------------------------------------------------------------------------------------------------------|------------------------------------------------------------------------------------------------------------------------------------------------------------------------------------------------------------------------------------|-------|---------------|
| #1676 | Hamilton 2011  | Rates of New Neurological Deficit Associated With Spine Surgery Based on 108,419 Procedures: A Report of the Scoliosis Research Society Morbidity and Mortality Committee. | Hamilton, D.; Smith, Justin; MD, PhD; Sansur, Charles; MD, MHSc; Glassman, Steven; Ames, Christopher; Berven, Sigurd; Polly, David; Perra, Joseph; Knapp, Dennis; Boachie-Adjei, Oheneba; McCarthy, Richard; Shaffrey, Christopher |       | No 2x2        |
| #2234 | Hu 2003        | Application of time-frequency analysis to somatosensory evoked potential for intraoperative spinal cord monitoring.                                                        | Hu, Y; Luk, K; Lu, W; Leong, J                                                                                                                                                                                                     |       | Wrong Outcome |
| #144  | Kobayashi 2021 | Effects of Preoperative Motor Status on Intraoperative Motor-evoked Potential Monitoring for High-risk Spinal Surgery: A Prospective Multicenter Study                     | Kobayashi K.; Imagama S.; Yoshida G.; Ando M.; Kawabata S.; Yamada K.; Kanchiku T.; Fujiwara Y.; Taniguchi S.; Iwasaki H.; Tadokoro N.; Takahashi M.; Wada K.; Yamamoto N.; Shigematsu H.; Funaba M.; Yasuda A.; Kobayashi S.;     | Spine | Wrong Outcome |

|      |                |                                                                                                                                                                                  |                                                                                                                           |                                          |                       |
|------|----------------|----------------------------------------------------------------------------------------------------------------------------------------------------------------------------------|---------------------------------------------------------------------------------------------------------------------------|------------------------------------------|-----------------------|
|      |                |                                                                                                                                                                                  | Ushirozako H.; Tani T.;<br>Matsuyama Y.                                                                                   |                                          |                       |
| #234 | Lakomkin 2018  | Utility of Intraoperative<br>Monitoring in the Resection of<br>Spinal Cord Tumors                                                                                                | Lakomkin N.; Mistry A.M.;<br>Zuckerman S.L.; Ladner T.;<br>Kothari P.; Lee N.J.; Stannard<br>B.; Vasquez R.A.; Cheng J.S. | Spine                                    | Wrong<br>Intervention |
| #201 | Lieberman 2019 | The reliability of motor evoked<br>potentials to predict<br>dorsiflexion injuries during<br>lumbosacral deformity surgery:<br>importance of multiple<br>myotomal monitoring      | Lieberman J.A.; Lyon R.;<br>Jasiukaitis P.; Berven S.H.;<br>Burch S.; Feiner J.                                           | Spine Journal                            | Wrong Outcome         |
| #292 | Morishige 2017 | Application of compound<br>action potential of facial<br>muscles evoked by transcranial<br>stimulation as a reference<br>waveform of motor-evoked<br>potential in spinal surgery | Morishige M.; Takeda M.;<br>Yamaguchi S.; Sugiyama K.;<br>Kurusu K.                                                       | Hiroshima Journal of<br>Medical Sciences | Wrong<br>Intervention |

|       |                      |                                                                                                                                                                           |                                                                                                                                                                  |                                   |               |
|-------|----------------------|---------------------------------------------------------------------------------------------------------------------------------------------------------------------------|------------------------------------------------------------------------------------------------------------------------------------------------------------------|-----------------------------------|---------------|
| #2388 | Norcross-Nechay 1999 | Intraoperative Somatosensory Evoked Potential Findings in Acute and Chronic Spinal Canal Compromise.                                                                      | Norcross-Nechay, Karyl; MD, PhD; Mathew, Titus; Simmons, James; Hadjipavlou, Alexander                                                                           |                                   | No 2x2        |
| #2537 | Parker 2011          | Ability of electromyographic monitoring to determine the presence of malpositioned pedicle screws in the lumbosacral spine: analysis of 2450 consecutively placed screws. | Parker, Scott L; Amin, Anubhav G; Farber, S Harrison; McGirt, Matthew J; Sciubba, Daniel M; Wolinsky, Jean-Paul; Bydon, Ali; Gokaslan, Ziya L; Witham, Timothy F | Journal of neurosurgery.<br>Spine | Wrong Outcome |
| #543  | Raynor 2007          | Correlation between low triggered electromyographic thresholds and lumbar pedicle screw malposition: Analysis of 4857 screws                                              | Raynor B.L.; Lenke L.G.; Bridwell K.H.; Taylor B.A.; Padberg A.M.                                                                                                | Spine                             | Wrong Outcome |
| #207  | Shao 2019            | The efficacy of intraoperative multimodal monitoring in pedicle subtraction osteotomies of the lumbar spine                                                               | Shao J.; Lee M.Y.; Louis S.; Knusel K.; Lee B.S.; Pelle D.W.; Savage J.; Tanenbaum J.E.; Mroz T.E.; Steinmetz M.P.                                               | Journal of Neurosurgery:<br>Spine | No 2x2        |



|       |             |                                                                                                                                                                                                                           |                                                                                                 |       |               |
|-------|-------------|---------------------------------------------------------------------------------------------------------------------------------------------------------------------------------------------------------------------------|-------------------------------------------------------------------------------------------------|-------|---------------|
| #2506 | Szalay 1986 | Sensitivity of Spinal Cord Monitoring to Intraoperative Events.                                                                                                                                                           | Szalay, Elizabeth; Carollo, James; Roach, James                                                 |       | No Full Text  |
| #231  | Tamkus 2018 | Transcranial Motor Evoked Potential Alarm Criteria to Predict Foot Drop Injury during Lumbosacral Surgery                                                                                                                 | Tamkus A.; Rice K.S.; Hoffman G.                                                                | Spine | No 2x2        |
| #1023 | Tanaka 2019 | Cutoff Points, Sensitivities, and Specificities of Intraoperative Motor-Evoked Potential Monitoring Determined Using Receiver Operating Characteristic Analysis.                                                          | Tanaka, Satoshi; Akimoto, Jiro; Hashimoto, Ryo; Takanashi, Junko; Oka, Hidehiro                 |       | No 2x2        |
| #25   | Tani 2022   | Threshold-based Monitoring of Compound Muscle Action Potentials for Percutaneous Pedicle Screw Placement in the Lumbosacral Spine: Can We Rely on Stimulation of the Uninsulated Screw to Provide a Valid Safety Warning? | Tani Y.; Saito T.; Taniguchi S.; Ishihara M.; Paku M.; Adachi T.; Ando M.; Kohara N.; Kimura J. | Spine | Wrong Outcome |

|      |                    |                                                                                                                                                    |                                                                                                                |                      |                       |
|------|--------------------|----------------------------------------------------------------------------------------------------------------------------------------------------|----------------------------------------------------------------------------------------------------------------|----------------------|-----------------------|
| #268 | Tobert 2017        | Efficacy of Intraoperative Neurophysiologic Monitoring for Pediatric Cervical Spine Surgery                                                        | Tobert D.G.; Glotzbecker M.P.; Hresko M.T.; Karlin L.I.; Proctor M.R.; Emans J.B.; Miller P.E.; Hedequist D.J. | Spine                | Paediatric population |
| #387 | Ukegawa 2014       | Efficacy of biphasic transcranial electric stimulation in intraoperative motor evoked potential monitoring for cervical compression myelopathy     | Ukegawa D.; Kawabata S.; Sakaki K.; Ishii S.; Tomizawa S.; Inose H.; Yoshii T.; Kato T.; Enomoto M.; Okawa A.  | Spine                | Wrong Outcome         |
| #645 | Wilson-Holden 1999 | Efficacy of intraoperative monitoring for pediatric patients with spinal cord pathology undergoing spinal deformity surgery                        | Wilson-Holden T.J.; Padberg A.M.; Lenke L.G.; Larson B.J.; Bridwell K.H.; Bassett G.S.                         | Spine                | No 2x2                |
| #678 | Yang 1994          | Intraoperative transcranial electrical motor evoked potential monitoring during spinal surgery under intravenous ketamine or etomidate anaesthesia | Yang L.-H.; Lin S.-M.; Lee W.-Y.; Liu C.-C.                                                                    | Acta Neurochirurgica | Wrong Outcome         |

|      |              |                                                                                                                                                 |                                                                                                                                                                                                   |                 |                    |
|------|--------------|-------------------------------------------------------------------------------------------------------------------------------------------------|---------------------------------------------------------------------------------------------------------------------------------------------------------------------------------------------------|-----------------|--------------------|
| #187 | Yoshida 2019 | Adverse Events Related to Transcranial Electric Stimulation for Motor-evoked Potential Monitoring in High-risk Spinal Surgery                   | Yoshida G.; Imagama S.; Kawabata S.; Yamada K.; Kanchiku T.; Fujiwara Y.; Tadokoro N.; Takahashi M.; Wada K.; Yamamoto N.; Ushirozako H.; Kobayashi K.; Yasuda A.; Ando M.; Tani T.; Matsuyama Y. | Spine           | Wrong Outcome      |
| #313 | Raynor 2016  | Failure of Intraoperative Monitoring to Detect Postoperative Neurologic Deficits: A 25-year Experience in 12,375 Spinal Surgeries               | Raynor B.L.; Padberg A.M.; Lenke L.G.; Bridwell K.H.; Riew K.D.; Buchowski J.M.; Luhmann S.J.                                                                                                     | Spine           | No 2x2             |
| #345 | Murcow 2013  | Spinal Cord Monitoring With Transcranial Motor Evoked Potentials in Patients With Neural Axis Abnormalities Undergoing Spinal Deformity Surgery | Ryan D. Muchow, MDa,* , Anna McClung, BSN, RNb, Patricia Rampy, MS, R EP T, CNIMb, Elizabeth Van Allen, MS, R EP T, CNIMb, Steven Sparagana, MDb, Daniel J. Sucato, MD, MS                        | Spine Deformity | No/ Incomplete 2x2 |

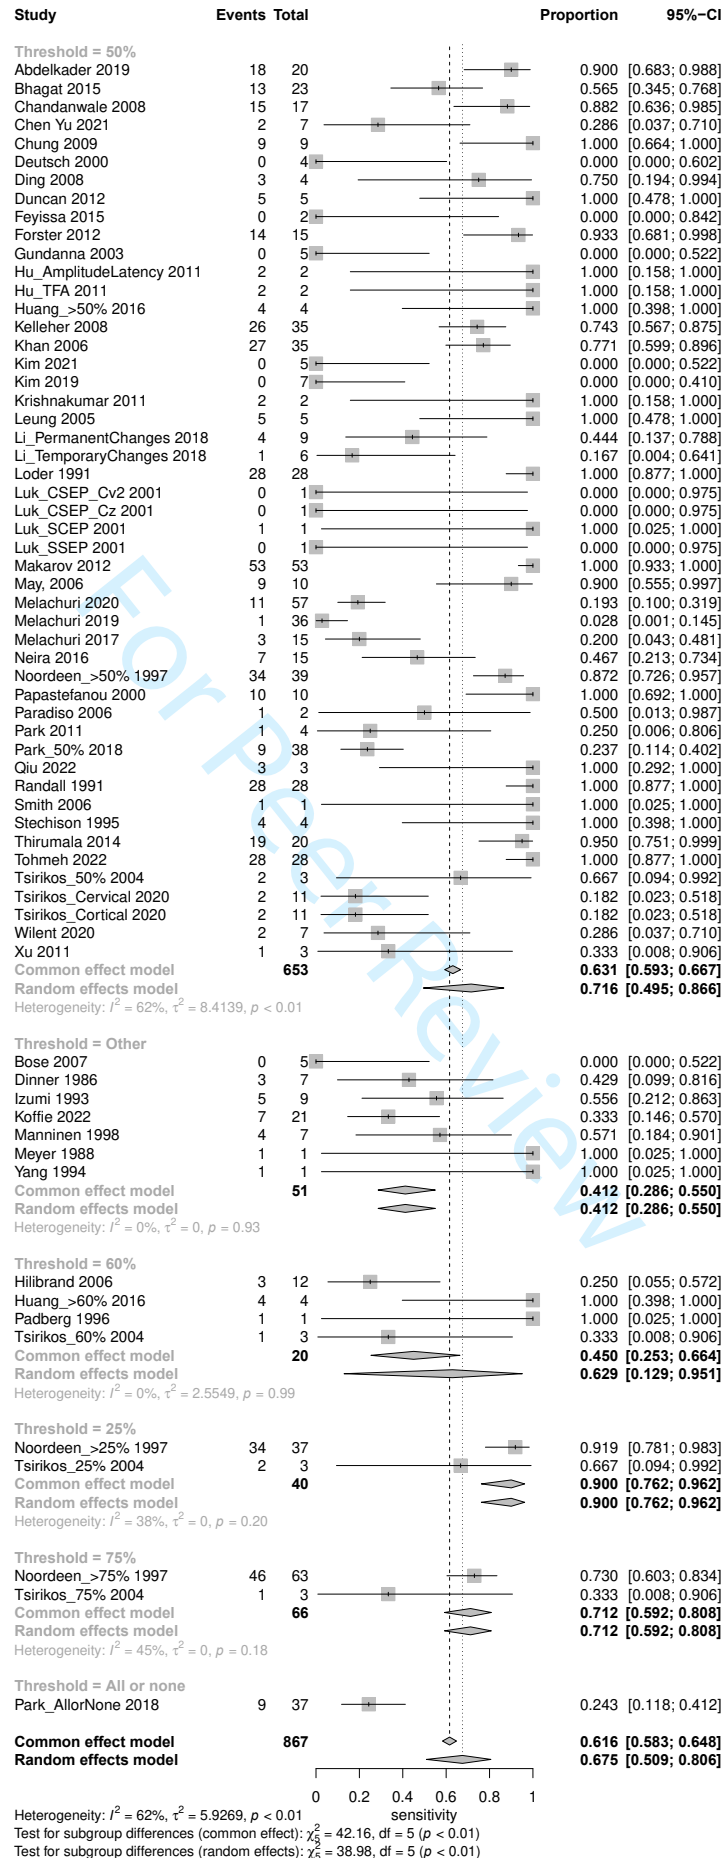

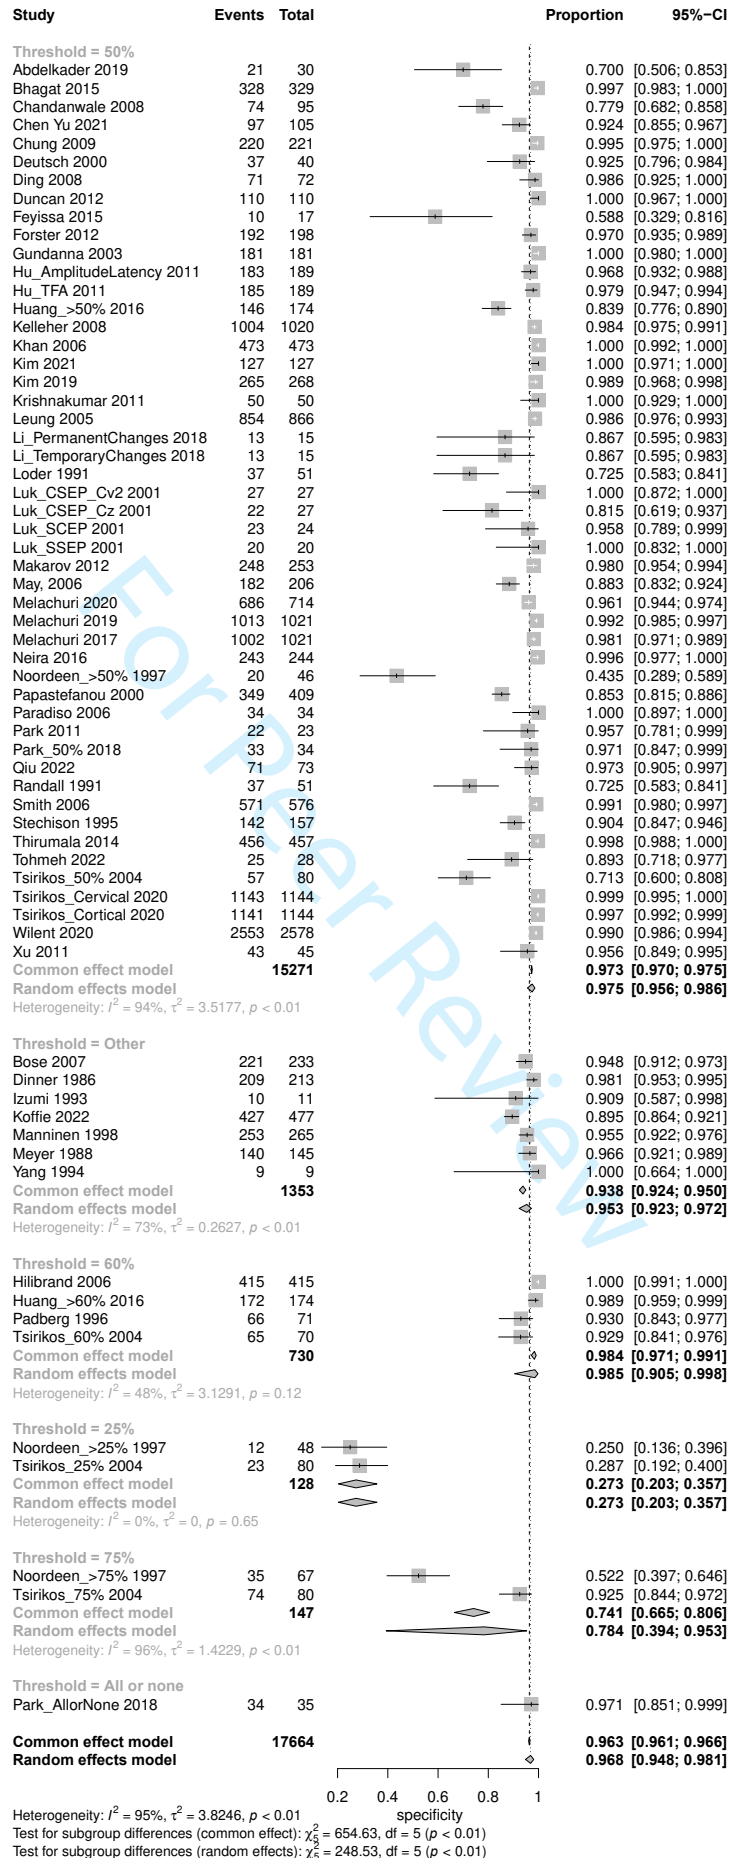

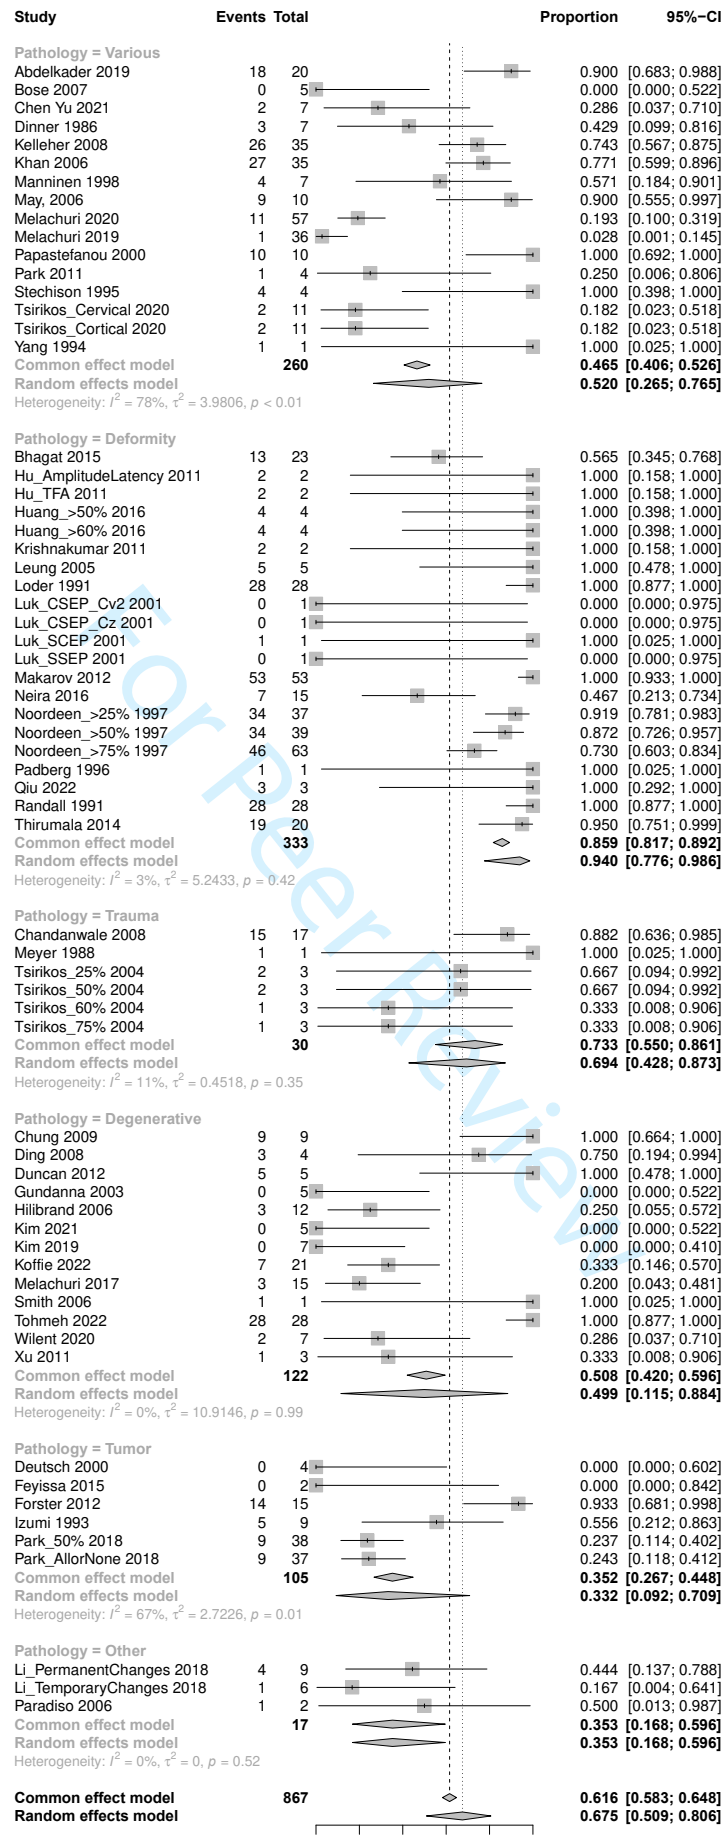

Heterogeneity:  $I^2 = 62\%$ ,  $\tau^2 = 5.9269$ ,  $p < 0.01$   
 Test for subgroup differences (common effect):  $\chi^2_5 = 132.04$ ,  $df = 5$  ( $p < 0.01$ )  
 Test for subgroup differences (random effect):  $\chi^2_5 = 15.99$ ,  $df = 5$  ( $p < 0.01$ )

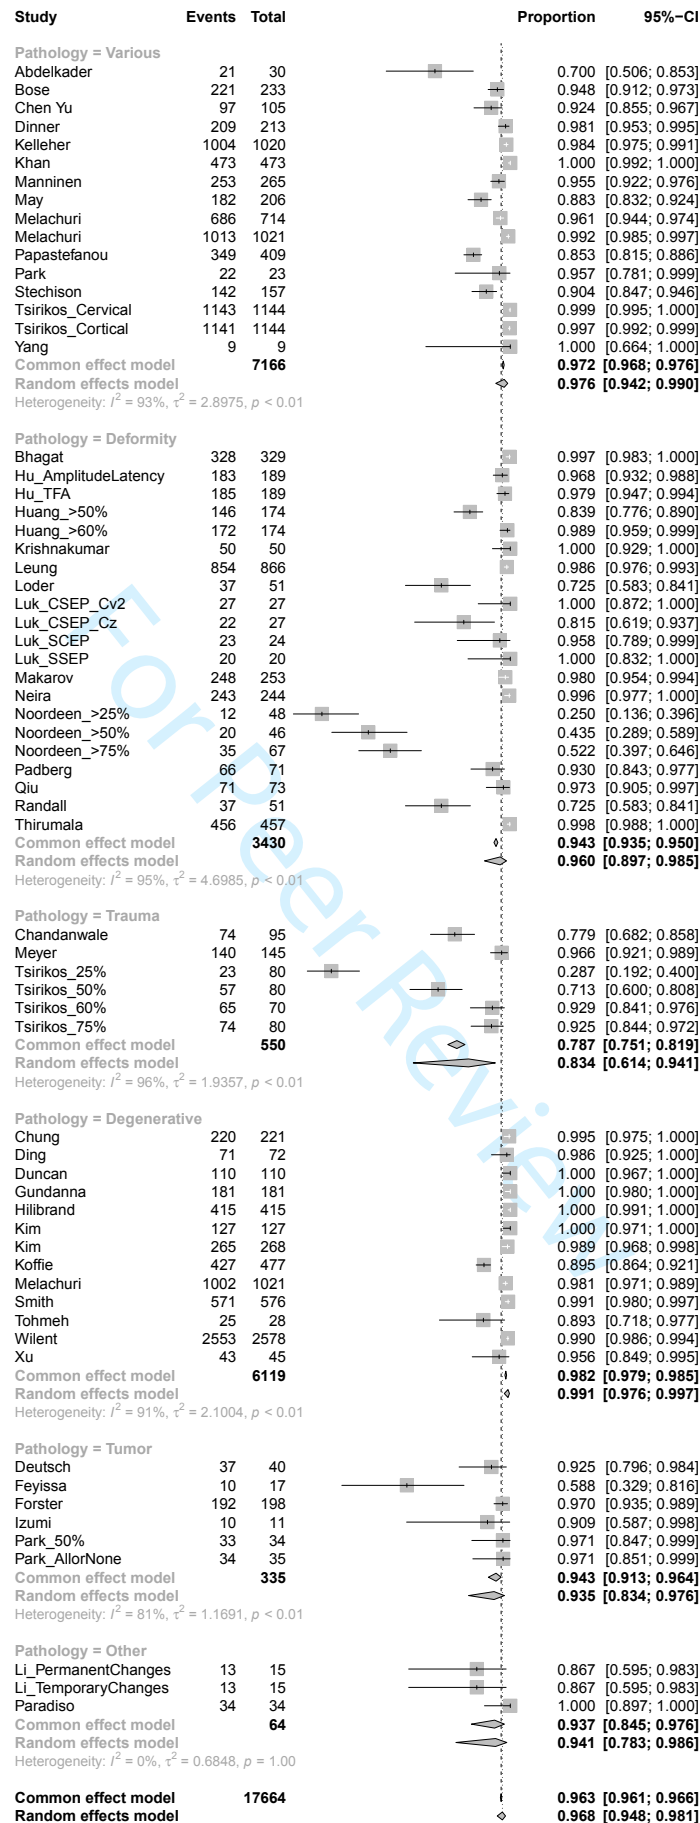

Heterogeneity:  $I^2 = 95\%$ ,  $\tau^2 = 3.8246$ ,  $p < 0.01$   
 Test for subgroup differences (common effect):  $\chi^2_5 = 437.87$ ,  $df = 5$  ( $p < 0.01$ )  
 Test for subgroup differences (random effects):  $\chi^2_5 = 18.56$ ,  $df = 5$  ( $p < 0.01$ )

### Comparison of sROC for SSEP for Different Regions

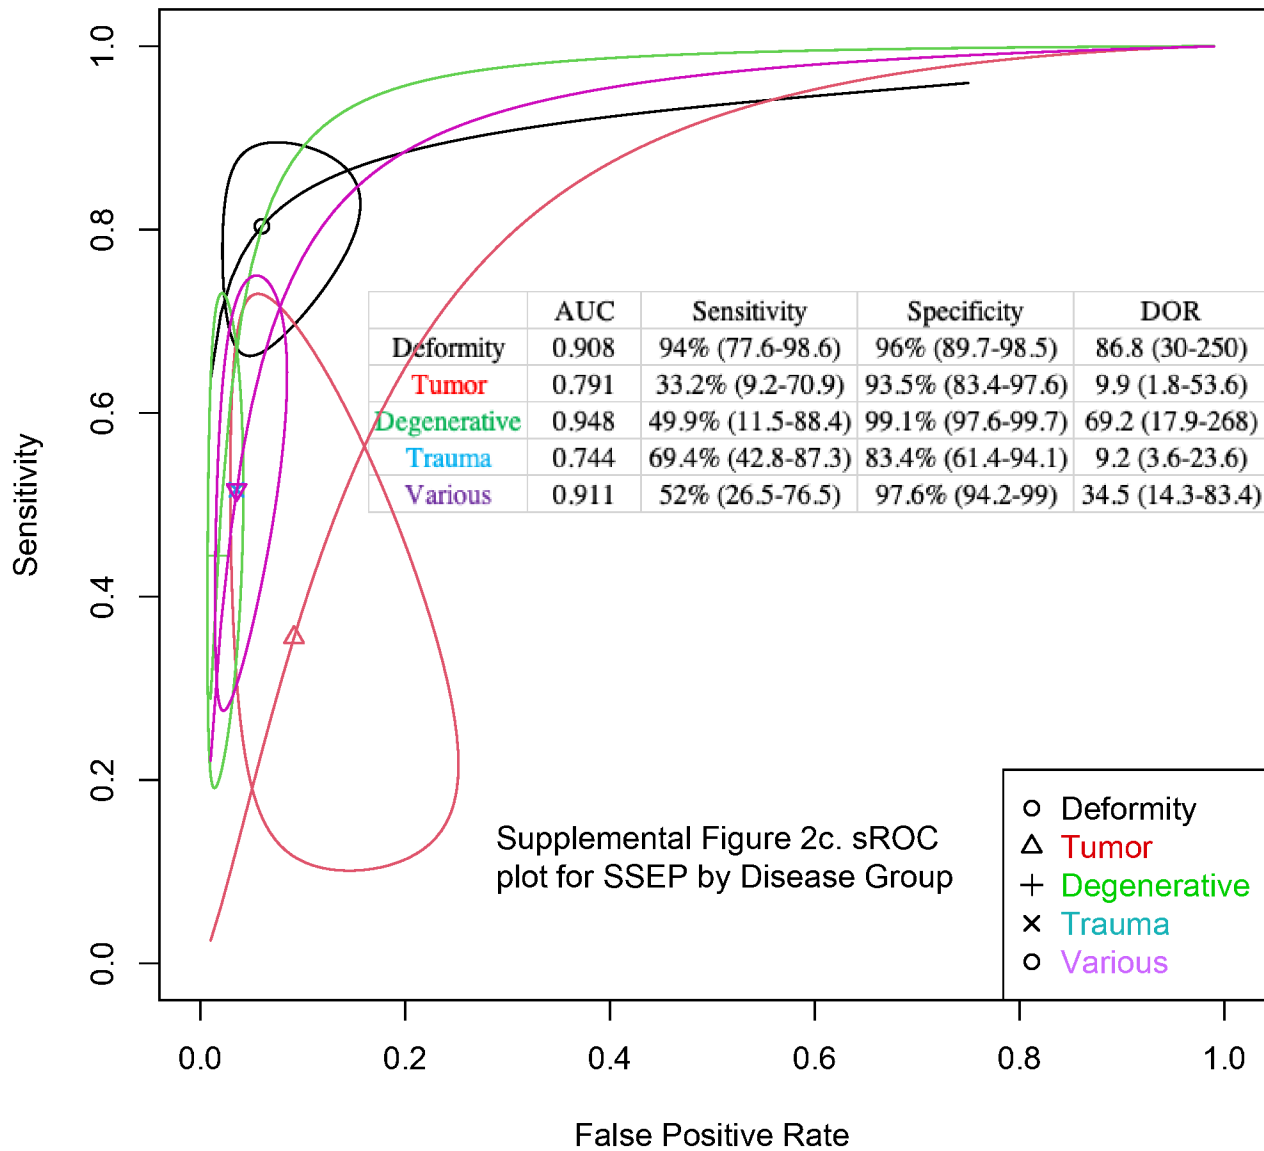



Supplemental Figure 3a. Forest plot for Sensitivity for SSEP by Region of Surgery

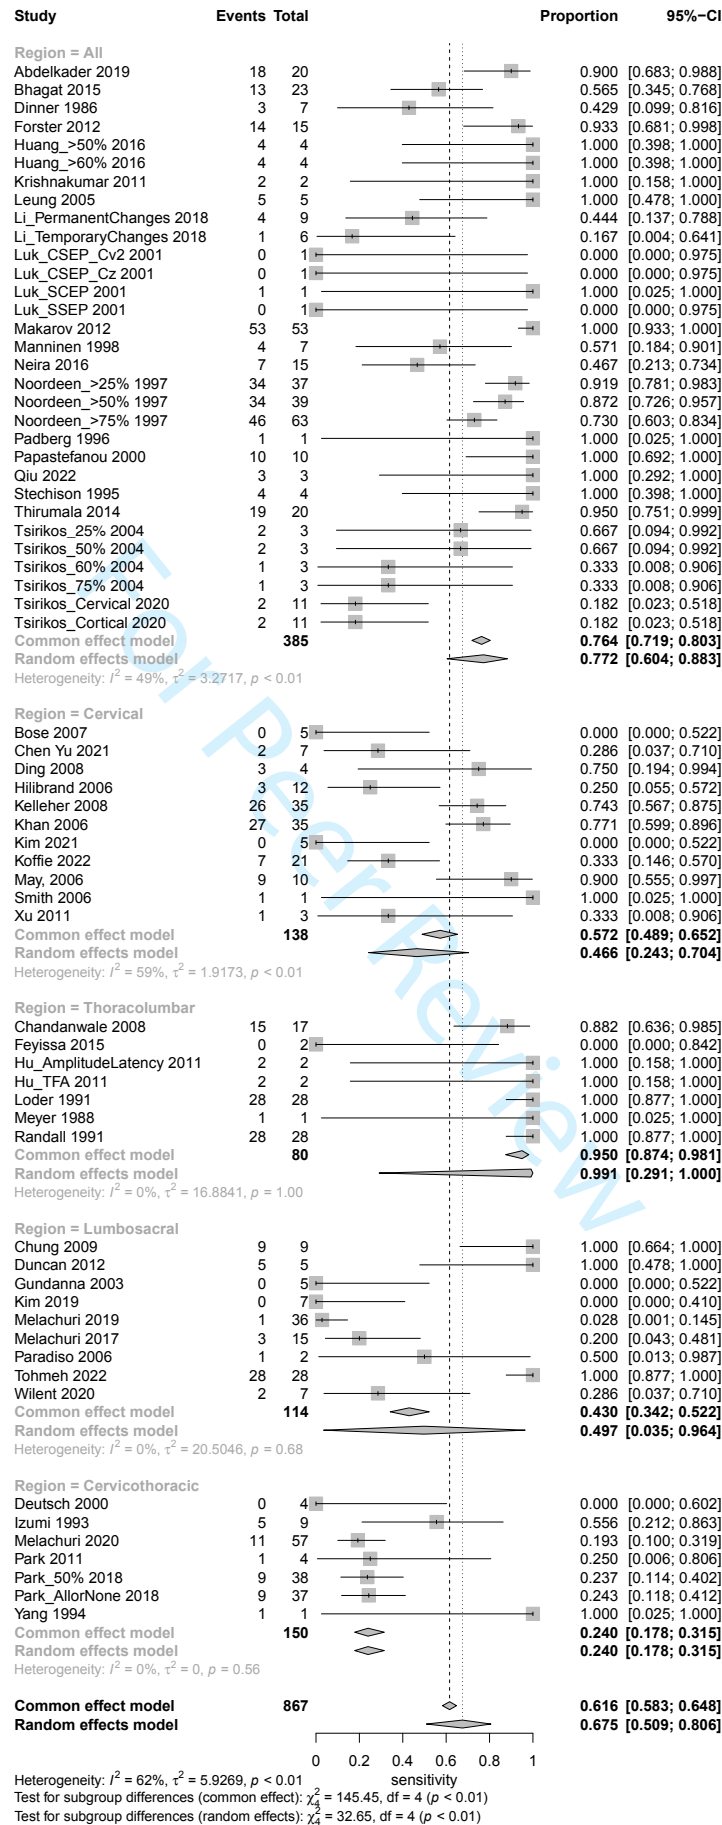

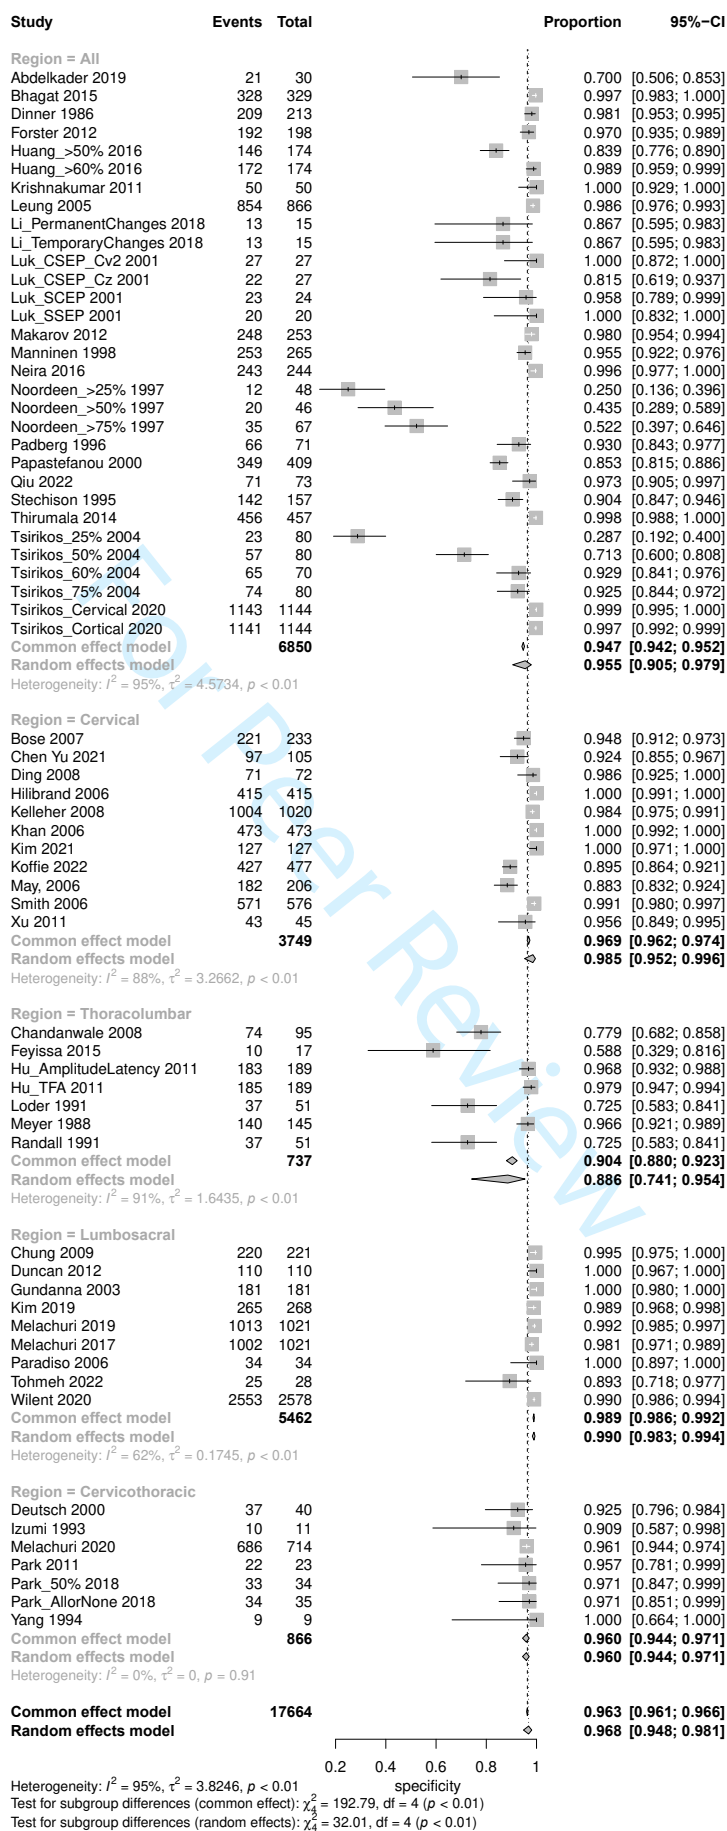

### Comparison of sROC for SSEP for Different Regions

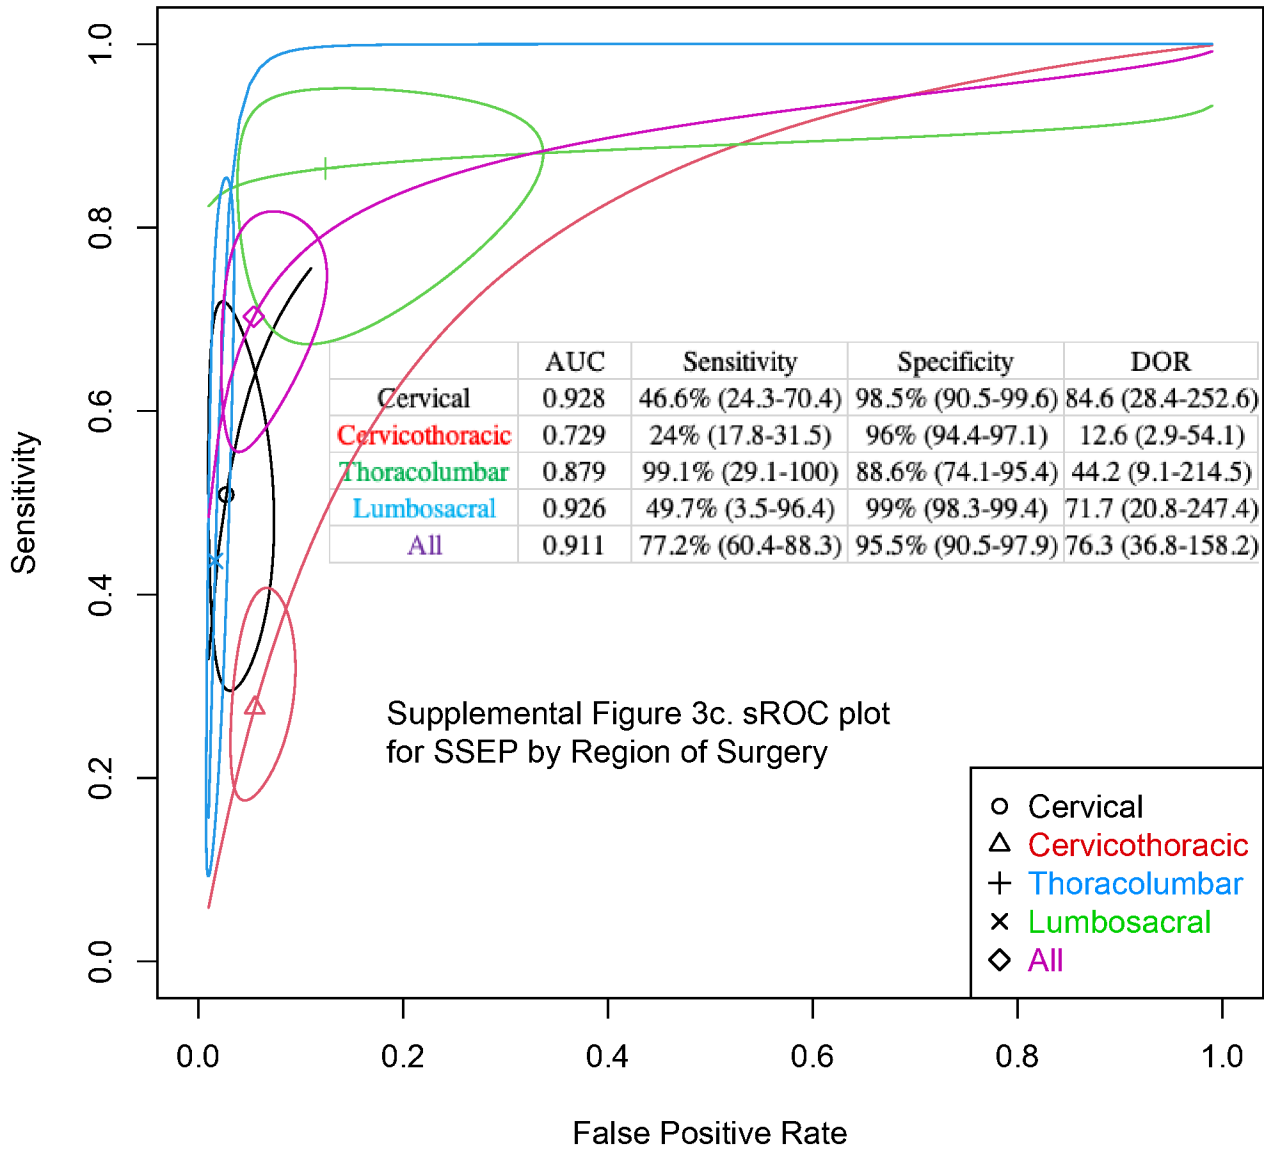

Supplemental Figure 4a. Forest plot for Sensitivity for MEP by Threshold Type

Global Spine Journal

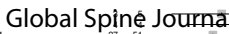

0.600 [0.200; 0.900]  
0.529 [0.394; 0.661]  
0.636 [0.339; 0.857]  
0.200 [0.11; 0.847]  
1.000 [0.063; 0.984]  
0.568 [0.463; 0.675]  
0.568 [0.463; 0.675]

Threshold = All or None  
Avila 2013  
Libati 1999  
Muramoto, Presence\_Absence 2014  
Park, AllorNone 2018  
Sakaki\_SpinalSegment5 2012  
Sakaki\_SpinalTract6 2012  
Common effect model  
Random effects model  
Heterogeneity:  $I^2 = 0\%$ ,  $\tau^2 = 0$ ,  $p = 0.92$

Threshold = 10% Decrease  
Sakaki\_SpinalSegment5 2012  
Sakaki\_SpinalTract5 2012  
Common effect model  
Random effects model  
Heterogeneity:  $I^2 = 0\%$ ,  $\tau^2 = 0$ ,  $p = 1.00$

Threshold = 20% Decrease  
Sakaki\_SpinalSegment4 2012  
Sakaki\_SpinalTract4 2012  
Common effect model  
Random effects model  
Heterogeneity:  $I^2 = 0\%$ ,  $\tau^2 = 0$ ,  $p = 1.00$

Threshold = 30% Decrease  
Sakaki\_SpinalSegment2 2012  
Sakaki\_SpinalTract3 2012  
Common effect model  
Random effects model  
Heterogeneity:  $I^2 = 0\%$ ,  $\tau^2 = 0$ ,  $p = 1.00$

Threshold = 40% Decrease  
Sakaki\_SpinalSegment2 2012  
Sakaki\_SpinalTract2 2012  
Common effect model  
Random effects model  
Heterogeneity:  $I^2 = 0\%$ ,  $\tau^2 = 0$ ,  $p = 1.00$

Threshold = 50% Decrease  
Boase 2007  
Clark 2016  
Clark, Persistent 2013  
Clark, Temporary 2013  
Comtes 2017  
Forster 2012  
Fujiwara 2016  
Hsu 2008  
Hyun 2009  
Ito, Graded 2012  
Jarvis 2013  
Kelleher 2008  
Li, >50% Amp, Permanent 2018  
Li, >50% Amp, Temporary 2018  
Luk 2001  
Megha Br, D-Wave, Immediate Postoperative 2021  
Megha Br, D-Wave, Long Term 2021  
Megha Br, TcMEP, Immediate Postoperative 2021  
Megha Br, TcMEP, Long Term 2021  
Oya 2017  
Park 2011  
Park, 50% 2018  
Quinones, 2005  
Sakaki\_SpinalSegment1 2012  
Sakaki\_SpinalTract1 2012  
Velayutham 2016  
Wilent 2020  
Yang 1994  
Zuccaro 2017  
Common effect model  
Random effects model  
Heterogeneity:  $I^2 = 50\%$ ,  $\tau^2 = 1.4752$ ,  $p < 0.01$

Threshold = 50%-65%  
Wilent 2019

Threshold = 60%-80%  
Kim 2019

Threshold = 60% Decrease  
Hilibrand 2004

Threshold = 65% Decrease  
Bhalodia 2013  
Krishnakumar 2011  
Kundman 2010  
Neira 2016  
Traba, >65% Amp 2013  
Common effect model  
Random effects model  
Heterogeneity:  $I^2 = 0\%$ ,  $\tau^2 = 0$ ,  $p = 0.99$

Threshold = 70% Decrease  
Funaba 2022  
Funaba 2022  
Funaba 2021  
Kobayashi 2021  
Kobayashi 2019  
Kobayashi 2021  
Kobayashi 2022  
Kobayashi 2014  
Kobayashi, 2018, >70% Amp 2018  
Kobayashi, 2018, >70% Amp&10% Latency 2018  
Kobayashi, 2018, >70% Amp&15% Latency 2018  
Kobayashi, 2018, Thoracic, >70% Amp 2018  
Kobayashi, 2018, Thoracic, >70% Amp&10% Latency 2018  
Kobayashi, 2018, Thoracic, >70% Amp&15% Latency 2018  
Muramoto 2013  
Muramoto, 70% 2014  
Takahashi 2021  
Traba, >70% Amp 2013  
Ushirozaka 2018  
Ushirozaka 2019  
Ushirozaka 2020  
Ushirozaka, EMSCT 2021  
Ushirozaka, JMSCT 2021  
Yoshida 2022  
Yoshida 2018  
Common effect model  
Random effects model  
Heterogeneity:  $I^2 = 30\%$ ,  $\tau^2 = 1.1608$ ,  $p = 0.03$

Threshold = 75% Decrease  
Choi 2014  
Feng 2012  
Traba, >75% Amp 2013  
Common effect model  
Random effects model  
Heterogeneity:  $I^2 = 0\%$ ,  $\tau^2 = 0$ ,  $p = 0.43$

Threshold = 80% Decrease  
Bhagat 2015  
Chen, Yu, 2021  
Kim 2021  
Kim 2007  
Kurukawa 2017  
Langoo Criteria 1 2003  
Langoo Criteria 2 2003  
Langoo Criteria 3 2003  
Li, >80% Amp, Permanent 2018  
Li, >80% Amp, Temporary 2018  
Fadberg 1996  
Olu 2022  
Tanaka, 1, With, CMAP, Normalization 2015  
Tanaka, 2, Without, CMAP, Normalization 2015  
Traba, >80% Amp 2013  
Tsai 2020  
Wang 2016  
Wang 2015  
Wang, 2 2016  
Zhuang 2014  
Common effect model  
Random effects model  
Heterogeneity:  $I^2 = 0\%$ ,  $\tau^2 = 2.5962$ ,  $p = 0.65$

Threshold = Latency >10%  
Kobayashi, 2018, >10% Latency 2018  
Kobayashi, 2018, Thoracic, >10% Latency 2018  
Common effect model  
Random effects model  
Heterogeneity:  $I^2 = 0\%$ ,  $\tau^2 = 0$ ,  $p = 1.00$

Threshold = Latency >15%  
Kobayashi, 2018, >15% Latency 2018  
Kobayashi, 2018, Thoracic, >15% Latency 2018  
Common effect model  
Random effects model  
Heterogeneity:  $I^2 = 0\%$ ,  $\tau^2 = < 0.0001$ ,  $p = 1.00$

Threshold = Other  
Calancie 1998  
Calancie 2008  
Ro, 16 channel 2013  
Ro, 4 channel 2013  
Ro, 8 channel 2013  
Ro, CMAP 2012  
Ro, CMAP 2012  
Kim, AH 2012  
Kim, TA 2012  
Koffe 2022  
Miller 2019  
Sutter, cmEP 2019  
Sutter, smEP 2019  
Traba, >70% Area 2013  
Common effect model  
Random effects model  
Heterogeneity:  $I^2 = 46\%$ ,  $\tau^2 = 5.8583$ ,  $p = 0.03$

Threshold = Spinal Cord Changes  
Xu 2021

Common effect model  
Random effects model

Heterogeneity:  $I^2 = 32\%$ ,  $\tau^2 = 1.9159$ ,  $p < 0.01$   
Test for subgroup differences (common effect):  $\chi^2 = 56.86$ ,  $df = 16$  ( $p < 0.01$ )  
Test for subgroup differences (random effects):  $\chi^2 = 54.03$ ,  $df = 16$  ( $p < 0.01$ )

0.842 [0.825; 0.858]  
0.900 [0.861; 0.928]

sensitivity

https://mc.manuscriptcentral.com/gsjournal

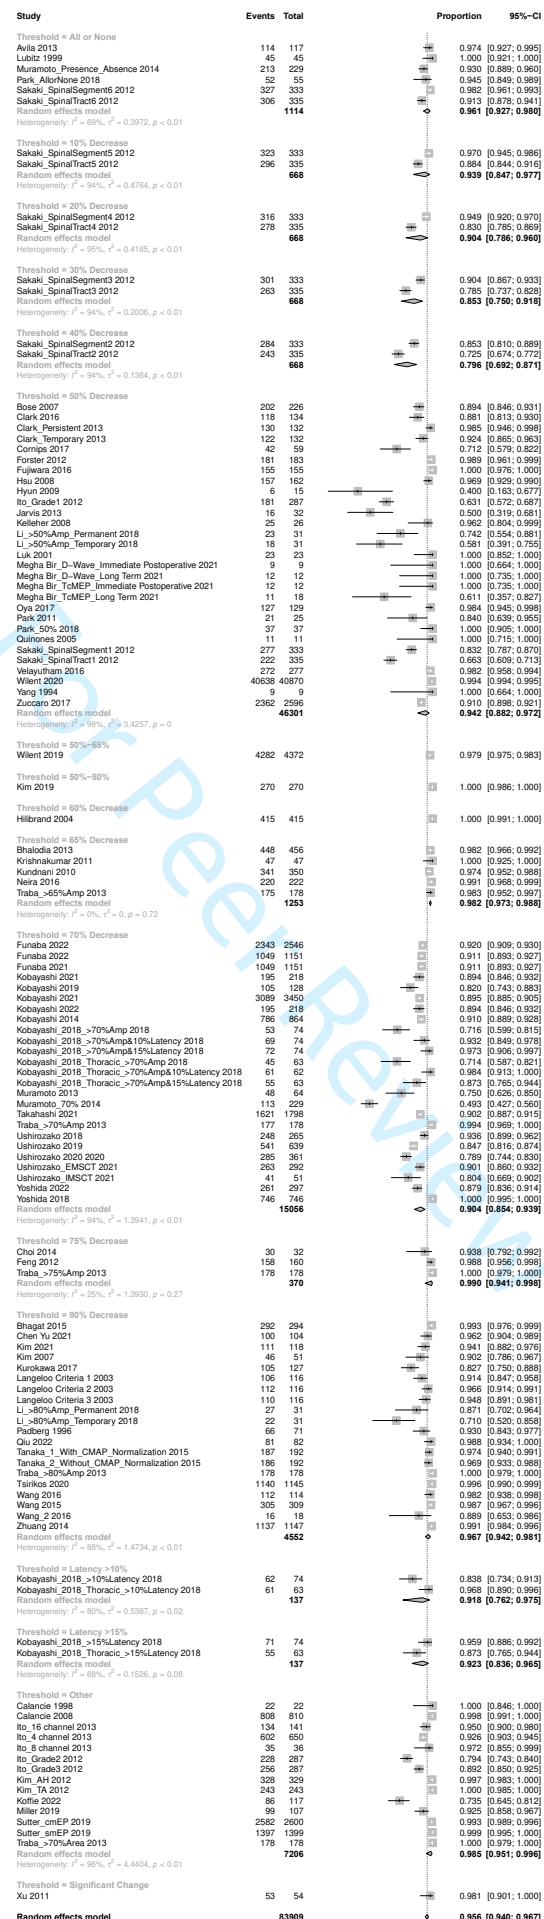

Supplemental Figure 5a. Forest plot for Sensitivity for MEP by Disease Group

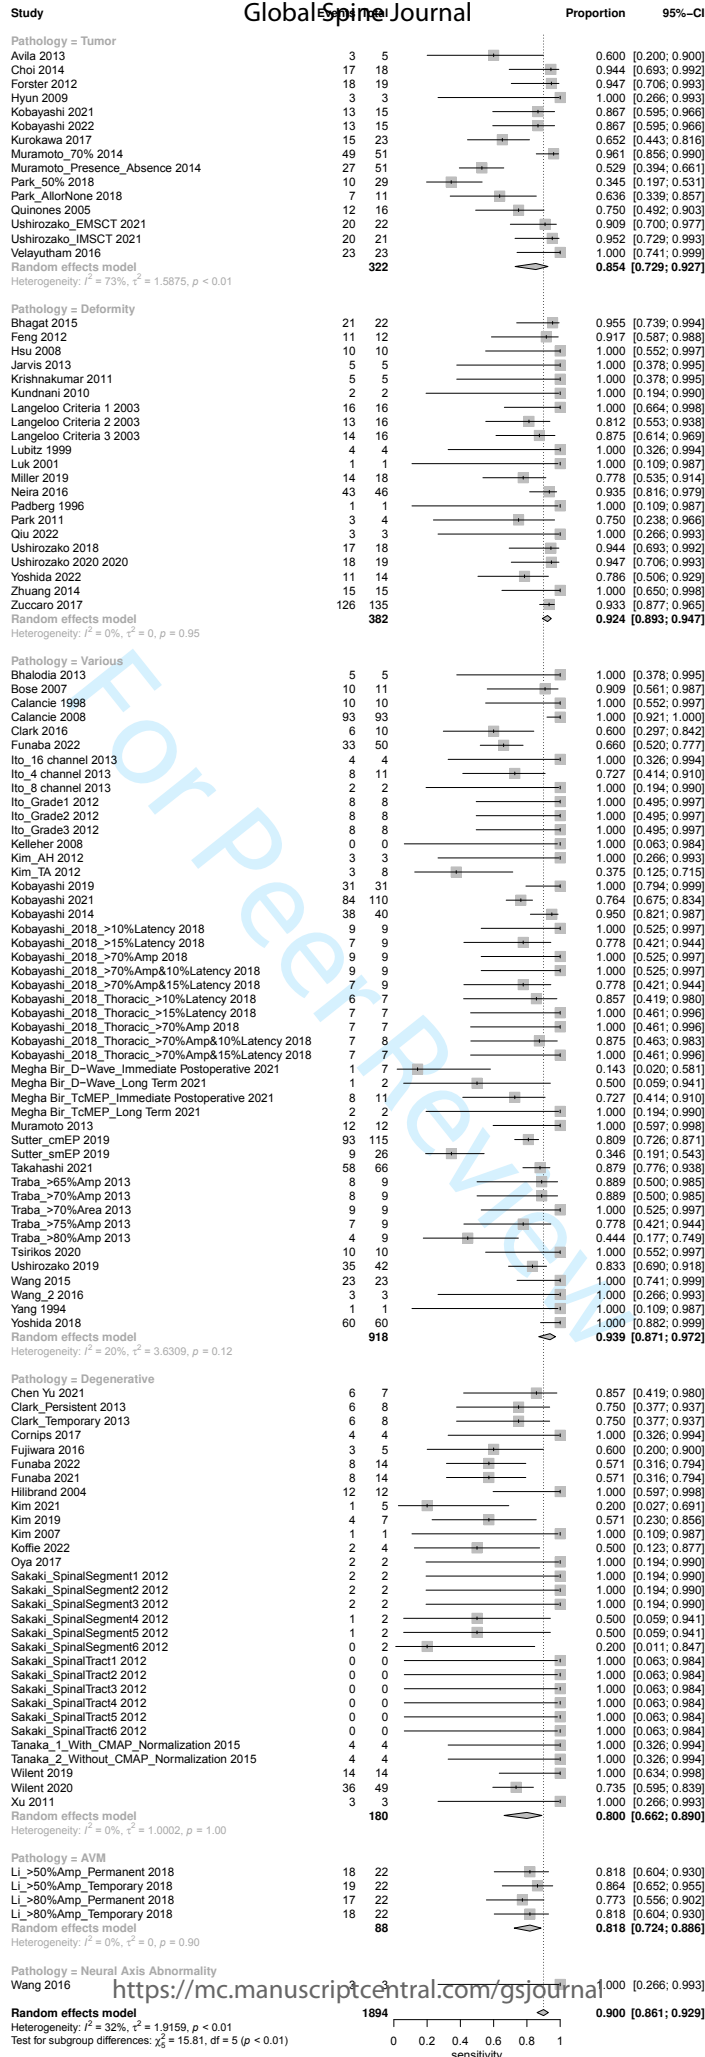

Supplemental Figure S5. Forest plot for MEP by Disease Group

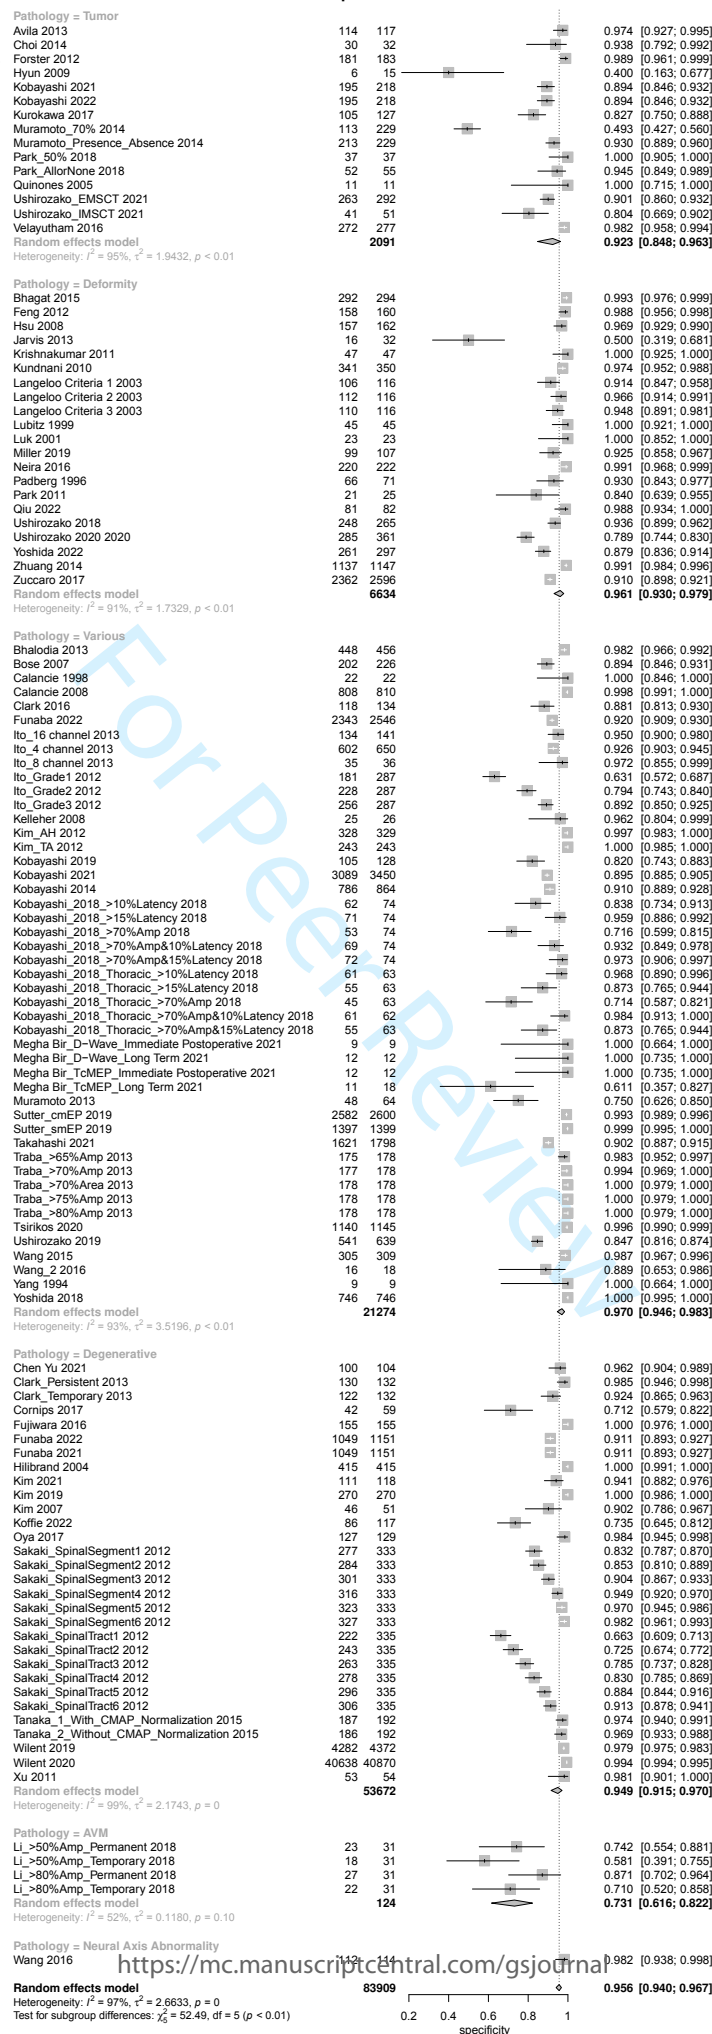

### Comparison of sROC for MEP by Different Pathology

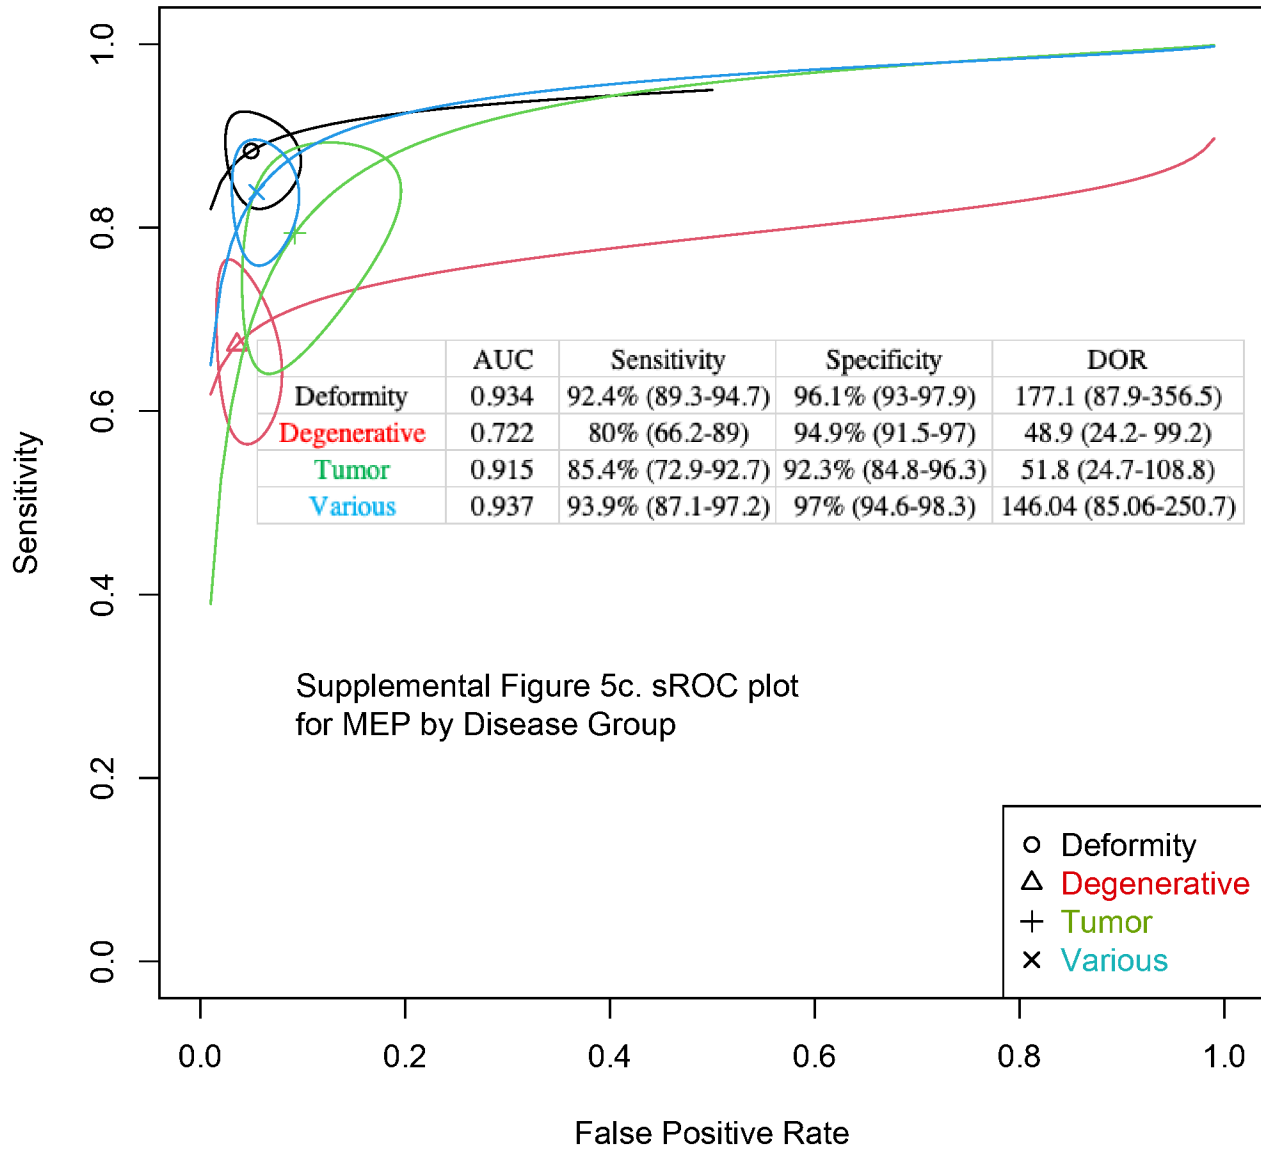



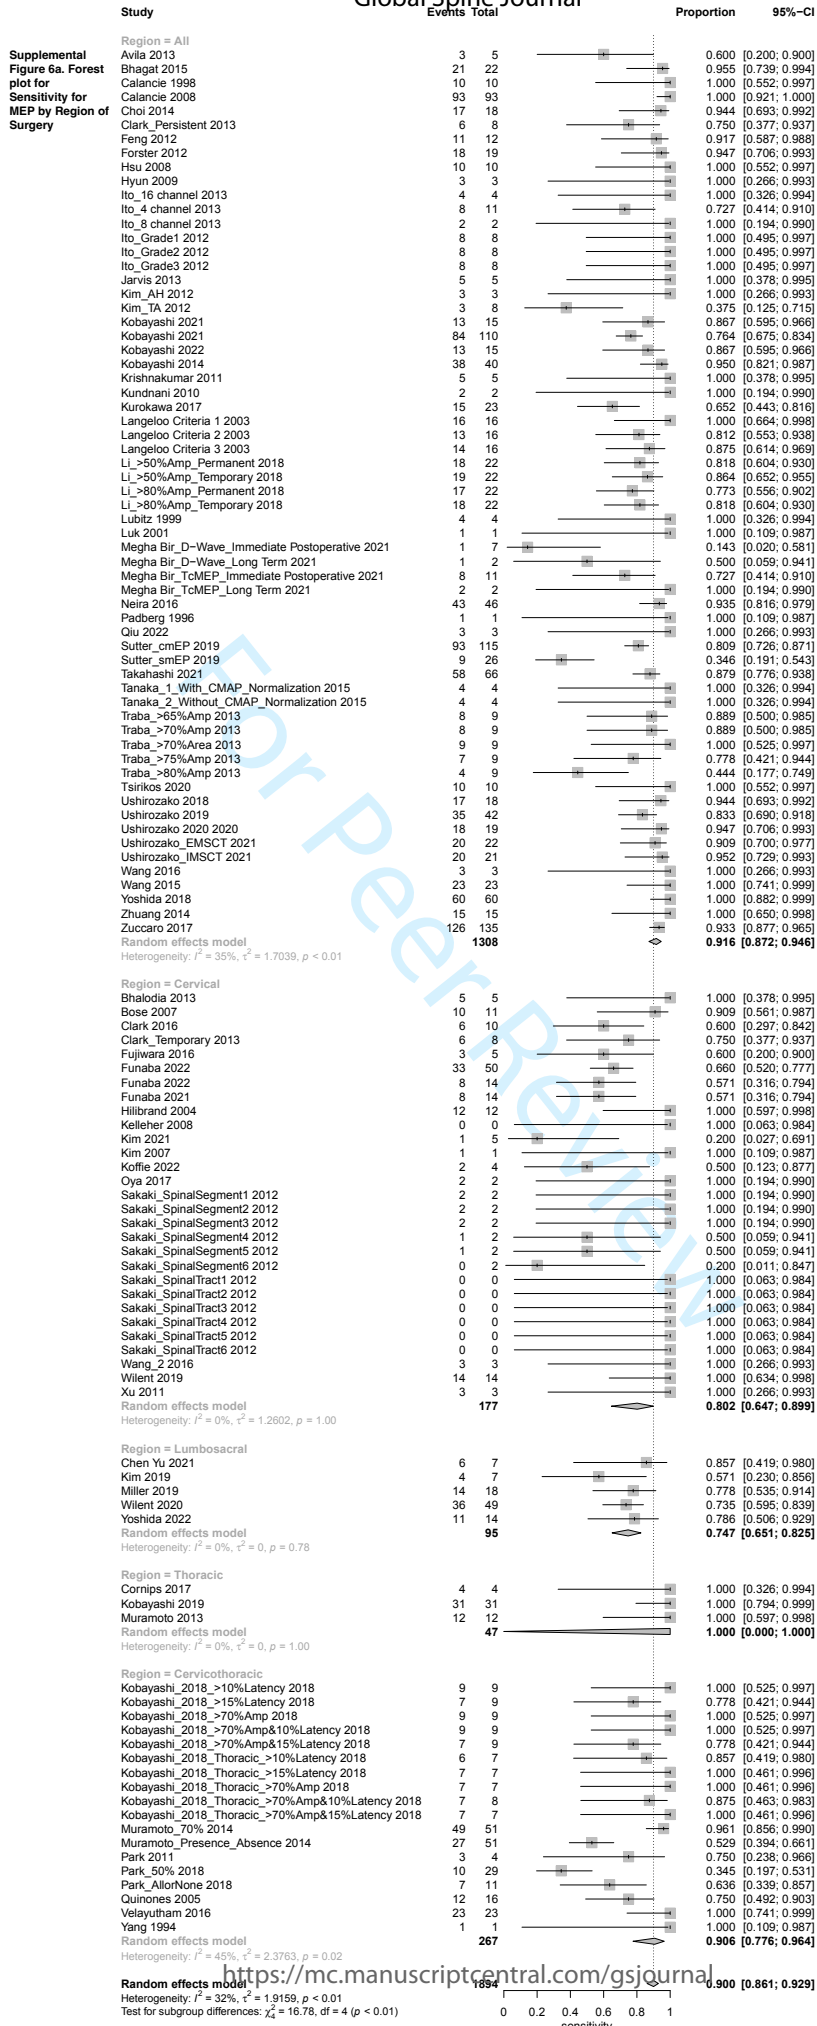

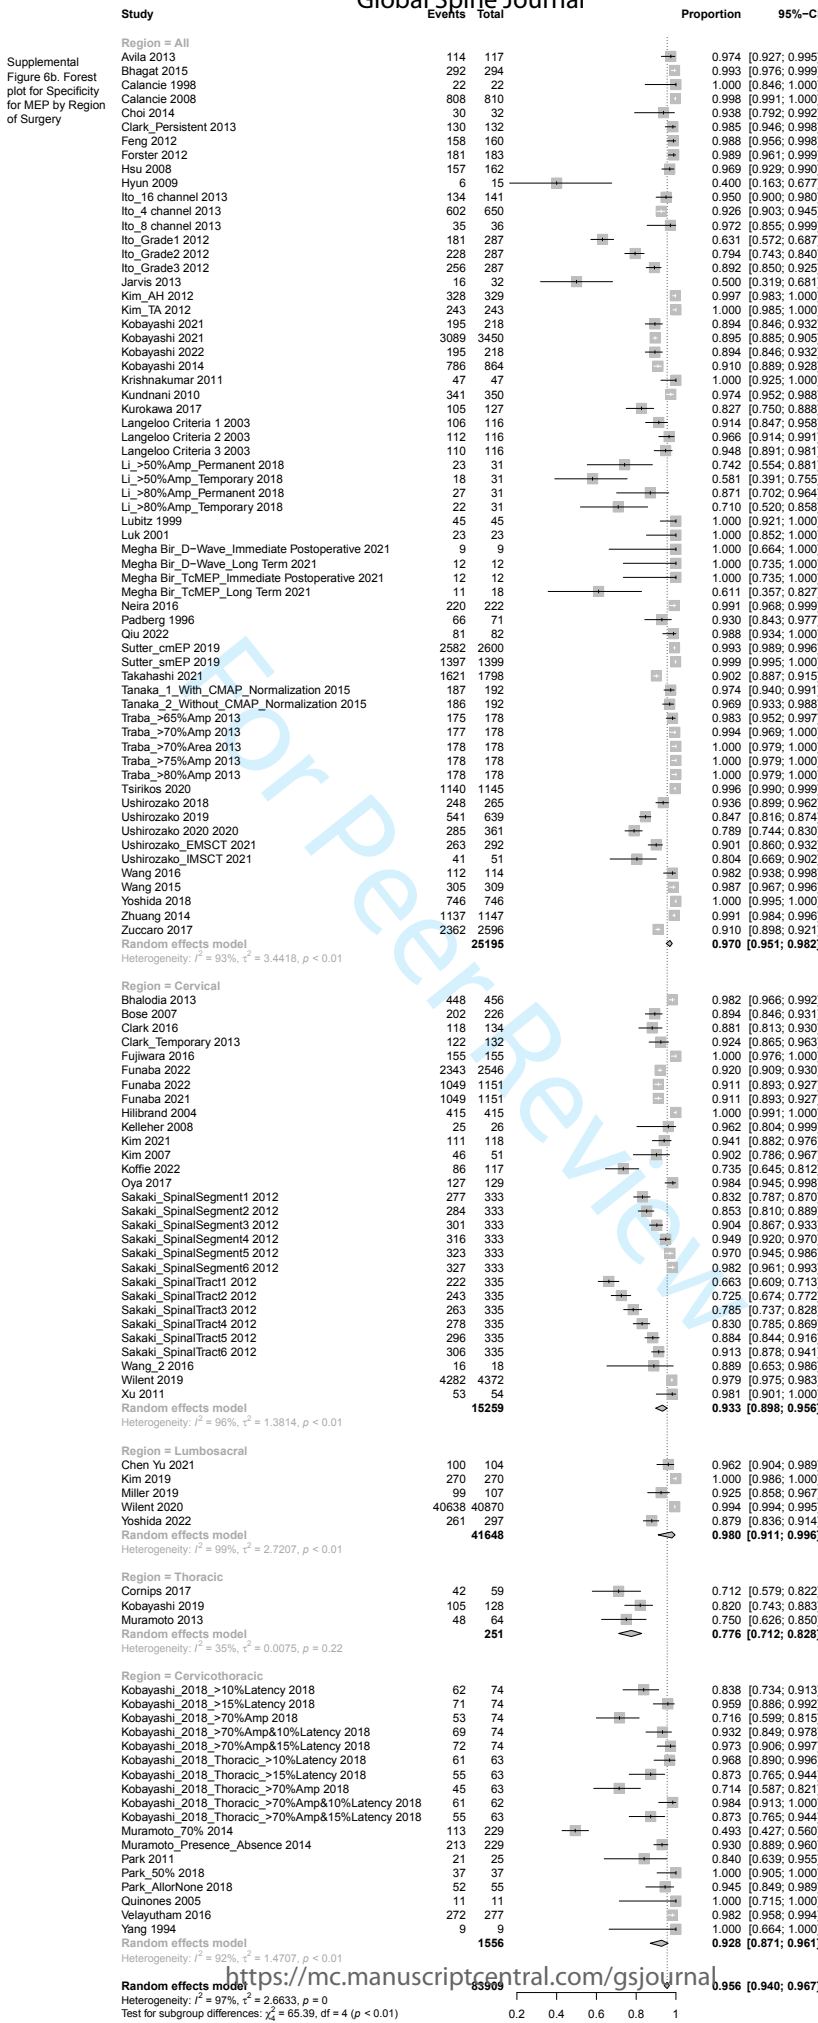

Supplemental Figure 6b. Forest plot for Specificity for MEP by Region of Surgery

### Comparison of sROC for MEP by Different Region

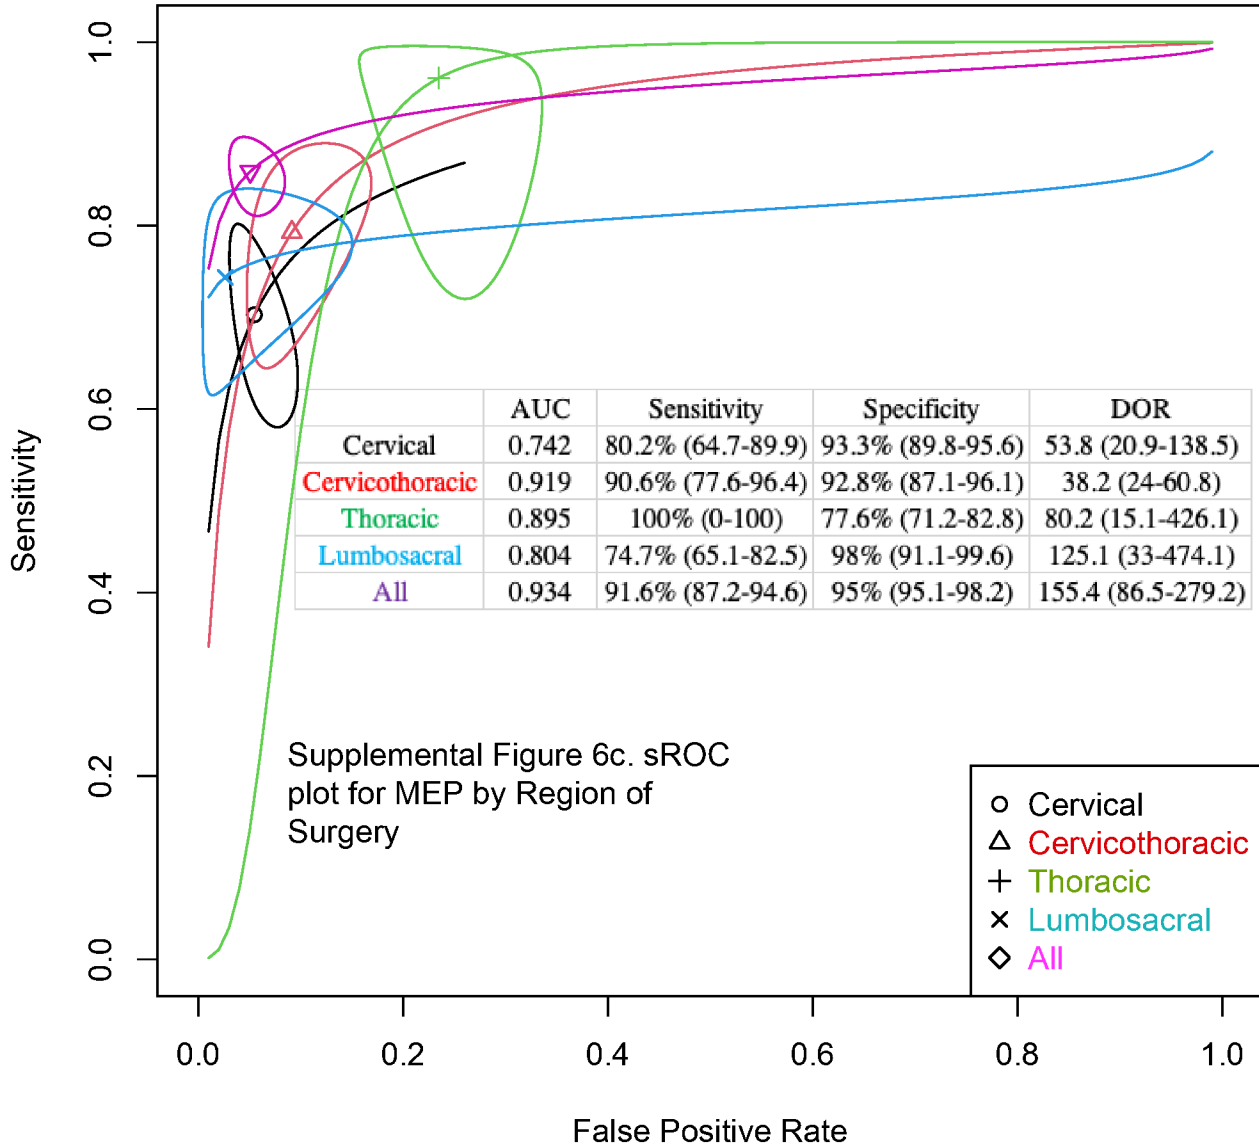

**Supplemental Figure 7a. Forest plot for Sensitivity for EMG by EMG Type**

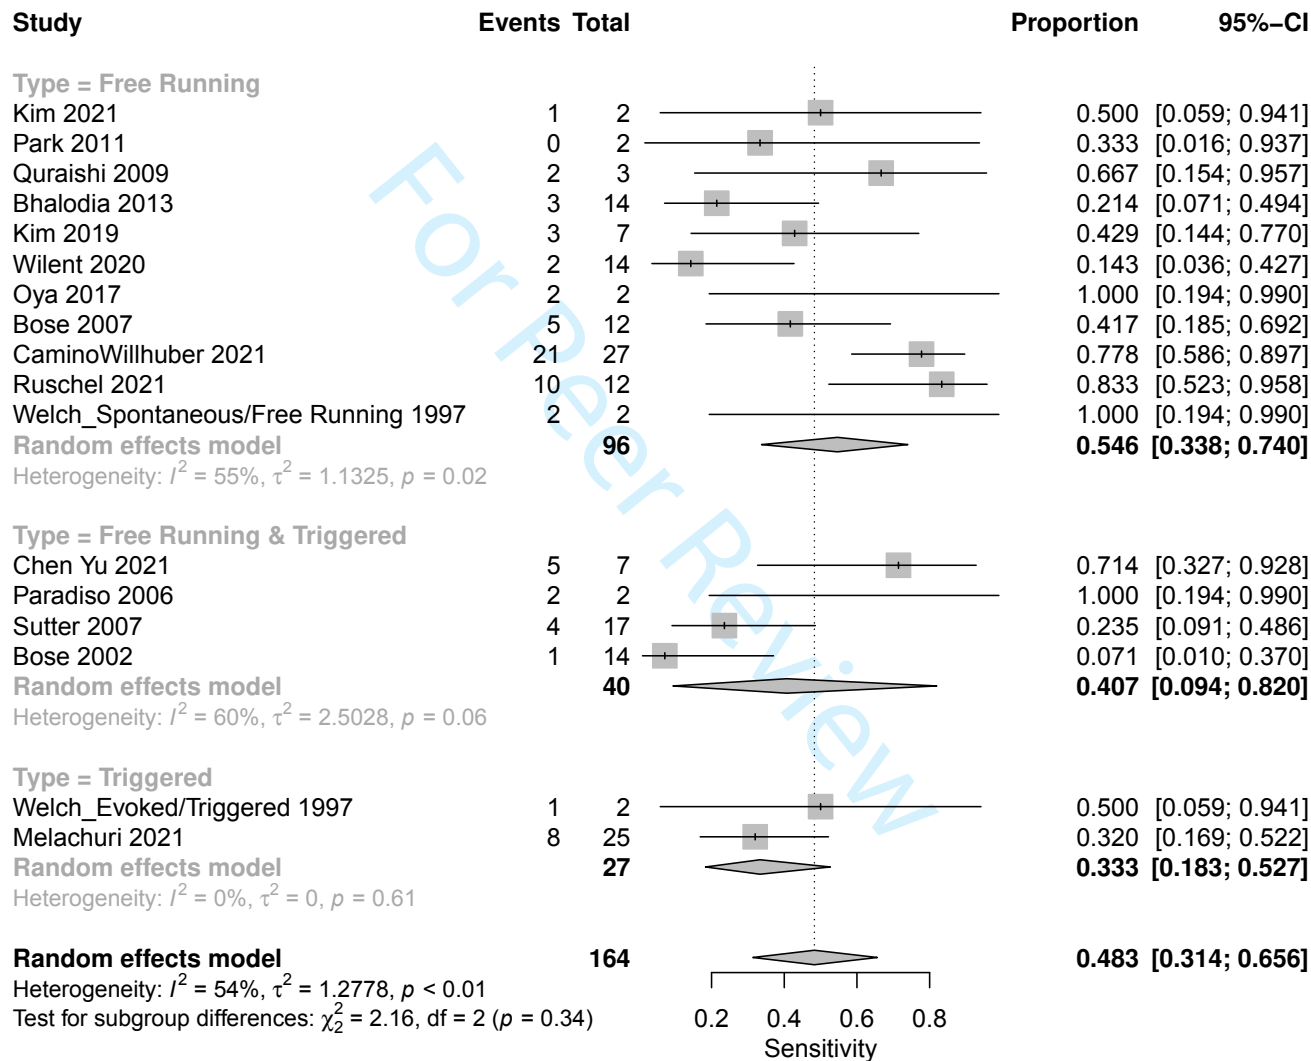

**Supplemental Figure 7b. Forest plot for Specificity for EMG by EMG Type**

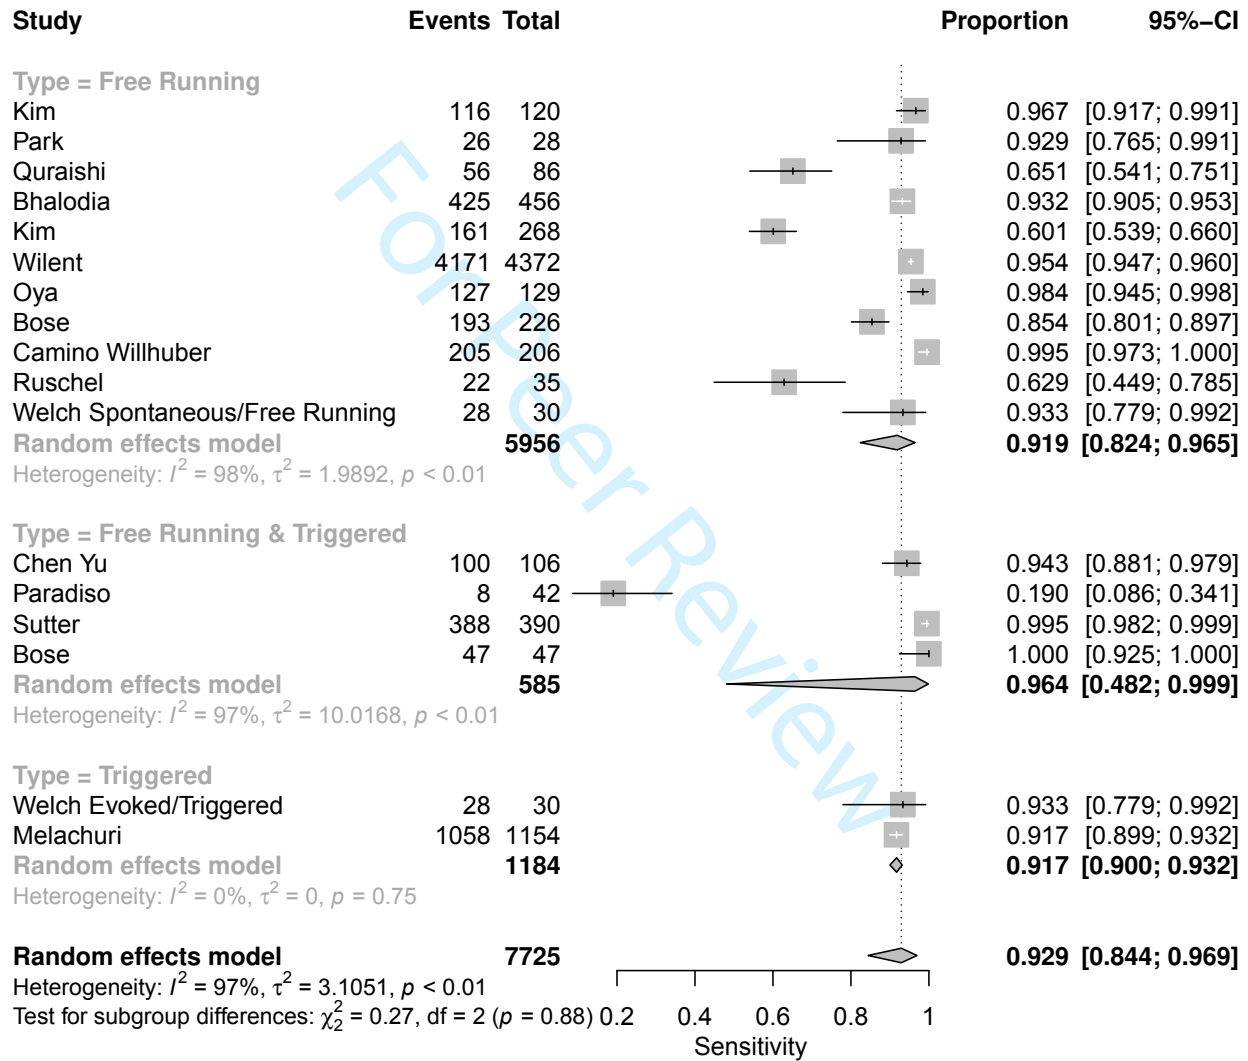

### Comparison of sROC for EMG by Different Type

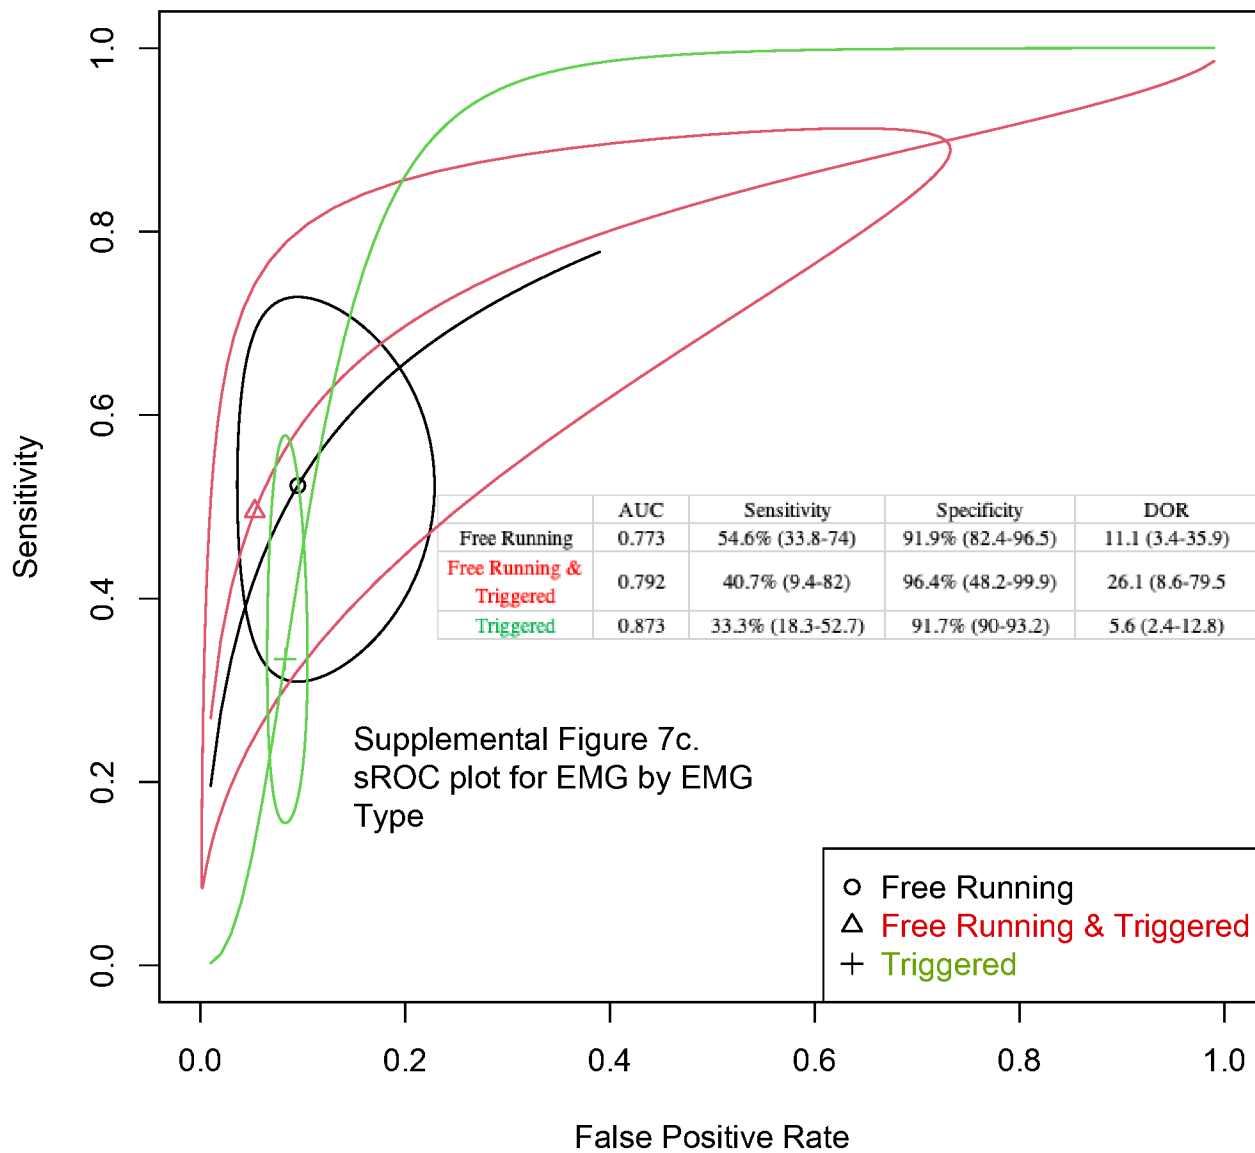

Supplemental Figure 8a. Forest plot for Sensitivity for EMG by Disease Group

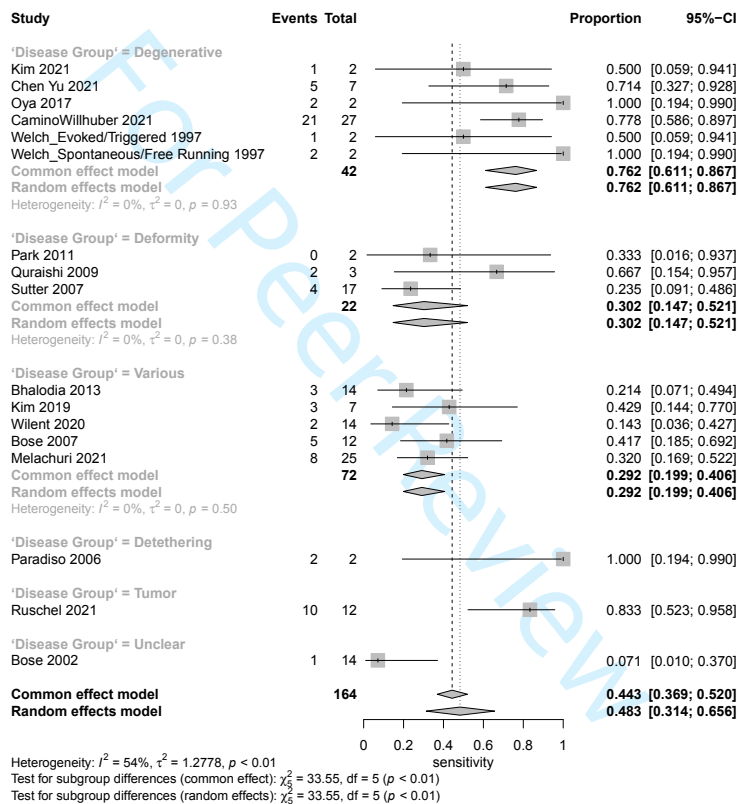

Supplemental Figure 8b. Forest plot for Specificity for EMG by Disease Group

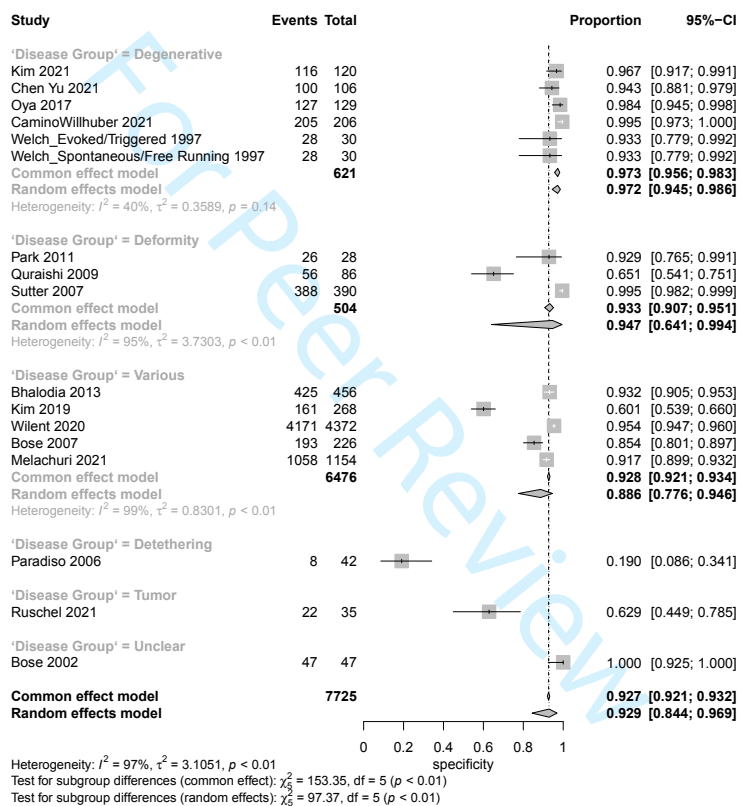



### Comparison of sROC for EMG by Indication

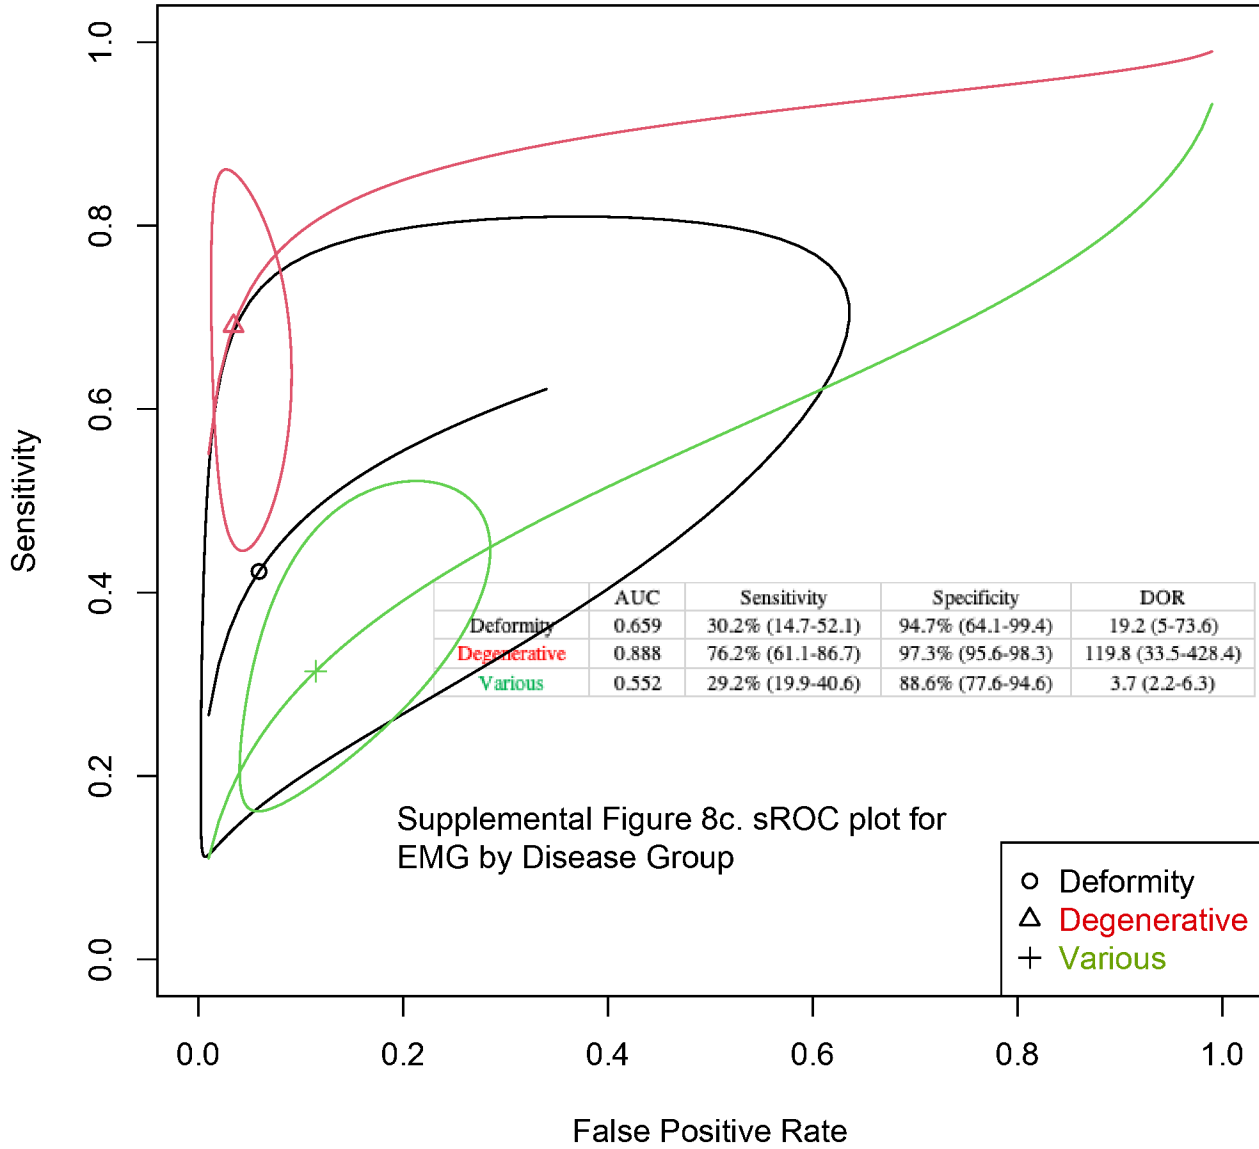

Supplemental Figure 9a. Forest plot for Sensitivity for EMG by Region of Surgery

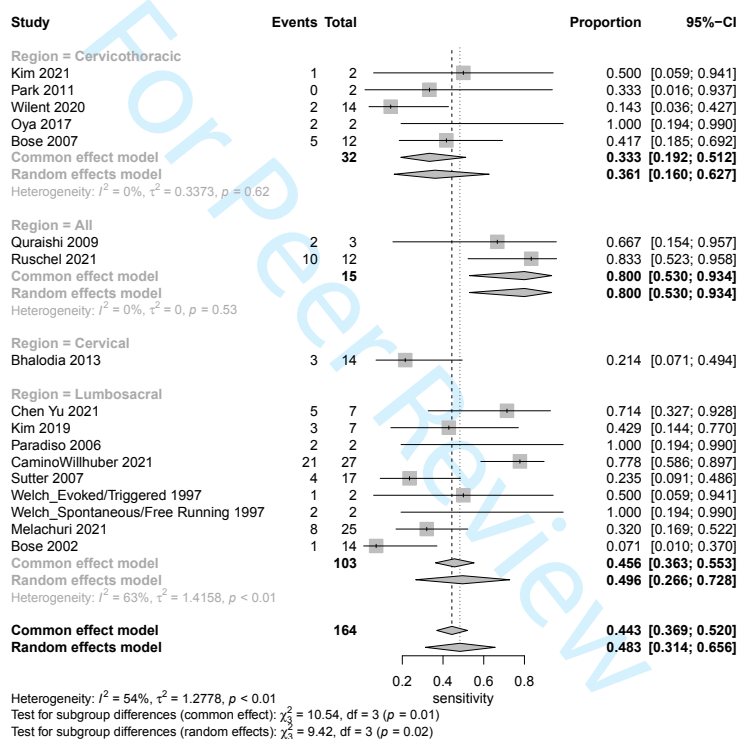

**Supplemental Figure 9b. Forest plot for Specificity for EMG by Region of Surgery**

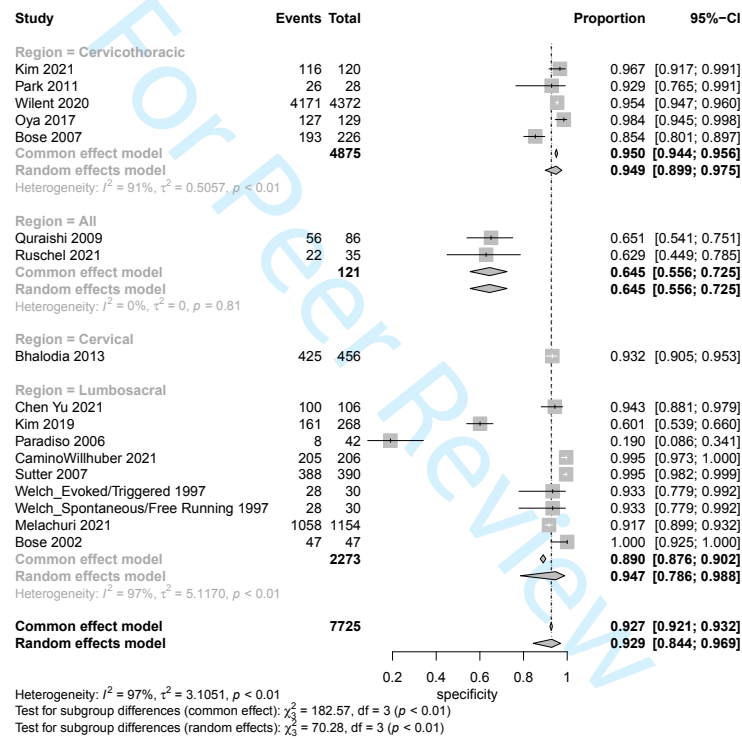

### Comparison of sROC for EMG by Different Region

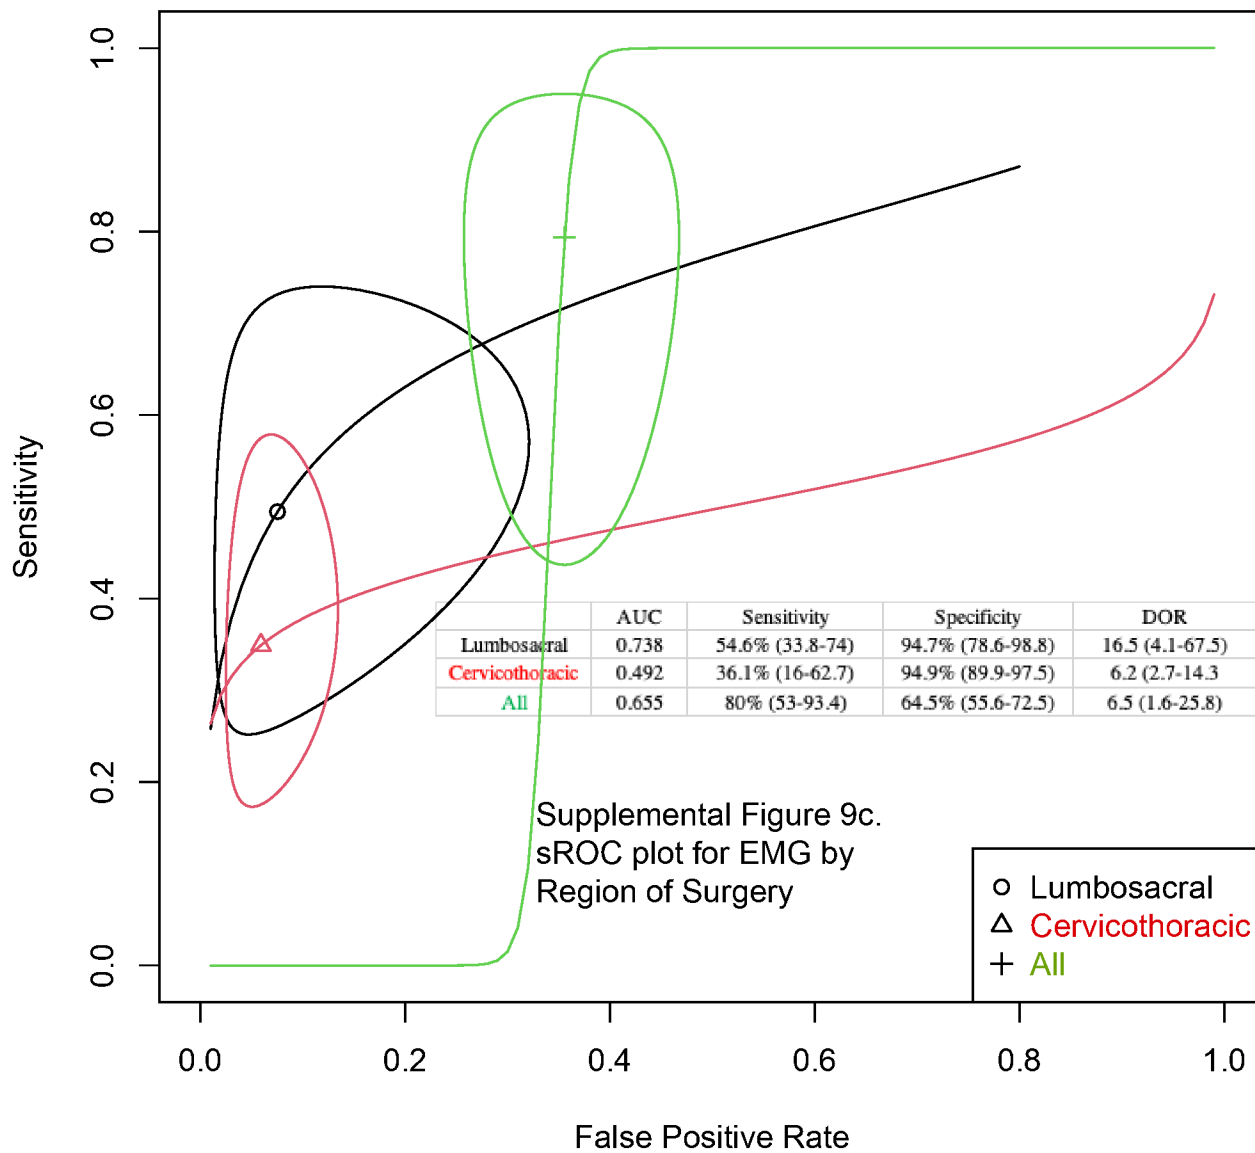

Global Spine Journal

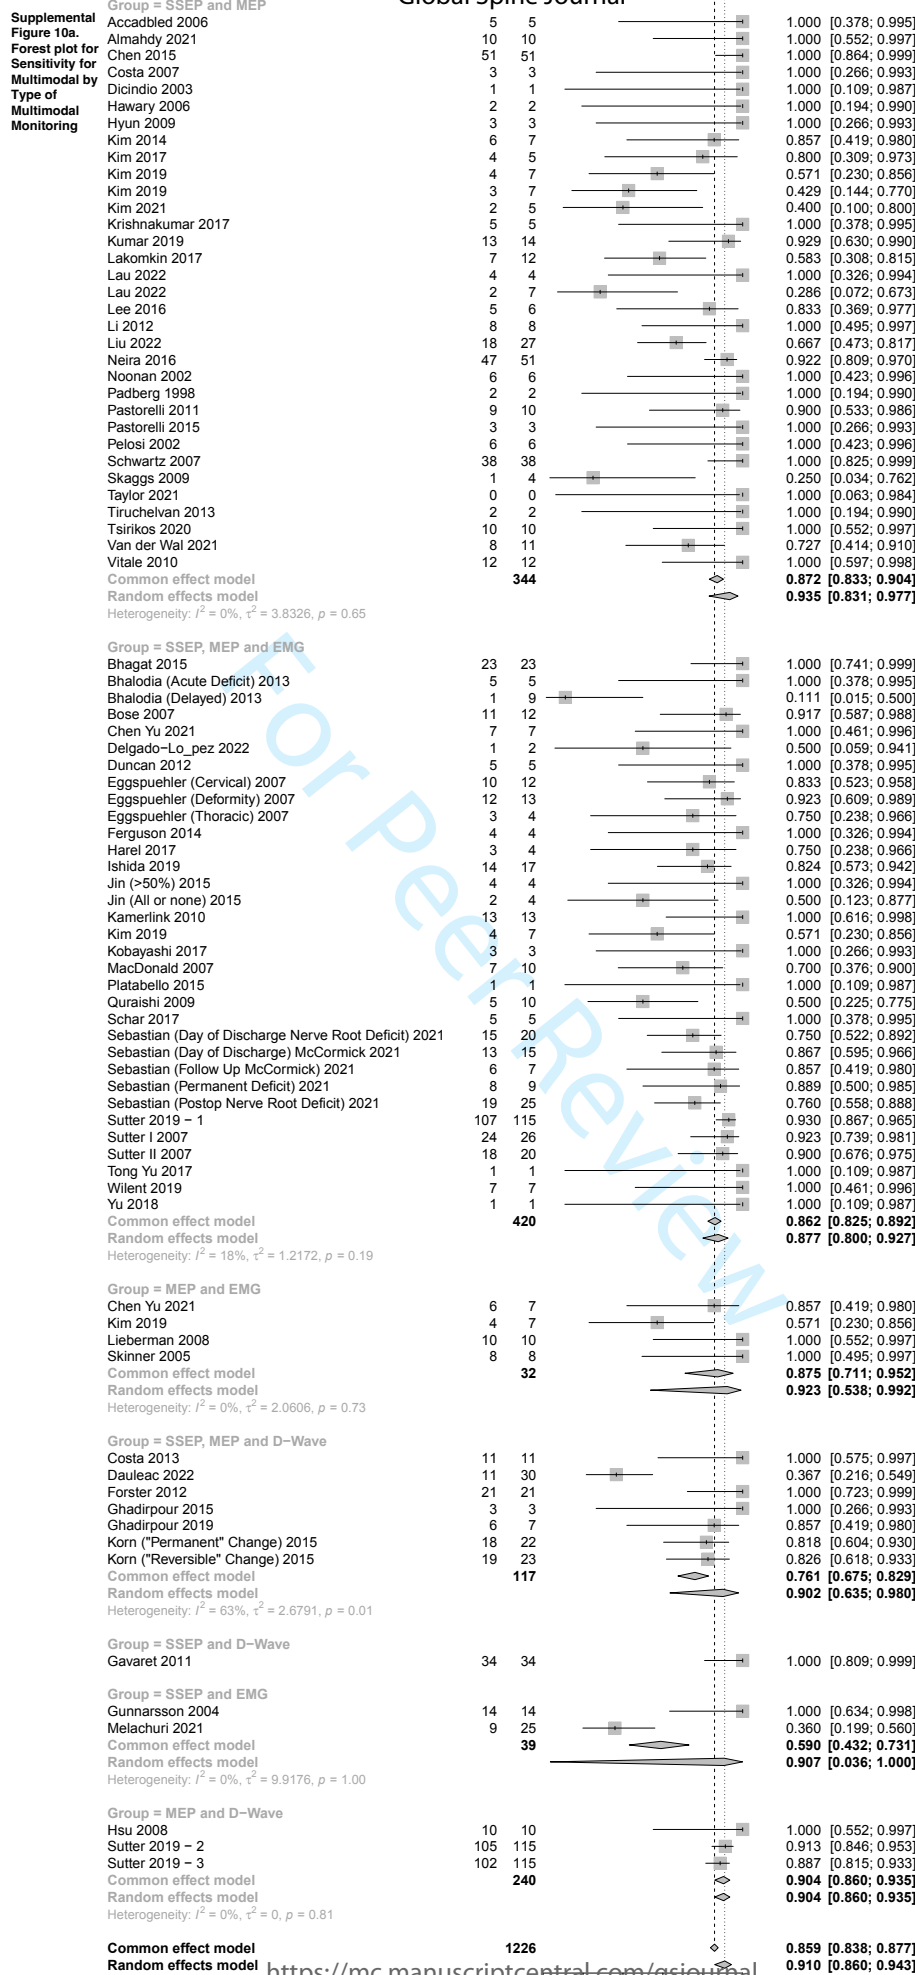

Heterogeneity:  $I^2 = 40\%$ ,  $\tau^2 = 2.4511$ ,  $p < 0.01$   
 Test for subgroup differences (common effect):  $\chi^2 = 32.21$ ,  $df = 6$  ( $p < 0.01$ )  
 Test for subgroup differences (random effects):  $\chi^2 = 1.46$ ,  $df = 6$  ( $p = 0.96$ )

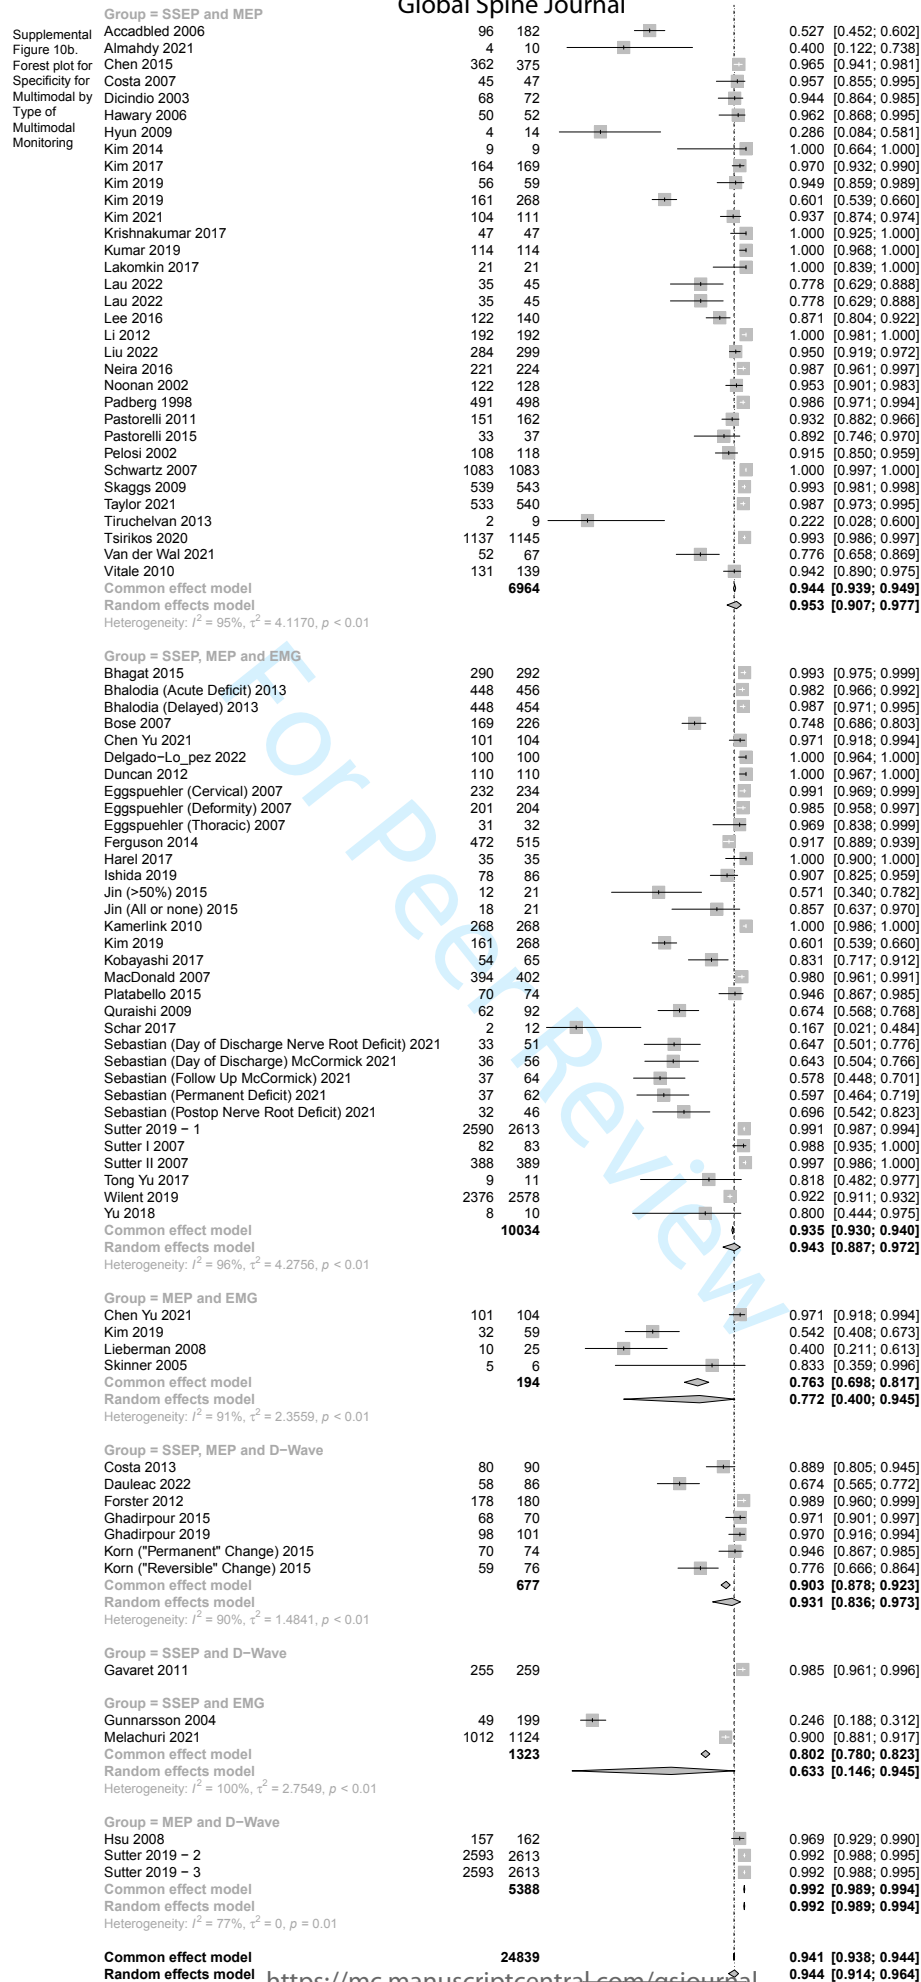

### SROC - Comparison of Different Multimodal Techniques

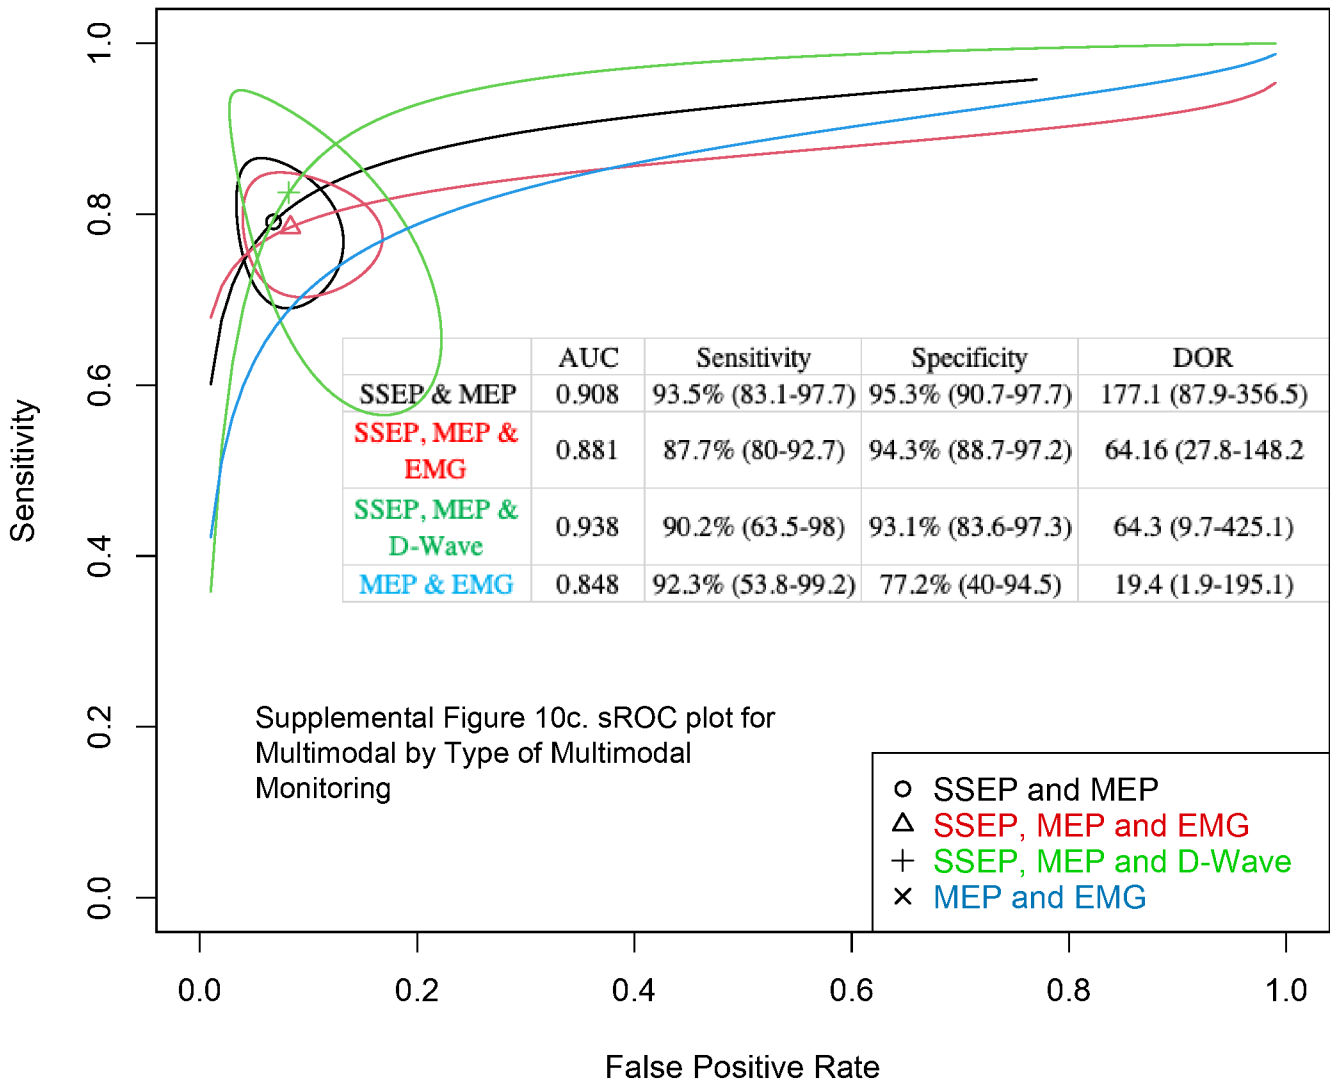

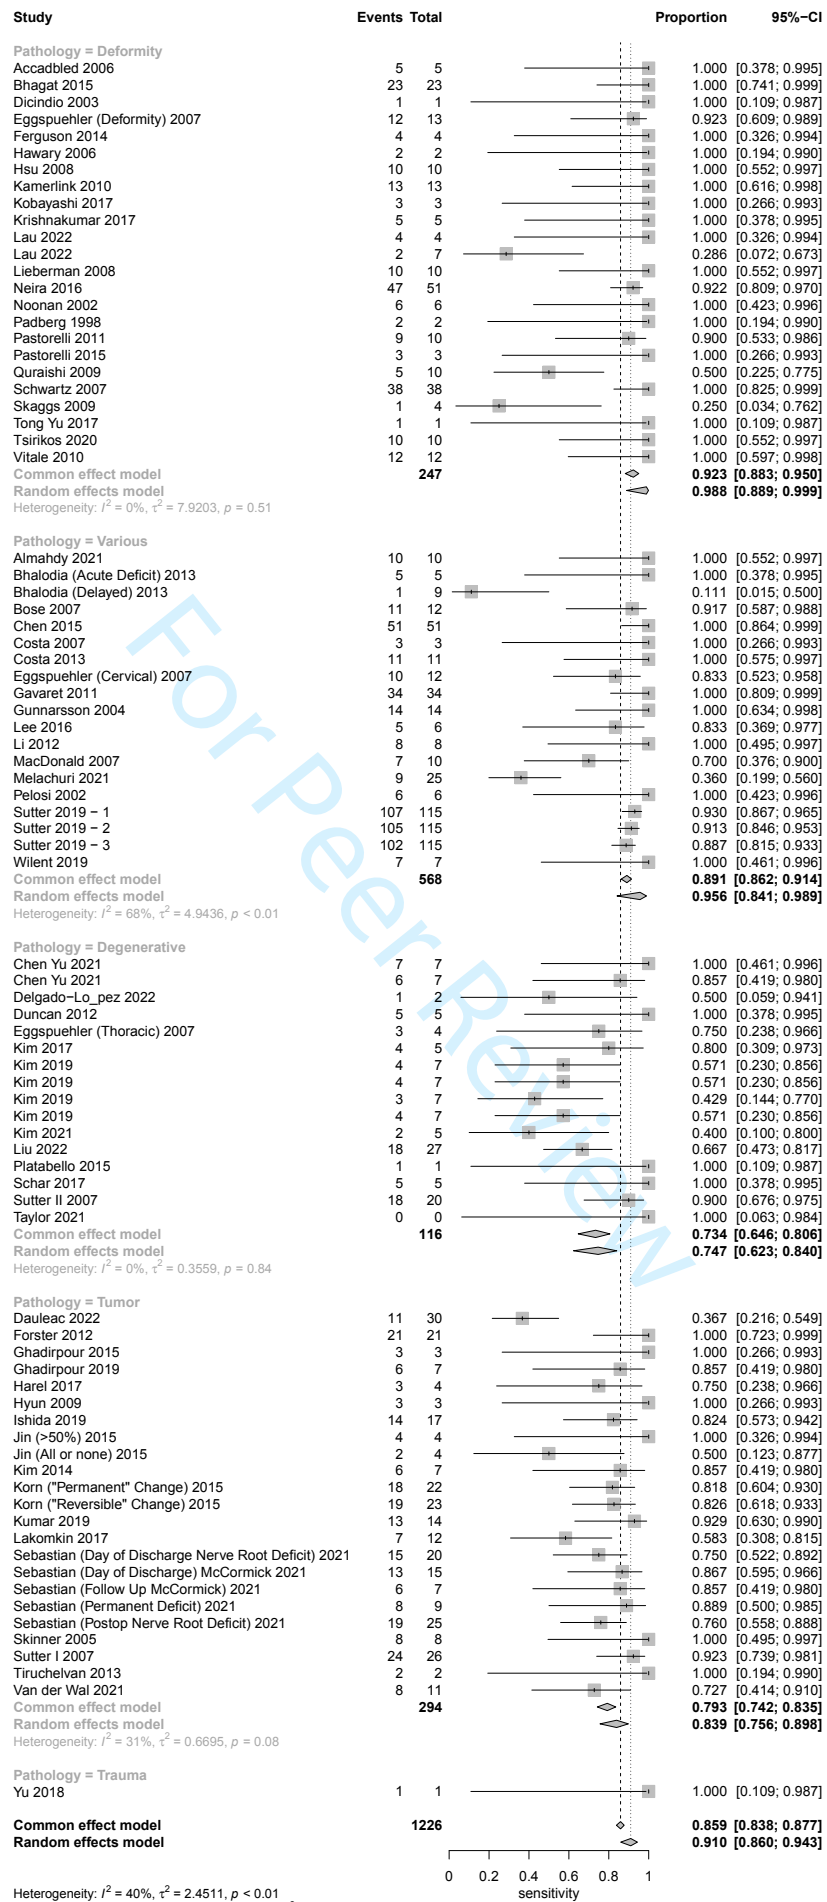

Heterogeneity:  $I^2 = 40\%$ ,  $\tau^2 = 2.4511$ ,  $p < 0.01$   
 Test for subgroup differences (common effect):  $\chi^2 = 36.51$ ,  $df = 4$  ( $p < 0.01$ )  
 Test for subgroup differences (random effects):  $\chi^2 = 12.90$ ,  $df = 4$  ( $p = 0.01$ )



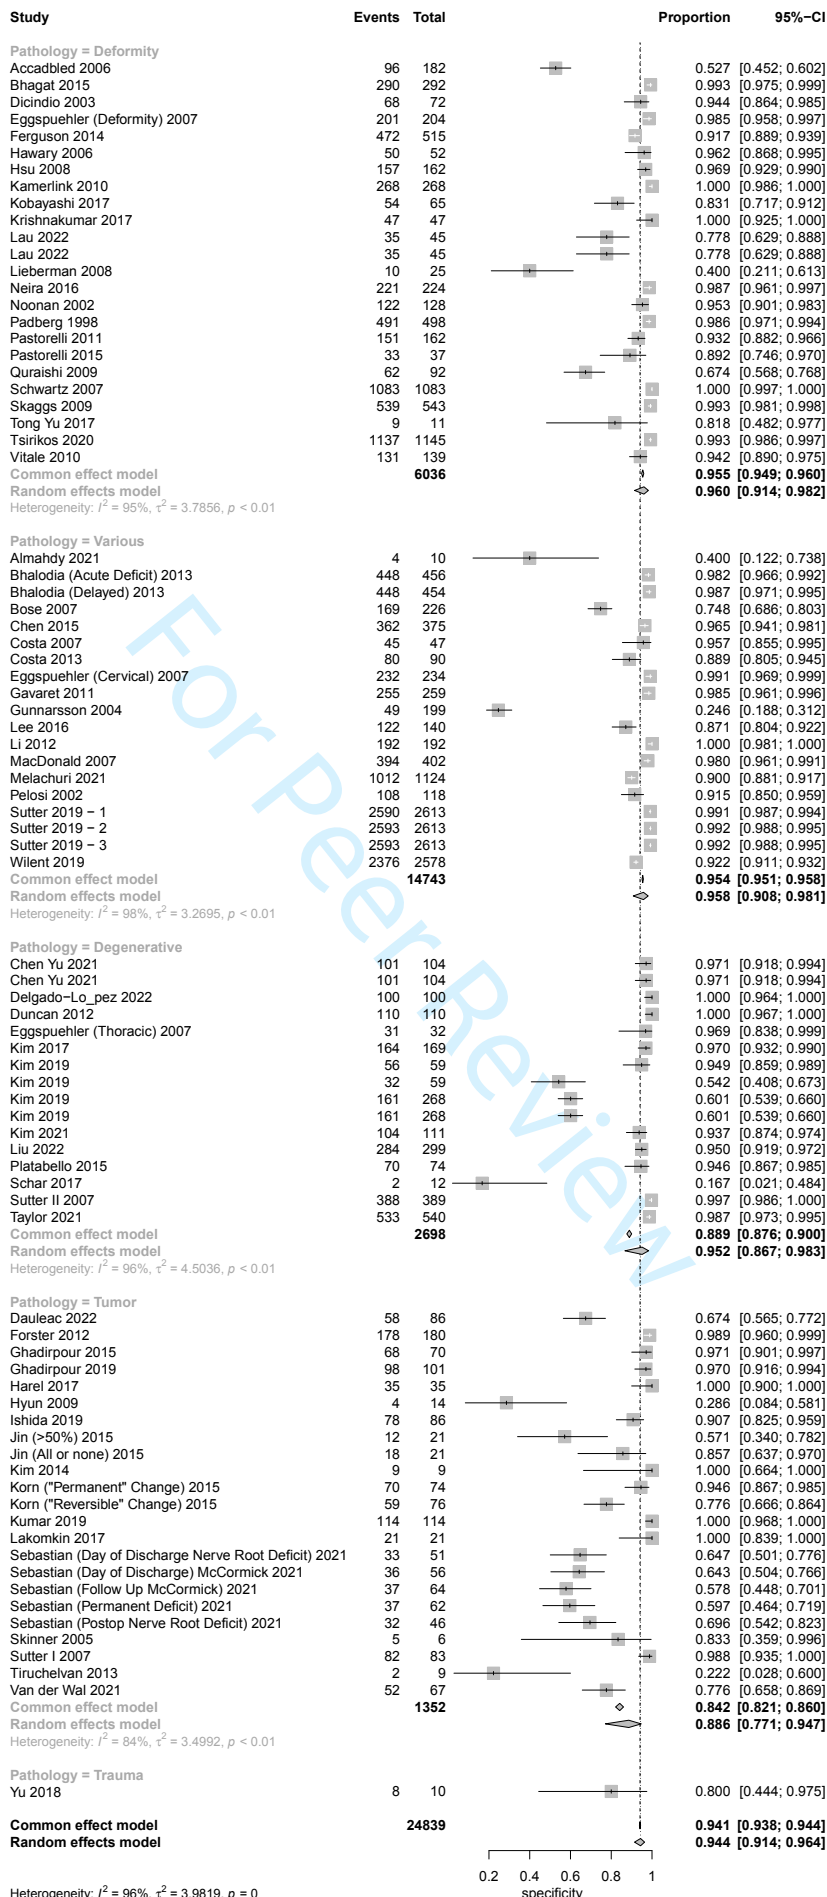

Heterogeneity:  $I^2 = 96\%$ ,  $\tau^2 = 3.9819$ ,  $p = 0$

Test for subgroup differences (common effect):  $\chi^2 = 401.80$ ,  $df = 4$  ( $p < 0.01$ )

Test for subgroup differences (random effects):  $\chi^2 = 7.69$ ,  $df = 4$  ( $p = 0.10$ )

### SROC - Comparison of sROC for Different Pathology Groups

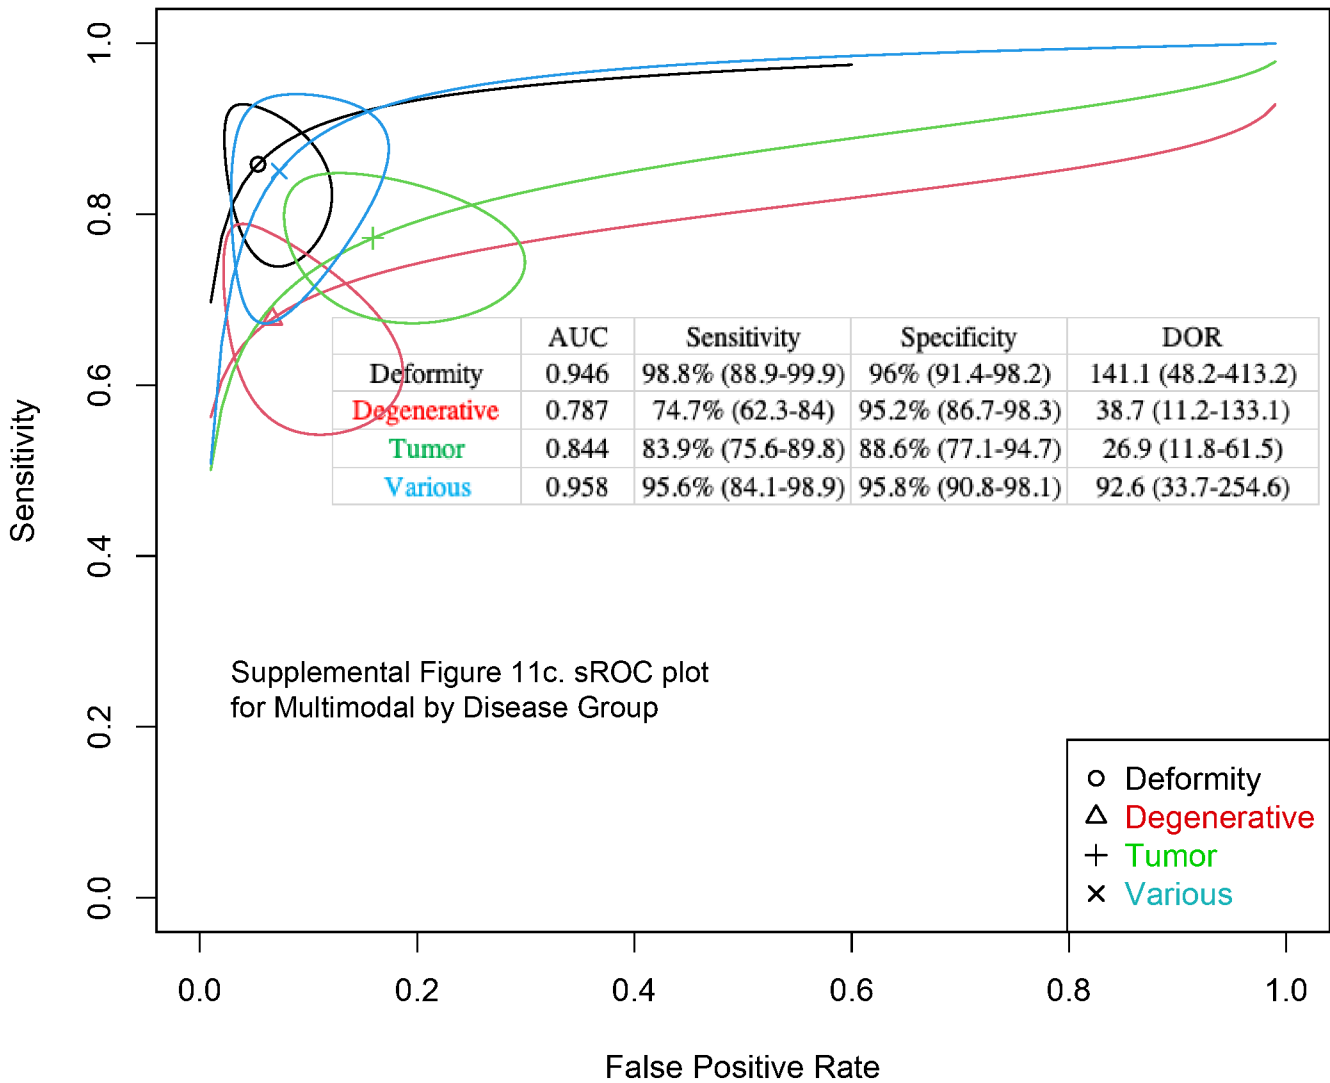

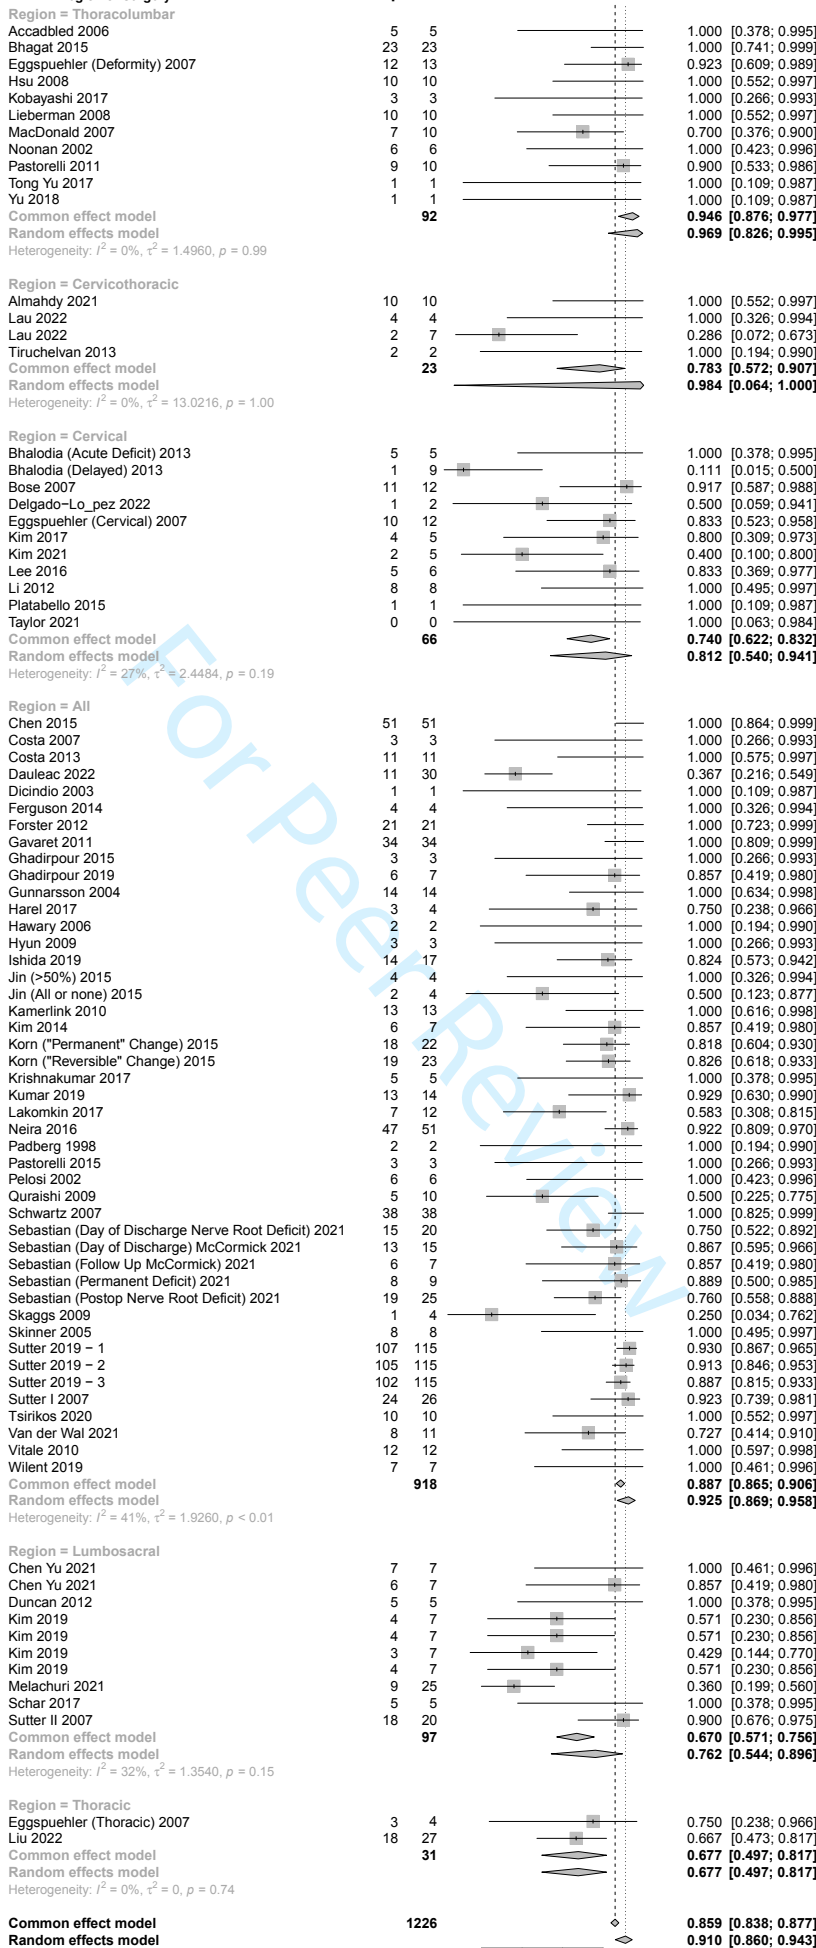

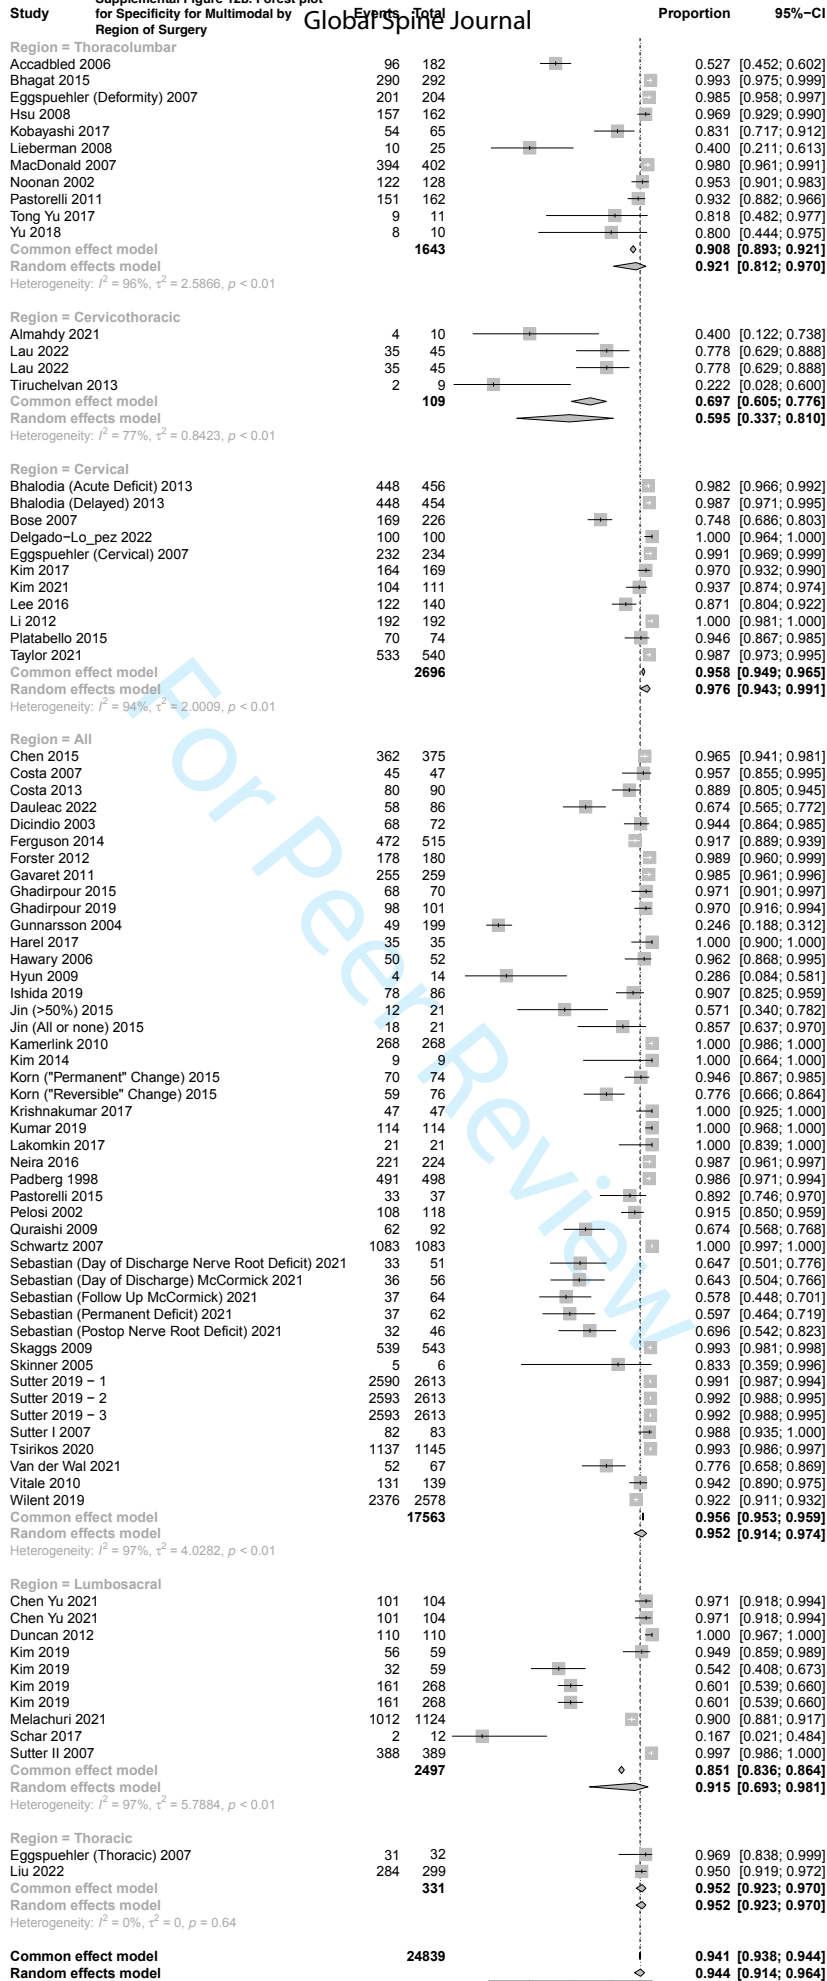

Heterogeneity:  $I^2 = 96\%$ ,  $\tau^2 = 3.9819$ ,  $p = 0$   
 Test for subgroup differences (common effect):  $\chi^2_5 = 517.21$ ,  $df = 5$  ( $p < 0.01$ )  
 Test for subgroup differences (random effects):  $\chi^2_5 = 25.11$ ,  $df = 5$  ( $p < 0.01$ )

### Comparison of sROC for Multimodal for Different Regions

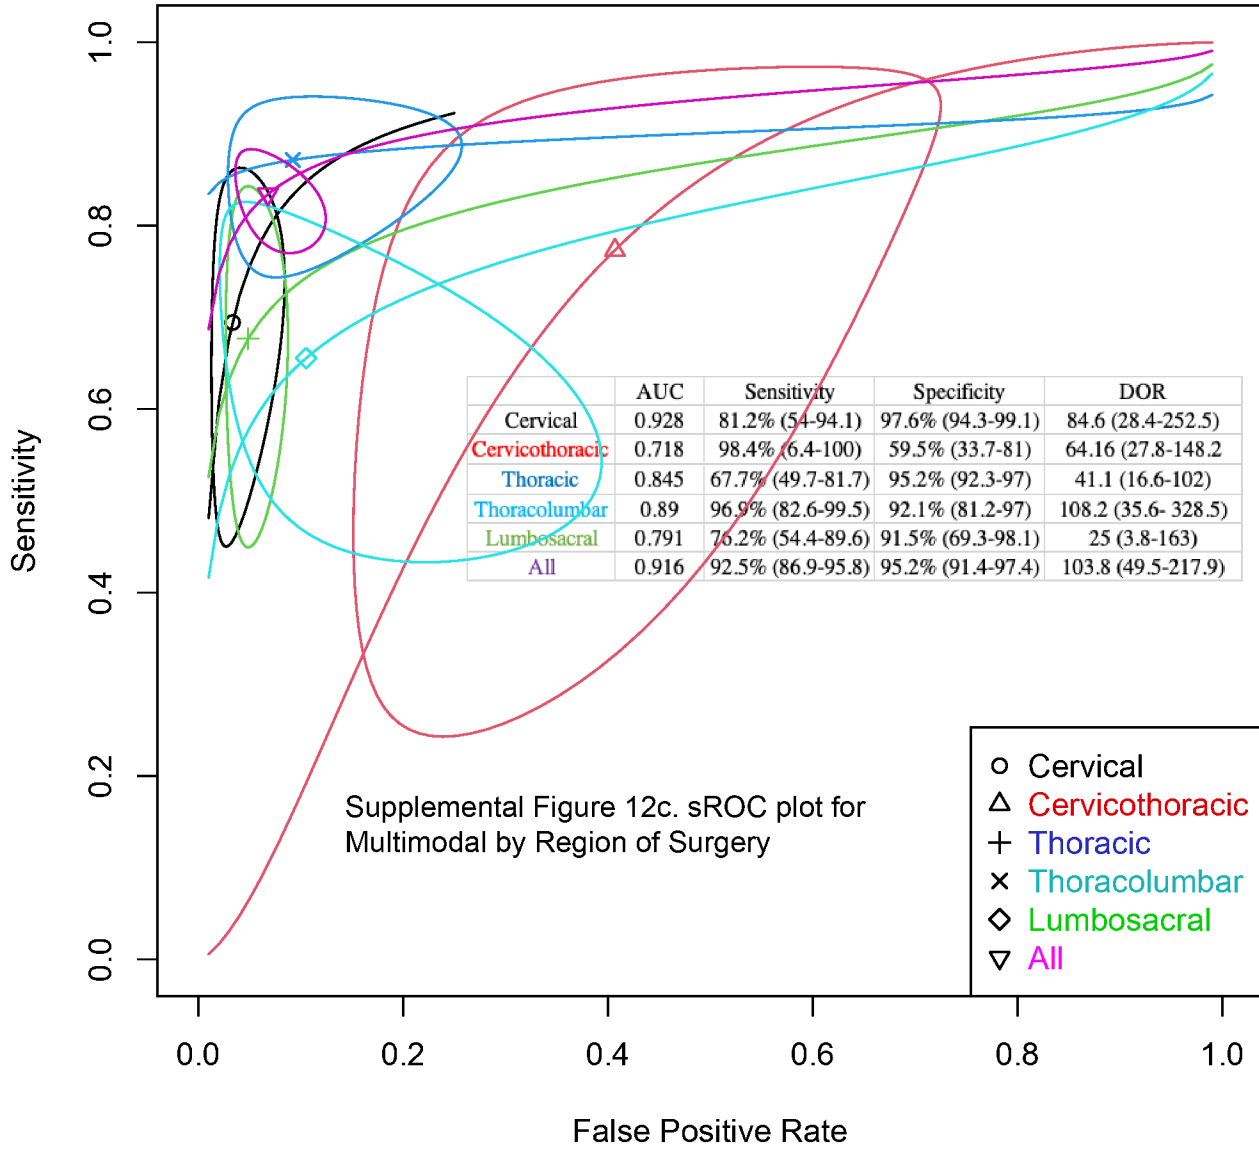

Supplement: sj-pdf-1-gsj-10.1177_21925682231196514.pdf [file sj-pdf-1-gsj-10.1177_21925682231196514.pdf]
